# Supplementary material for: The trimerization of acetylenes involves a cascade of biradical and pericyclic processes
Source: Royal Society of Chemistry journal article supplement (doi:10.1039/c7ob01885a), 2017-01-01
Supplement: c7ob01885a1.pdf [file c7ob01885a1.pdf]

## Supporting Information

for

### Computational Studies on Aryl Ring Formation by the Cross-Linking of Acetylenes

Gavin O. Jones,<sup>a</sup> Zachary J. Krebs<sup>b</sup>

<sup>a</sup>IBM Research-Almaden, 650 Harry Rd, San Jose, CA 95120. <sup>b</sup>Department of Physics, University of Chicago, Chicago, IL, 60637.

#### Table of contents

|                                                                                         |     |
|-----------------------------------------------------------------------------------------|-----|
| A. Spin-correction analysis                                                             | S1  |
| B. Spin-correction of species derived from phenylacetylene and methylacetylene          | S1  |
| C. Barriers for carbene formation from vinylcyclobutene biradicals                      | S3  |
| D. Cartesian coordinates and energies of stationary points derived from phenylacetylene | S4  |
| E. Cartesian coordinates and energies of stationary points derived from methylacetylene | S68 |

#### A. Spin-correction analysis

The energy of spin-corrected singlet species,  ${}^1E(\text{SC})$ , can be calculated from the following relationship<sup>1</sup>

$${}^1E(\text{SC}) = {}^1E + f'_{\text{sc}}(n)[{}^1E - {}^3E],$$

where,

${}^1E$  = energy of spin-uncorrected singlet species

${}^3E$  = energy of triplet species

and,

$$f'_{\text{sc}}(n) = \frac{{}^1\langle S^2 \rangle}{3\langle S^2 \rangle - {}^1\langle S^2 \rangle}$$

#### B. Spin-correction of species derived from phenylacetylene and methylacetylene

**S-squared values of singlet species derived from phenylacetylene that required spin-correction are:**

int1b\_14eze: S-Squared = 1.085

int1b\_14zez: S-Squared = .975

int1b\_14zzz: S-Squared = 1.057  
int2\_12: S-Squared = 1.023  
int2\_13: S-Squared = .985  
ts1b\_14zzz0deg: S-Squared = .151  
ts2b\_14zzz\_eze: S-Squared = 1.085  
ts3b\_14eze: S-Squared = .657

S-squared values of singlet species derived from methylacetylene that required spin-correction are:

int1b\_12: S-Squared = .941  
int1b\_14eee: S-Squared = 1.041  
int1b\_14eez: S-Squared = 1.019  
int1b\_14eze: S-Squared = 1.033  
int1b\_14zez: S-Squared = .915  
int1c: S-Squared = .102  
int2r\_14enyne: S-Squared = .764  
int3bhh\_12: S-Squared = 1.038  
int3bhme\_12: S-Squared = 1.041  
int3bmeh\_12: S-Squared = .988  
int3bmehx\_12: S-Squared = 1.037  
int3bmeme\_12: S-Squared = 1.041  
int5crbhmememe\_12: S-Squared = .246  
ts1b\_14zez: S-Squared = .230  
ts2b\_14eee\_eze: S-Squared = 1.008  
ts2b\_14eez\_eee: S-Squared = 1.037  
ts2b\_14zez\_eez: S-Squared = .929  
ts3b\_14eze: S-Squared = .815  
ts3strss\_14eee: S-Squared = .542  
ts4bcrbhh\_12: S-Squared = .722  
ts4bhh\_12: S-Squared = .910  
ts4bhh\_13: S-Squared = .803  
ts4bhme\_12: S-Squared = .956  
ts4bmeh\_12: S-Squared = .996  
ts4bmeme\_13: S-Squared = .959

C. Barriers for carbene formation from vinylcyclobutene biradicals

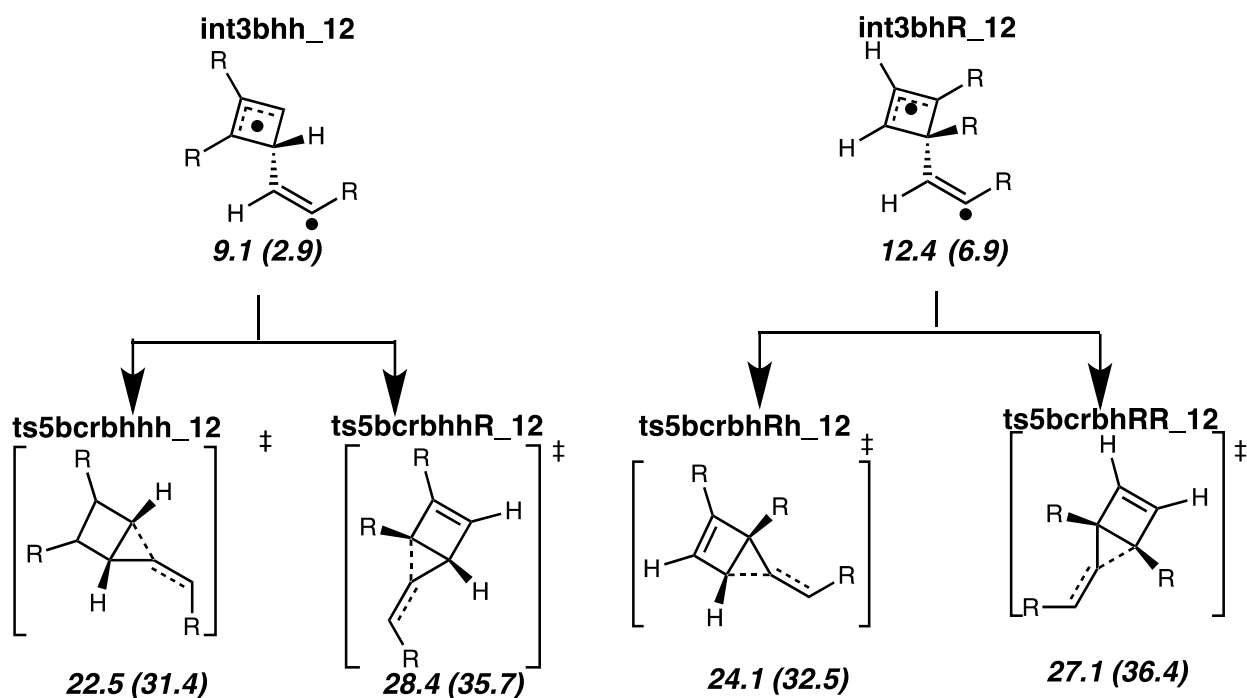

The free Figure S1. Structures and free energies of activation, in kcal/mol, for carbene formation from phenyl- and methyl-substituted (in parentheses) vinyl cyclobutene biradicals energies shown in Figure S1 indicate that the barriers for carbene formation range from 23 -28 kcal/mol and from 31 -36 kcal/mol for reactions involving phenyl and methyl-substituted vinyl cyclobutene biradicals. These are at least 12 kcal/mol larger than barriers for rotation to form Dewar benzenes.

Phenylacetylene Stationary Points

123ph3ph

E [Hartrees] = -925.4508367649

Gcorr [kcal/mol] = 188.752

|   |             |             |             |
|---|-------------|-------------|-------------|
| C | -0.00027416 | -0.00004787 | -3.47230845 |
| C | 0.00136039  | -1.20203085 | -2.77194127 |
| C | 0.01093066  | -1.22211838 | -1.36915065 |
| C | -0.00012439 | -0.00000900 | -0.65355833 |
| C | -0.01124182 | 1.22207776  | -1.36919702 |
| C | -0.00183683 | 1.20195997  | -2.77198126 |
| C | 0.05785948  | -2.55202947 | -0.69459428 |
| C | -0.00011838 | 0.00003100  | 0.84054176  |
| C | -0.05794931 | 2.55198614  | -0.69462445 |
| C | -1.03489453 | -0.61950152 | 1.55610166  |
| C | -1.03718339 | -0.61743400 | 2.95035261  |
| C | -0.00017548 | 0.00021704  | 3.65261884  |
| C | 1.03688127  | 0.61774668  | 2.95031755  |
| C | 1.03465318  | 0.61962852  | 1.55606307  |
| C | -1.04371096 | 2.86322399  | 0.25535871  |
| C | 0.87444836  | 3.54276682  | -1.03903275 |
| C | 0.83103562  | 4.80491883  | -0.44540909 |
| C | -0.15186967 | 5.10001909  | 0.50012259  |
| C | -1.09015158 | 4.12426317  | 0.84600056  |
| C | -0.87417679 | -3.54307698 | -1.03920056 |
| C | -0.83038517 | -4.80528425 | -0.44573993 |
| C | 0.15253173  | -5.10019189 | 0.49985335  |
| C | 1.09037727  | -4.12411615 | 0.84600496  |
| C | 1.04358190  | -2.86302667 | 0.25551947  |
| H | -0.00035613 | -0.00006370 | -4.55897132 |
| H | 0.02497220  | -2.14620621 | -3.30864451 |
| H | -0.02548395 | 2.14613376  | -3.30868789 |
| H | -1.83444315 | -1.11227875 | 1.01065274  |
| H | -1.84838290 | -1.10103267 | 3.48822364  |
| H | -0.00020154 | 0.00032206  | 4.73939526  |
| H | 1.84806248  | 1.10143123  | 3.48814192  |
| H | 1.83422317  | 1.11234591  | 1.01059245  |
| H | -1.77210713 | 2.10810588  | 0.53269356  |
| H | 1.64802341  | 3.31166952  | -1.76687754 |
| H | 1.56822623  | 5.55512668  | -0.71971994 |
| H | -0.18720611 | 6.08181454  | 0.96472200  |
| H | -1.86233092 | 4.34589106  | 1.57801758  |
| H | -1.64775241 | -3.31218538 | -1.76711506 |
| H | -1.56725702 | -5.55573120 | -0.72023717 |
| H | 0.18821216  | -6.08205402 | 0.96426316  |
| H | 1.86256496  | -4.34557096 | 1.57807365  |

H 1.77166926 -2.10768974 0.53307016

124ph3ph

E [Hartrees] = -925.4543796407

Gcorr [kcal/mol] = 189.640

|   |             |             |             |
|---|-------------|-------------|-------------|
| H | 1.57369804  | 1.54193244  | 5.60271541  |
| C | 1.68539112  | 1.42481890  | 4.52809169  |
| C | 0.58102585  | 1.57667392  | 3.68564877  |
| H | -0.39324275 | 1.81793455  | 4.10251770  |
| C | 0.72129813  | 1.42260034  | 2.30818412  |
| H | -0.14062269 | 1.53934373  | 1.65881135  |
| C | 1.97004404  | 1.11483862  | 1.74363184  |
| C | 3.07293081  | 0.97008883  | 2.60002515  |
| H | 4.04258489  | 0.71986696  | 2.17745971  |
| C | 2.93242715  | 1.12104009  | 3.98010729  |
| H | 3.79732395  | 0.99644598  | 4.62653093  |
| C | 2.14291508  | 0.98435976  | 0.27070156  |
| C | 3.16624613  | 1.71819139  | -0.35010430 |
| H | 3.80678096  | 2.34211814  | 0.26725756  |
| C | 3.36158358  | 1.68962773  | -1.72619981 |
| H | 4.17682251  | 2.25712334  | -2.16599124 |
| C | 2.52621880  | 0.91762893  | -2.54732209 |
| H | 0.85557455  | -0.43597022 | -2.54205897 |
| C | 1.51059132  | 0.17634693  | -1.92896769 |
| C | 2.71384448  | 0.87858180  | -4.01846464 |
| C | 2.54668710  | -0.31676744 | -4.73811077 |
| H | 2.30317163  | -1.23116987 | -4.20418981 |
| C | 2.72122757  | -0.35012402 | -6.12083276 |
| H | 2.59427929  | -1.28747132 | -6.65618176 |
| C | 3.06862020  | 0.81098188  | -6.81449206 |
| H | 3.20503209  | 0.78492983  | -7.89221920 |
| C | 3.23968481  | 2.00576565  | -6.11229056 |
| H | 3.50209853  | 2.91726357  | -6.64310550 |
| C | 3.06361854  | 2.03890587  | -4.72975338 |
| H | 3.17224613  | 2.97884171  | -4.19554675 |
| C | 1.30436292  | 0.18428010  | -0.54284840 |
| C | 0.22262292  | -0.68003761 | 0.00810834  |
| C | 0.47521923  | -1.58613307 | 1.05067358  |
| H | 1.47026809  | -1.63527172 | 1.48179779  |
| C | -0.53523794 | -2.41454217 | 1.53415351  |
| H | -0.31911833 | -3.11134386 | 2.33972872  |
| C | -1.81929297 | -2.35290623 | 0.98667199  |
| H | -2.60745627 | -2.99720411 | 1.36702157  |
| C | -2.08305182 | -1.45803412 | -0.05127061 |

|   |             |             |             |
|---|-------------|-------------|-------------|
| H | -3.07943590 | -1.39896596 | -0.48153714 |
| C | -1.06957628 | -0.63090819 | -0.53732653 |
| H | -1.28080546 | 0.07421892  | -1.33702459 |

135ph3ph

E [Hartrees] = -925.4571702645

Gcorr [kcal/mol] = 190.466

|   |             |             |             |
|---|-------------|-------------|-------------|
| H | 5.89160093  | -0.00167855 | 3.39915777  |
| C | 4.95022175  | -0.00126903 | 2.85637818  |
| C | 3.87835893  | 0.77165756  | 3.30755402  |
| H | 3.98469783  | 1.38294226  | 4.19998188  |
| C | 2.67080614  | 0.77258249  | 2.61062420  |
| H | 1.85074336  | 1.39727820  | 2.95393856  |
| C | 2.50863856  | 0.00012150  | 1.44848873  |
| C | 3.59512132  | -0.77303586 | 1.00632164  |
| H | 3.48104873  | -1.39716765 | 0.12425622  |
| C | 4.80320095  | -0.77346586 | 1.70227342  |
| H | 5.62826100  | -1.38538819 | 1.34701148  |
| C | 1.22218402  | 0.00048262  | 0.70621228  |
| C | -0.00006946 | 0.00001786  | 1.39233092  |
| H | -0.00004973 | 0.00006024  | 2.47816402  |
| C | -1.22228443 | -0.00054963 | 0.70612153  |
| H | 2.14567192  | 0.00149855  | -1.23821830 |
| C | -1.20525698 | -0.00085943 | -0.69543189 |
| H | -2.14556935 | -0.00154420 | -1.23840841 |
| C | 0.00005069  | -0.00002432 | -1.41078602 |
| C | 0.00008118  | 0.00003305  | -2.89602771 |
| C | 0.92360729  | 0.77557531  | -3.61648552 |
| H | 1.62917003  | 1.40145723  | -3.07702083 |
| C | 0.92413867  | 0.77555937  | -5.01071764 |
| H | 1.64228393  | 1.38926144  | -5.54828107 |
| C | 0.00002796  | 0.00038877  | -5.71425802 |
| H | 0.00003948  | 0.00046062  | -6.80090034 |
| C | -0.92400690 | -0.77502121 | -5.01085765 |
| H | -1.64216143 | -1.38859690 | -5.54849858 |
| C | -0.92349911 | -0.77530671 | -3.61661986 |
| H | -1.62912508 | -1.40130190 | -3.07729546 |
| C | 1.20530232  | 0.00080478  | -0.69533893 |
| C | -2.50878902 | -0.00035956 | 1.44830958  |
| C | -2.67046459 | -0.77192354 | 2.61109726  |
| H | -1.85010164 | -1.39597907 | 2.95482628  |
| C | -3.87790030 | -0.77094261 | 3.30822437  |
| H | -3.98379606 | -1.38149695 | 4.20114839  |
| C | -4.95016602 | 0.00109470  | 2.85655197  |

|   |             |            |            |
|---|-------------|------------|------------|
| H | -5.89143198 | 0.00160719 | 3.39952568 |
| C | -4.80371009 | 0.77230157 | 1.70173775 |
| H | -5.62907704 | 1.38352245 | 1.34609452 |
| C | -3.59570567 | 0.77187283 | 1.00566493 |
| H | -3.48209210 | 1.39533058 | 0.12307309 |

int1b\_14eze

E [Hartrees] = -616.7811063604

|   |             |             |             |
|---|-------------|-------------|-------------|
| C | -3.04670534 | 0.10081168  | -0.06198428 |
| C | -1.78102200 | -0.24415001 | -0.03067932 |
| C | -2.96561500 | 2.59244998  | -0.37048681 |
| C | -3.61466288 | 1.46354762  | -0.20870892 |
| C | -0.58532566 | -0.92620138 | 0.04211372  |
| C | -2.60401799 | 3.91059169  | -0.54851258 |
| H | -3.80275950 | -0.68888943 | 0.03000501  |
| H | -4.71080416 | 1.49495204  | -0.17428224 |
| C | 0.06171144  | -1.15283688 | 1.29940329  |
| C | 0.06225319  | -1.41347023 | -1.13849645 |
| C | -2.34884843 | 4.76595993  | 0.57126714  |
| C | -2.45018288 | 4.46505443  | -1.85990845 |
| H | -2.45418058 | 4.35953989  | 1.57241831  |
| C | -1.98448071 | 6.08843990  | 0.37893186  |
| H | -0.41133804 | -1.24399859 | -2.10056083 |
| C | 1.26432497  | -2.09624878 | -1.05182568 |
| H | -0.41257027 | -0.78409571 | 2.20365987  |
| C | 1.26368243  | -1.83860041 | 1.35967982  |
| H | -2.63347434 | 3.82831371  | -2.71988069 |
| C | -2.08487165 | 5.79080964  | -2.02587886 |
| C | -1.85034375 | 6.61488262  | -0.91474797 |
| H | -1.98239642 | 6.19528731  | -3.02965214 |
| H | -1.80373078 | 6.72392567  | 1.24213868  |
| C | 1.87575648  | -2.31760394 | 0.19151163  |
| H | 1.73424785  | -2.00849928 | 2.32475157  |
| H | 2.81745624  | -2.85567889 | 0.24928262  |
| H | 1.73559031  | -2.46597834 | -1.95894056 |
| H | -1.56622733 | 7.65371879  | -1.05528195 |

int1b\_14zez

E [Hartrees] = -616.7879105579

Gcorr [kcal/mol] = 114.872

|   |             |            |             |
|---|-------------|------------|-------------|
| C | -0.80588211 | 1.38463142 | -0.13515625 |
| C | 0.49382522  | 1.22380096 | -0.08433156 |
| C | -2.76383908 | 2.89313898 | -0.25896165 |
| C | -1.46415258 | 2.73241137 | -0.20697466 |

|   |             |            |             |
|---|-------------|------------|-------------|
| C | 1.82967431  | 1.61035340 | -0.05162792 |
| C | -4.09936175 | 2.50557827 | -0.29409617 |
| H | -1.48620573 | 0.53275441 | -0.12782683 |
| H | -0.78384414 | 3.58431507 | -0.21333541 |
| C | 2.58659040  | 1.74182060 | -1.25448491 |
| C | 2.50000013  | 1.83416155 | 1.18838606  |
| C | -4.85827479 | 2.37227486 | 0.90728167  |
| C | -4.76727087 | 2.28235586 | -1.53550767 |
| H | -4.36442238 | 2.54568034 | 1.85852560  |
| C | -6.19892015 | 2.02100642 | 0.85935702  |
| H | 1.93783893  | 1.73125339 | 2.11154299  |
| C | 3.84188505  | 2.18327753 | 1.21179418  |
| H | 2.09084646  | 1.56801714 | -2.20467414 |
| C | 3.92768994  | 2.09169366 | -1.20929202 |
| H | -4.20355841 | 2.38678422 | -2.45754661 |
| C | -6.10874429 | 1.93191986 | -1.56165835 |
| C | -6.83514423 | 1.79872735 | -0.36998776 |
| H | -6.59857528 | 1.75819528 | -2.51628903 |
| H | -6.75886154 | 1.91649530 | 1.78510130  |
| C | 4.56633158  | 2.31448565 | 0.01871459  |
| H | 4.48608718  | 2.19469797 | -2.13613379 |
| H | 5.61768093  | 2.58613888 | 0.04564174  |
| H | 4.33359217  | 2.35750955 | 2.16537180  |
| H | -7.88613923 | 1.52594943 | -0.39901830 |

int1b\_14zzz

E [Hartrees] = -616.7855532420

Gcorr [kcal/mol] = 115.657

|   |             |            |             |
|---|-------------|------------|-------------|
| C | -0.80171562 | 1.39404058 | -0.04425520 |
| C | 0.46723178  | 1.05551563 | -0.02211395 |
| C | -0.62464977 | 3.89541040 | -0.15515496 |
| C | -1.34084929 | 2.79452501 | -0.12284325 |
| C | 1.83261514  | 1.33912062 | -0.03169526 |
| C | 0.58915334  | 4.58378204 | -0.15727796 |
| H | -1.57167003 | 0.62094508 | -0.00504873 |
| H | -2.43061758 | 2.85267328 | -0.15215506 |
| C | 2.56113827  | 1.39825320 | -1.25499542 |
| C | 2.54558640  | 1.54948524 | 1.18414161  |
| C | 1.25373703  | 4.89276121 | -1.37903109 |
| C | 1.18606683  | 5.02087377 | 1.06024754  |
| H | 0.80650012  | 4.56767140 | -2.31333437 |
| C | 2.46331468  | 5.57081422 | -1.37115086 |
| H | 2.00177161  | 1.50446690 | 2.12264794  |
| C | 3.90251785  | 1.83397165 | 1.16519652  |



|   |            |            |             |
|---|------------|------------|-------------|
| H | 2.02959042 | 1.23587292 | -2.18762473 |
| C | 3.91809305 | 1.68377758 | -1.25378741 |
| H | 0.68657025 | 4.79483081 | 1.99733084  |
| C | 2.39616132 | 5.69801339 | 1.04827339  |
| C | 3.04447465 | 5.97704521 | -0.16240767 |
| H | 2.84614916 | 6.00887107 | 1.98754453  |
| H | 2.96554207 | 5.78237954 | -2.31154577 |
| C | 4.59893896 | 1.90463195 | -0.04890580 |
| H | 4.45468564 | 1.74142041 | -2.19725274 |
| H | 5.66154842 | 2.12996022 | -0.05594370 |
| H | 4.42683511 | 2.00889486 | 2.10107837  |
| H | 3.99330232 | 6.50586719 | -0.16396020 |

int1c

E [Hartrees] = -616.7490278780

|   |             |             |             |
|---|-------------|-------------|-------------|
| C | -0.96004360 | 0.68478848  | 0.22778063  |
| C | -1.15127220 | -0.16047594 | 1.37752150  |
| C | 0.35851189  | 0.86512772  | -0.29103909 |
| C | 1.11522728  | -0.47350118 | -0.62544206 |
| C | 0.88921633  | -1.57710434 | -1.52159707 |
| C | 1.69596278  | 0.24575541  | 0.26389753  |
| H | 0.48815030  | 1.64578183  | -1.04485102 |
| H | 2.51097808  | 0.44992824  | 0.93859738  |
| C | -0.39529749 | -0.02943537 | 2.56983552  |
| C | -2.19736464 | -1.11486236 | 1.36064096  |
| C | -0.32843297 | -1.67052451 | -2.21634130 |
| C | 1.87119837  | -2.56915106 | -1.69838862 |
| H | -1.07944641 | -0.90069959 | -2.05984161 |
| C | -0.56001296 | -2.74374067 | -3.07363689 |
| H | 2.81138554  | -2.49271026 | -1.15993926 |
| C | 1.63128077  | -3.63770416 | -2.55678172 |
| H | 0.39027228  | 0.71899158  | 2.61770068  |
| C | -0.68596347 | -0.80582589 | 3.68775764  |
| H | -2.80784968 | -1.19388159 | 0.46568619  |
| C | -2.42472567 | -1.94662014 | 2.45089399  |
| C | 0.41727959  | -3.72696292 | -3.24625275 |
| H | -1.50388298 | -2.81365875 | -3.60683302 |
| H | 2.39074594  | -4.40309686 | -2.69046222 |
| H | -3.20897814 | -2.69787755 | 2.40325465  |
| C | -1.68207708 | -1.78511246 | 3.62647613  |
| H | -0.11776966 | -0.66673284 | 4.60440966  |
| H | 0.23478554  | -4.56293628 | -3.91589823 |
| H | -1.89017841 | -2.40659267 | 4.49329258  |

int2\_12

E [Hartrees] = -616.8350641243

Gcorr [kcal/mol] = 117.194

|   |             |             |             |
|---|-------------|-------------|-------------|
| H | -2.39671564 | -3.68419832 | -0.17762534 |
| C | -1.76572424 | -2.80847385 | -0.08894521 |
| C | -0.64418733 | -2.33085463 | -0.77180523 |
| H | -0.07853134 | -2.66178467 | -1.63398330 |
| C | -0.57332451 | -1.14970235 | 0.11179449  |
| C | -1.71168137 | -1.67258825 | 0.85323964  |
| C | -2.43654663 | -1.38214326 | 2.05456722  |
| C | -3.68278671 | -2.01444799 | 2.28866092  |
| H | -4.08141466 | -2.68975723 | 1.53640273  |
| C | -4.40489209 | -1.76632947 | 3.44958719  |
| H | -5.36339616 | -2.25591576 | 3.60159455  |
| C | -3.90530384 | -0.89012968 | 4.41979072  |
| H | -4.47111461 | -0.69732949 | 5.32692786  |
| C | -2.66616048 | -0.27276316 | 4.21595086  |
| H | -2.26031185 | 0.39273724  | 4.97355420  |
| C | -1.93864861 | -0.51304907 | 3.05594065  |
| H | -0.96227291 | -0.05896239 | 2.92741570  |
| C | 0.23082891  | 0.03556428  | 0.07175655  |
| C | 1.44146821  | 0.03302507  | -0.66428600 |
| H | 1.75374191  | -0.88031492 | -1.16333923 |
| C | 2.23777399  | 1.16945826  | -0.73705037 |
| H | 3.16716404  | 1.13953131  | -1.29992173 |
| C | 1.84980163  | 2.34777036  | -0.08921256 |
| H | 2.47341445  | 3.23545367  | -0.14694660 |
| C | 0.64682754  | 2.37557078  | 0.62510901  |
| H | 0.32694814  | 3.29231829  | 1.11380424  |
| C | -0.15422547 | 1.24221847  | 0.70540923  |
| H | -1.10263037 | 1.28799677  | 1.22920980  |

int2\_13

E [Hartrees] = -616.8373482808

Gcorr [kcal/mol] = 115.549

|   |             |             |             |
|---|-------------|-------------|-------------|
| H | -2.17456608 | -0.00484987 | -0.02778730 |
| C | -1.09181090 | -0.00161033 | -0.01343171 |
| C | -0.05711067 | 0.00060374  | -1.02781731 |
| C | 0.95007458  | 0.00246734  | 0.01344108  |
| H | 2.03280915  | 0.00660622  | 0.02777107  |
| C | -0.08461943 | -0.00011720 | 1.02782008  |
| C | -0.10342614 | -0.00066776 | 2.45936742  |
| C | -1.32637078 | -0.00014828 | 3.17009380  |
| H | -2.26127097 | 0.00010080  | 2.61602237  |

|   |             |             |             |
|---|-------------|-------------|-------------|
| C | -1.34062534 | 0.00050752  | 4.55973965  |
| H | -2.29030178 | 0.00134168  | 5.08844434  |
| C | -0.13998760 | 0.00043392  | 5.27953153  |
| H | -0.15415155 | 0.00137193  | 6.36583371  |
| C | 1.07890848  | -0.00082143 | 4.59111466  |
| H | 2.01452673  | -0.00132813 | 5.14433122  |
| C | 1.10067407  | -0.00140146 | 3.20156553  |
| H | 2.04966037  | -0.00247876 | 2.67197859  |
| C | -0.03840395 | 0.00043704  | -2.45936545 |
| C | 1.18453629  | -0.00038126 | -3.17010496 |
| H | 2.11948219  | -0.00109353 | -2.61611421 |
| C | 1.19878859  | -0.00069387 | -4.55976011 |
| H | 2.14843456  | -0.00147737 | -5.08851318 |
| C | -0.00186304 | -0.00018063 | -5.27954884 |
| H | 0.01231564  | -0.00041574 | -6.36585181 |
| C | -1.22073403 | 0.00056361  | -4.59109418 |
| H | -2.15636125 | 0.00097726  | -5.14430140 |
| C | -1.24250659 | 0.00081860  | -3.20155436 |
| H | -2.19144866 | 0.00143597  | -2.67189382 |

int3bhh\_12

E [Hartrees] = -925.2409448482

Gcorr [kcal/mol] = 184.029

|   |             |             |             |
|---|-------------|-------------|-------------|
| C | 0.79250809  | 0.33227713  | 0.50105136  |
| C | -0.67483370 | 0.60318840  | 0.18775160  |
| C | -1.56136339 | -0.56733908 | 0.74233730  |
| C | -1.93269129 | -0.90308466 | -0.58829674 |
| C | -1.16535396 | 0.12219455  | -1.14485703 |
| C | 1.73253140  | 1.19186351  | 0.72218990  |
| C | 2.73831373  | 2.08201205  | 0.99262980  |
| H | 0.96324460  | -0.75292691 | 0.60044562  |
| H | -0.96715999 | 1.62130099  | 0.46609325  |
| C | -1.76938103 | -1.01400879 | 2.07329744  |
| C | -2.81084402 | -1.90673817 | -1.20766799 |
| H | -0.98463294 | 0.46458653  | -2.15698993 |
| C | 2.95617666  | 2.56536115  | 2.32687459  |
| C | 3.60425607  | 2.57183524  | -0.04186729 |
| C | -1.29702751 | -0.22308403 | 3.15735952  |
| C | -2.42483916 | -2.23702425 | 2.38739678  |
| C | -4.04847412 | -2.24463441 | -0.63633989 |
| C | -2.43795829 | -2.51008293 | -2.41931779 |
| H | -0.77535151 | 0.70459723  | 2.94138277  |
| C | -1.48999636 | -0.62306007 | 4.47201138  |
| H | -2.76507303 | -2.87929748 | 1.58267670  |

|   |             |             |             |
|---|-------------|-------------|-------------|
| C | -2.60340190 | -2.62824983 | 3.70620014  |
| H | -1.48120781 | -2.25180714 | -2.86557301 |
| C | -3.27256056 | -3.44156468 | -3.03509714 |
| H | -4.35756926 | -1.76239489 | 0.28621917  |
| C | -4.88386822 | -3.17370389 | -1.25467465 |
| H | 2.31620525  | 2.19844843  | 3.12348851  |
| C | 3.95731870  | 3.48353861  | 2.58833655  |
| H | 3.45425056  | 2.21792038  | -1.05711284 |
| C | 4.61358239  | 3.47074098  | 0.25287188  |
| H | -2.96645930 | -3.90707230 | -3.96819982 |
| H | -3.10089195 | -3.57092450 | 3.92039377  |
| H | 4.09995548  | 3.84328249  | 3.60419887  |
| C | -2.14650231 | -1.82578172 | 4.76050570  |
| H | -1.12448671 | 0.00311878  | 5.28204765  |
| C | 4.79866940  | 3.94175210  | 1.56240274  |
| H | 5.26421693  | 3.82297444  | -0.54358387 |
| C | -4.49718861 | -3.77802682 | -2.45334576 |
| H | -5.84026623 | -3.42253367 | -0.80255074 |
| H | -5.14751076 | -4.50484844 | -2.93253199 |
| H | 5.58884917  | 4.65390050  | 1.78054871  |
| H | -2.29430013 | -2.13711769 | 5.79059751  |

int3bhph\_12

E [Hartrees] = -925.2363614199

Gcorr [kcal/mol] = 184.264

|   |             |             |             |
|---|-------------|-------------|-------------|
| C | 1.07171285  | 0.12353708  | -0.57697825 |
| C | -0.29694947 | 0.81849464  | -0.44299607 |
| C | -1.03769488 | 0.02192040  | 0.71453994  |
| C | -1.95294146 | -0.47003352 | -0.23241299 |
| C | -1.37933813 | 0.21971798  | -1.29627416 |
| C | 2.22464259  | 0.61371803  | -0.88504579 |
| C | 3.47195075  | 1.09794598  | -1.19617008 |
| H | 0.96289448  | -0.91863701 | -0.22927752 |
| C | -0.25842952 | 2.32788056  | -0.43377031 |
| C | -0.81887705 | -0.07083119 | 2.11546148  |
| H | -2.79572525 | -1.15170908 | -0.15756900 |
| H | -1.58861695 | 0.31506308  | -2.35479021 |
| C | -0.91561633 | 3.07061974  | 0.55669113  |
| C | 0.42978729  | 3.01472216  | -1.44565458 |
| C | 4.30012072  | 1.69912019  | -0.19383799 |
| C | 3.98109053  | 1.03572263  | -2.53374739 |
| C | 0.23766614  | 0.64920311  | 2.73299958  |
| C | -1.65152595 | -0.87174331 | 2.94116948  |
| H | -2.46865372 | -1.42744581 | 2.48853226  |

|   |             |             |             |
|---|-------------|-------------|-------------|
| C | -1.42974387 | -0.95085002 | 4.30823337  |
| H | 0.88046463  | 1.26946259  | 2.11635814  |
| C | 0.44646246  | 0.56443723  | 4.10307116  |
| H | 0.92449450  | 2.45550525  | -2.23318702 |
| C | 0.47785445  | 4.40955800  | -1.45334833 |
| H | -1.45528575 | 2.55475291  | 1.34421831  |
| C | -0.87020264 | 4.46488575  | 0.54585699  |
| H | 3.36589768  | 0.58309785  | -3.30549050 |
| C | 5.23745267  | 1.53478319  | -2.83184850 |
| H | 3.92825669  | 1.75302300  | 0.82459050  |
| C | 5.54160031  | 2.21434536  | -0.52391240 |
| H | 6.15040231  | 2.67703359  | 0.24863803  |
| C | 6.02653105  | 2.13352657  | -1.83814359 |
| H | 5.61013442  | 1.46978952  | -3.85094934 |
| C | -0.38093087 | -0.23451542 | 4.90136471  |
| H | 1.26014745  | 1.12453366  | 4.55669499  |
| H | -2.07735758 | -1.57123845 | 4.92257744  |
| C | -0.16921688 | 5.14013923  | -0.45596047 |
| H | 1.02187927  | 4.92359664  | -2.24154008 |
| H | -1.38033571 | 5.02381914  | 1.32621410  |
| H | -0.21276428 | -0.29829141 | 5.97261754  |
| H | -0.13083173 | 6.22624179  | -0.46036168 |
| H | 7.00659848  | 2.53112482  | -2.08439935 |

int3bphh\_12

E [Hartrees] = -925.2150927109

Gcorr [kcal/mol] = 184.184

|   |             |             |             |
|---|-------------|-------------|-------------|
| C | 1.11129827  | -0.31902443 | -0.41444563 |
| C | -0.24851399 | 0.46985086  | -0.42780912 |
| C | -1.35583213 | -0.29909977 | 0.35126876  |
| C | -2.06171024 | -0.56046849 | -0.78525025 |
| C | -1.14091355 | 0.24090473  | -1.60032424 |
| C | 2.19953236  | 0.19894312  | 0.11433148  |
| H | 2.44748720  | 1.24130281  | 0.31342816  |
| C | 1.06328486  | -1.76018461 | -0.83359428 |
| H | -0.06542287 | 1.51131635  | -0.15055266 |
| H | -1.42164130 | -0.64070871 | 1.37859843  |
| C | -3.23298144 | -1.39192004 | -1.07857956 |
| C | -1.10431651 | 0.77159868  | -2.91557287 |
| C | 0.05890592  | 1.45645701  | -3.36139031 |
| C | -2.20732560 | 0.66994507  | -3.80441876 |
| C | -4.31529855 | -1.44034246 | -0.18629187 |
| C | -3.26463582 | -2.19007649 | -2.23439269 |
| C | 0.68671943  | -2.13104645 | -2.13243899 |

|   |             |             |             |
|---|-------------|-------------|-------------|
| C | 1.40876732  | -2.76942716 | 0.07879695  |
| H | 1.72134962  | -2.47920420 | 1.07725970  |
| C | 1.34183421  | -4.11234473 | -0.28519532 |
| H | 0.47160632  | -1.36761616 | -2.87097112 |
| C | 0.62360334  | -3.47885363 | -2.49891063 |
| H | -2.41371222 | -2.17910978 | -2.90879143 |
| C | -4.35883362 | -3.01420222 | -2.49120958 |
| H | -4.29582107 | -0.81820354 | 0.70459869  |
| C | -5.40919790 | -2.26379247 | -0.44707128 |
| H | -3.10807571 | 0.16148580  | -3.47868293 |
| C | -2.14616122 | 1.24013818  | -5.06857256 |
| H | 0.91897051  | 1.51268647  | -2.69991496 |
| C | 0.11052574  | 2.00897435  | -4.63239427 |
| C | -0.99057642 | 1.90778884  | -5.49338439 |
| H | 1.01148053  | 2.51981351  | -4.96108391 |
| H | -3.00293601 | 1.16450832  | -5.73283385 |
| C | -5.43511089 | -3.05098604 | -1.60105572 |
| H | -6.24398798 | -2.28863847 | 0.24819313  |
| H | -4.36881068 | -3.63354221 | -3.38404019 |
| C | 0.94180716  | -4.47370260 | -1.57579482 |
| H | 0.33952115  | -3.74594122 | -3.51394186 |
| H | 1.59644364  | -4.88043426 | 0.44087642  |
| H | 0.88940697  | -5.52165218 | -1.85935921 |
| H | -6.28923821 | -3.69104945 | -1.80468337 |
| H | -0.94656972 | 2.34252769  | -6.48787940 |

int3bphph\_12

E [Hartrees] = -925.2034553041

Gcorr [kcal/mol] = 183.561

|   |             |             |             |
|---|-------------|-------------|-------------|
| C | 1.13999031  | -0.22860026 | -0.56016799 |
| C | -0.19236768 | 0.62736296  | -0.50339695 |
| C | -1.31630276 | -0.18851188 | 0.24784912  |
| C | -2.05155892 | -0.31380941 | -0.88093194 |
| C | -1.09622057 | 0.43436585  | -1.68446735 |
| C | 2.30446292  | 0.23215063  | -0.16238502 |
| H | 2.69236426  | 1.23997310  | -0.04675317 |
| C | 0.99765032  | -1.68980120 | -0.89532353 |
| C | 0.02570429  | 2.03117752  | 0.02823938  |
| H | -1.38343294 | -0.56348683 | 1.26189973  |
| H | -2.98031457 | -0.82241803 | -1.11959581 |
| C | -1.00629970 | 0.79207793  | -3.05458533 |
| C | 0.18095588  | 1.36710554  | -3.58410202 |
| C | -2.09692530 | 0.57155618  | -3.93599163 |
| C | 0.61168268  | -2.11685367 | -2.17279306 |

|   |             |             |             |
|---|-------------|-------------|-------------|
| C | 1.28741292  | -2.65872817 | 0.07881342  |
| H | 1.61147632  | -2.32652693 | 1.06066778  |
| C | 1.16088358  | -4.01601752 | -0.20577068 |
| H | 0.42910846  | -1.38921943 | -2.95413802 |
| C | 0.48974738  | -3.47976424 | -2.45956208 |
| H | -3.00906282 | 0.12616753  | -3.54903061 |
| C | -2.00973145 | 0.93264425  | -5.27297532 |
| H | 1.03458036  | 1.50412216  | -2.92731928 |
| C | 0.25826428  | 1.71474571  | -4.92485455 |
| C | -0.83461083 | 1.50546460  | -5.77664827 |
| H | 1.17560958  | 2.14644564  | -5.31551144 |
| H | -2.85700836 | 0.76540475  | -5.93249111 |
| C | 0.75577079  | -4.43304859 | -1.47804239 |
| H | 0.19765720  | -3.79215891 | -3.45913864 |
| H | 1.37681238  | -4.75091984 | 0.56579493  |
| H | 0.65941404  | -5.49227956 | -1.70192310 |
| H | -0.76859217 | 1.77987187  | -6.82548777 |
| C | -0.21231524 | 3.18188128  | -0.72911841 |
| C | 0.43721393  | 2.18296838  | 1.36369757  |
| H | -0.54783576 | 3.09750250  | -1.75598439 |
| C | -0.02838579 | 4.45231105  | -0.17337298 |
| H | 0.62584901  | 1.29608312  | 1.96293941  |
| C | 0.61480952  | 3.44655429  | 1.92075861  |
| C | 0.38545823  | 4.59029412  | 1.14986325  |
| H | -0.21693003 | 5.33357296  | -0.78109868 |
| H | 0.93022314  | 3.53980255  | 2.95665528  |
| H | 0.52494681  | 5.57801706  | 1.58115587  |

int4bhh\_12

E [Hartrees] = -925.2409478606

Gcorr [kcal/mol] = 184.094

|   |             |             |             |
|---|-------------|-------------|-------------|
| C | 1.07316331  | -0.89378597 | 0.66004825  |
| C | -0.22415055 | -0.19330435 | 0.27011538  |
| C | -1.45562709 | -1.02332679 | 0.77872863  |
| C | -1.84469385 | -1.25284958 | -0.56915809 |
| C | -0.77015588 | -0.52553953 | -1.08561110 |
| C | 2.22413337  | -0.35918364 | 0.90617093  |
| C | 3.44473493  | 0.19403598  | 1.19105546  |
| H | 0.89526956  | -1.97498841 | 0.78653967  |
| H | -0.20315560 | 0.87061981  | 0.52919876  |
| C | -1.85903170 | -1.35797448 | 2.09771153  |
| C | -2.95701771 | -1.94603188 | -1.23553082 |
| H | -0.44142238 | -0.27417100 | -2.08714229 |
| C | 3.76063593  | 0.64537767  | 2.51672766  |

|   |             |             |             |
|---|-------------|-------------|-------------|
| C | 4.44877088  | 0.35233817  | 0.17762493  |
| C | -1.21955345 | -0.73164495 | 3.20345340  |
| C | -2.87670991 | -2.31137590 | 2.37956685  |
| C | -4.26593481 | -1.88012573 | -0.73096599 |
| C | -2.72680746 | -2.64913103 | -2.42888751 |
| H | -0.42512403 | -0.01591991 | 3.01348189  |
| C | -1.59308019 | -1.02641336 | 4.50690958  |
| H | -3.35813094 | -2.83260475 | 1.55956043  |
| C | -3.23440765 | -2.60193310 | 3.68796256  |
| H | -1.71560546 | -2.70294302 | -2.82367926 |
| C | -3.77499663 | -3.28581649 | -3.09157372 |
| H | -4.45825955 | -1.31474719 | 0.17596149  |
| C | -5.31406257 | -2.51455920 | -1.39617427 |
| H | 3.01617944  | 0.52575752  | 3.29792667  |
| C | 4.98604245  | 1.22690524  | 2.78893396  |
| H | 4.22773902  | 0.01669938  | -0.83079487 |
| C | 5.67513969  | 0.91425198  | 0.48408372  |
| H | -3.57983991 | -3.83356263 | -4.00971784 |
| H | -4.01024073 | -3.33956576 | 3.87772120  |
| H | 5.20170035  | 1.57068488  | 3.79742020  |
| C | -2.60465953 | -1.96013251 | 4.76306014  |
| H | -1.09223595 | -0.52892269 | 5.33366999  |
| C | 5.95664736  | 1.36331926  | 1.78407231  |
| H | 6.42506015  | 1.01738040  | -0.29615200 |
| C | -5.07171080 | -3.22248403 | -2.57589585 |
| H | -6.32240884 | -2.45172029 | -0.99574591 |
| H | -5.88890322 | -3.71949607 | -3.09171270 |
| H | 6.91941303  | 1.81126558  | 2.01114969  |
| H | -2.89378056 | -2.18991152 | 5.78454771  |

int4bhph\_12

E [Hartrees] = -925.2363702678

Gcorr [kcal/mol] = 183.923

|   |             |             |             |
|---|-------------|-------------|-------------|
| C | 0.63921412  | -0.67470481 | -0.24452664 |
| C | -0.45216631 | 0.41292317  | -0.23785952 |
| C | -1.44986070 | -0.02915565 | 0.91642331  |
| C | -2.43237991 | -0.28880263 | -0.05502858 |
| C | -1.63029796 | 0.10983779  | -1.12006053 |
| C | 1.89844184  | -0.58554894 | -0.51054501 |
| C | 3.24538822  | -0.52933928 | -0.77457376 |
| H | 0.19950993  | -1.60379963 | 0.15843550  |
| C | 0.04925987  | 1.83511206  | -0.31569843 |
| C | -1.32933617 | -0.07576504 | 2.33149097  |
| H | -3.44687068 | -0.67289973 | 0.00740146  |



|   |             |             |             |
|---|-------------|-------------|-------------|
| H | -1.75599230 | 0.18374314  | -2.19341265 |
| C | -0.39024356 | 2.81562279  | 0.58436624  |
| C | 0.95885697  | 2.20126292  | -1.31959375 |
| C | 3.76238577  | -0.84514123 | -2.07274261 |
| C | 4.17866282  | -0.13394333 | 0.23765637  |
| C | -0.12856021 | 0.33144554  | 2.97049893  |
| C | -2.40340427 | -0.51613183 | 3.14936238  |
| H | -3.33285064 | -0.82791592 | 2.68002852  |
| C | -2.27512933 | -0.55244666 | 4.53013060  |
| H | 0.70073834  | 0.67410328  | 2.35975931  |
| C | -0.01449571 | 0.29400093  | 4.35379406  |
| H | 1.29114450  | 1.45993980  | -2.03902805 |
| C | 1.43400362  | 3.51072991  | -1.40642157 |
| H | -1.09642151 | 2.54982082  | 1.36424388  |
| C | 0.08222206  | 4.12508251  | 0.49414046  |
| H | 3.80210298  | 0.10769860  | 1.22667646  |
| C | 5.53023521  | -0.04676258 | -0.04760366 |
| H | 3.06838517  | -1.14696231 | -2.85131779 |
| C | 5.12184314  | -0.77519121 | -2.32435551 |
| H | 5.49581917  | -1.02755425 | -3.31336656 |
| C | 6.01748859  | -0.37043147 | -1.32301926 |
| H | 6.22125659  | 0.26635859  | 0.73085937  |
| C | -1.08196113 | -0.14784277 | 5.14457596  |
| H | 0.91294745  | 0.61119429  | 4.82364845  |
| H | -3.10865844 | -0.89451855 | 5.13831642  |
| C | 1.00009354  | 4.47710949  | -0.49806591 |
| H | 2.14367289  | 3.77368787  | -2.18659584 |
| H | -0.26479702 | 4.87034475  | 1.20527322  |
| H | -0.98732632 | -0.17614281 | 6.22633232  |
| H | 1.37084460  | 5.49657325  | -0.56418154 |
| H | 7.08106023  | -0.30910049 | -1.53353985 |

int4hhh\_12

E [Hartrees] = -925.2270949676

|   |             |             |             |
|---|-------------|-------------|-------------|
| H | 0.25318540  | -2.68831300 | -1.33545026 |
| C | -2.11571315 | -1.04107465 | -0.33758394 |
| C | -0.76818970 | -0.79065974 | -0.39460912 |
| C | 0.13822397  | 0.31494313  | -0.12772339 |
| C | 1.48862417  | 0.20113296  | -0.51085245 |
| H | 1.82211668  | -0.70286261 | -1.01280890 |
| C | 2.39380992  | 1.22988060  | -0.26012503 |
| H | 3.43029097  | 1.12319136  | -0.56902107 |
| C | 1.97176759  | 2.39301289  | 0.38712177  |
| H | 2.67638957  | 3.19665384  | 0.58278077  |

|   |             |             |             |
|---|-------------|-------------|-------------|
| C | 0.63764999  | 2.51358386  | 0.78916663  |
| H | 0.30564087  | 3.40787302  | 1.31002176  |
| C | -0.26974984 | 1.48943498  | 0.53664540  |
| H | -1.29523104 | 1.58211754  | 0.87712899  |
| C | -0.43329261 | -2.26611378 | -0.61300351 |
| C | -3.36075984 | -0.32971628 | -0.09357602 |
| C | -3.52933418 | 1.02775077  | -0.42849875 |
| H | -2.70900383 | 1.56748039  | -0.89128304 |
| C | -4.74419683 | 1.66905002  | -0.20001615 |
| H | -4.85724452 | 2.71614121  | -0.46862819 |
| C | -5.81756352 | 0.97027313  | 0.35977389  |
| H | -6.76419732 | 1.47318615  | 0.53711731  |
| C | -5.66938309 | -0.38235440 | 0.67799694  |
| H | -6.50102085 | -0.93537689 | 1.10661075  |
| C | -4.45792764 | -1.02858752 | 0.44568972  |
| H | -4.34402337 | -2.08087648 | 0.69372657  |
| C | -0.96582019 | -3.08939465 | 0.59651084  |
| H | -1.07443390 | -2.53782344 | 1.53000694  |
| C | -1.16924347 | -4.50520112 | 0.63364930  |
| C | -0.67855171 | -5.32841114 | -0.43927855 |
| C | -1.53387111 | -6.30423156 | -1.01072495 |
| H | -2.55520996 | -6.37047832 | -0.64701839 |
| C | -1.08395306 | -7.14144512 | -2.02428099 |
| H | -1.76638978 | -7.85556604 | -2.47786819 |
| C | 0.25733432  | -7.10519039 | -2.42514425 |
| H | 0.61740373  | -7.79134930 | -3.18679222 |
| C | 1.13627931  | -6.19715533 | -1.82690546 |
| H | 2.18179814  | -6.17742861 | -2.12434155 |
| C | 0.67130700  | -5.29189760 | -0.87768335 |
| H | 1.35221566  | -4.57400797 | -0.42936402 |
| C | -1.90006868 | -2.52593815 | -0.56642316 |
| H | -2.47469760 | -3.19922957 | -1.19282416 |

int4hhph\_12

E [Hartrees] = -925.2214789715

|   |             |             |             |
|---|-------------|-------------|-------------|
| C | 0.23912189  | -2.68077231 | -1.77731983 |
| C | -2.14741378 | -0.66000982 | -0.42776055 |
| C | -0.79169002 | -0.61190399 | -0.40637518 |
| C | 0.23107830  | 0.36726033  | -0.07970222 |
| C | 1.58602333  | -0.00606282 | -0.02695213 |
| H | 1.86444345  | -1.03393370 | -0.23750318 |
| C | 2.56754705  | 0.93270198  | 0.28674130  |
| H | 3.60988111  | 0.62736181  | 0.32532480  |
| C | 2.21693785  | 2.25877340  | 0.54700518  |

|   |             |             |             |
|---|-------------|-------------|-------------|
| H | 2.98349165  | 2.98988681  | 0.78913161  |
| C | 0.87267572  | 2.64294844  | 0.49029429  |
| H | 0.59275758  | 3.67422353  | 0.68918036  |
| C | -0.10985567 | 1.70906425  | 0.17899211  |
| H | -1.15283467 | 2.01189198  | 0.13178259  |
| C | -0.68021448 | -2.10524084 | -0.76130999 |
| H | -2.92399520 | 0.04446477  | -0.14370661 |
| C | -1.38980828 | -2.91742078 | 0.38870926  |
| H | -1.30203469 | -2.41280536 | 1.35128652  |
| C | -1.06032767 | -4.32047058 | 0.39259258  |
| C | -1.74222568 | -5.23477078 | -0.47703746 |
| C | -3.15312131 | -5.21635200 | -0.64499085 |
| H | -3.73102926 | -4.43436969 | -0.16226411 |
| C | -3.79835067 | -6.21615998 | -1.36655631 |
| H | -4.88196016 | -6.20761353 | -1.45250692 |
| C | -3.05410052 | -7.20793886 | -2.01164329 |
| H | -3.55792404 | -7.96908925 | -2.60135769 |
| C | -1.65851217 | -7.22952858 | -1.88399100 |
| H | -1.08077024 | -8.00541517 | -2.37912887 |
| C | -1.01755331 | -6.29186309 | -1.08724107 |
| H | 0.05735408  | -6.32649120 | -0.94279301 |
| C | -2.18898117 | -2.14118370 | -0.71334681 |
| H | -2.81229611 | -2.66617655 | -1.42686984 |
| C | 0.13458125  | -2.25663626 | -3.11072248 |
| C | 1.24927078  | -3.58866675 | -1.43108419 |
| H | -0.63919176 | -1.54219432 | -3.37941745 |
| C | 1.00715230  | -2.74664988 | -4.07952651 |
| H | 1.32885348  | -3.91676527 | -0.39833558 |
| C | 2.12109524  | -4.08289076 | -2.40437479 |
| H | 0.90961145  | -2.41570921 | -5.11015713 |
| C | 2.00326683  | -3.66388975 | -3.72944617 |
| H | 2.89402962  | -4.79326807 | -2.12261595 |
| H | 2.68353680  | -4.04512626 | -4.48632354 |

int4hphph\_12

E [Hartrees] = -925.2057444784

Gcorr [kcal/mol] = 187.157

|   |             |             |             |
|---|-------------|-------------|-------------|
| C | 0.42655819  | -2.58004415 | -1.71582177 |
| C | -2.25205423 | -1.20235175 | -0.07113249 |
| C | -0.93123491 | -0.96707740 | -0.08131672 |
| H | -0.28059277 | -0.19110348 | 0.30857896  |
| C | -0.60973056 | -2.33793830 | -0.68281513 |
| H | -3.11674284 | -0.67823745 | 0.32495955  |
| C | -1.15735448 | -3.41876022 | 0.33130655  |

|   |             |             |             |
|---|-------------|-------------|-------------|
| H | -1.13811903 | -3.02893842 | 1.35060635  |
| C | -0.68675463 | -4.78868828 | 0.24556148  |
| C | -1.04120282 | -5.74374803 | -0.76461377 |
| C | -1.16794092 | -5.56552061 | -2.17026430 |
| H | -0.93498640 | -4.60676943 | -2.61205215 |
| C | -1.55263256 | -6.61685182 | -2.98931708 |
| H | -1.62619548 | -6.45764574 | -4.06175075 |
| C | -1.89419993 | -7.85932439 | -2.44015078 |
| H | -2.22765496 | -8.66701385 | -3.08643943 |
| C | -1.77604124 | -8.06497995 | -1.06365750 |
| H | -2.01189339 | -9.03503401 | -0.63383426 |
| C | -1.29072806 | -7.04535939 | -0.24966369 |
| H | -1.12481657 | -7.21043085 | 0.81030863  |
| C | -2.10826730 | -2.61826880 | -0.63035800 |
| C | -3.04298917 | -3.23873266 | -1.60283382 |
| C | 0.42761023  | -1.79782170 | -2.88355335 |
| C | 1.43947559  | -3.53294799 | -1.54256187 |
| H | -0.32991203 | -1.02884413 | -3.00802846 |
| C | 1.39038345  | -1.99672490 | -3.87016684 |
| H | 1.45727977  | -4.12368438 | -0.62951723 |
| C | 2.40190991  | -3.73411688 | -2.53310931 |
| H | 1.37069867  | -1.39063415 | -4.77211252 |
| C | 2.37899282  | -2.97093296 | -3.70066241 |
| H | 3.17169234  | -4.48695195 | -2.38701928 |
| H | 3.12985882  | -3.12595162 | -4.47071258 |
| C | -3.10783292 | -2.79299191 | -2.93087253 |
| C | -3.91247308 | -4.25781355 | -1.19105976 |
| H | -3.85511315 | -4.61740835 | -0.16796654 |
| C | -4.80891335 | -4.83583399 | -2.08825926 |
| H | -2.44193046 | -2.00119596 | -3.25936412 |
| C | -4.00081847 | -3.37227941 | -3.83164144 |
| H | -4.03082395 | -3.02466806 | -4.86111824 |
| C | -4.85153734 | -4.39858885 | -3.41350223 |
| H | -5.46344331 | -5.63714906 | -1.75632861 |
| H | -5.54293674 | -4.85470952 | -4.11710811 |

int5hhh\_12

E [Hartrees] = -925.2315291485

|   |             |             |             |
|---|-------------|-------------|-------------|
| H | 0.60802424  | -2.96069197 | -0.62930016 |
| C | -1.96959883 | -1.37720413 | -0.18635947 |
| C | -0.65175999 | -1.01981024 | -0.11386177 |
| C | 0.14415672  | 0.17680612  | 0.10717072  |
| C | 1.53766146  | 0.12012148  | -0.08843172 |
| H | 1.98889389  | -0.81223990 | -0.41611958 |

|   |             |             |             |
|---|-------------|-------------|-------------|
| C | 2.33819109  | 1.23978190  | 0.12749012  |
| H | 3.41086938  | 1.17408001  | -0.03438081 |
| C | 1.76597560  | 2.44090383  | 0.55097099  |
| H | 2.38890601  | 3.31529359  | 0.71836657  |
| C | 0.38554554  | 2.50818595  | 0.76566009  |
| H | -0.06598684 | 3.43389557  | 1.11304153  |
| C | -0.41701449 | 1.39250674  | 0.54866204  |
| H | -1.48213138 | 1.44874472  | 0.74557775  |
| C | -0.20724651 | -2.48585927 | -0.09858447 |
| C | -3.27514304 | -0.73889859 | -0.22503427 |
| C | -3.46731408 | 0.54581974  | -0.77019405 |
| H | -2.61741369 | 1.07979442  | -1.18341199 |
| C | -4.73599294 | 1.11787895  | -0.80904175 |
| H | -4.86556809 | 2.10859333  | -1.23679342 |
| C | -5.84104027 | 0.42003985  | -0.31242413 |
| H | -6.83003551 | 0.86889646  | -0.34398423 |
| C | -5.66794157 | -0.86368941 | 0.21146642  |
| H | -6.52318953 | -1.41722853 | 0.59014882  |
| C | -4.40130922 | -1.44165569 | 0.24535758  |
| H | -4.26817029 | -2.44259865 | 0.64757341  |
| C | -0.82695742 | -3.17445181 | 1.16592370  |
| H | -1.00651383 | -2.49507732 | 2.01012151  |
| C | -0.40604637 | -4.54620360 | 1.28130365  |
| C | -0.23623242 | -5.05931075 | 2.62339692  |
| C | 0.66455392  | -6.13954304 | 2.79352270  |
| H | 1.17560060  | -6.51061720 | 1.91006429  |
| C | 0.89886288  | -6.69399258 | 4.04708466  |
| H | 1.61578989  | -7.50242084 | 4.16265954  |
| C | 0.17375684  | -6.23774185 | 5.15326624  |
| H | 0.32671434  | -6.69430308 | 6.12788505  |
| C | -0.76141517 | -5.20631362 | 5.00687824  |
| H | -1.33114126 | -4.86580834 | 5.86778403  |
| C | -0.94166548 | -4.60217911 | 3.76765463  |
| H | -1.65731559 | -3.79127518 | 3.66605624  |
| C | -1.63651695 | -2.86941401 | -0.13343194 |
| H | -2.08957925 | -3.67850136 | -0.69327375 |

int5hhph\_12

E [Hartrees] = -925.2246688708

|   |             |             |             |
|---|-------------|-------------|-------------|
| C | 0.28253338  | -2.93589238 | -1.64535930 |
| C | -2.23141708 | -0.94204762 | -0.45906575 |
| C | -0.88455409 | -0.82788887 | -0.44621520 |
| C | 0.07408433  | 0.22455718  | -0.15270703 |
| C | 1.42417143  | -0.08896825 | 0.08838727  |

|   |             |             |             |
|---|-------------|-------------|-------------|
| H | 1.74614447  | -1.12426199 | 0.03586825  |
| C | 2.34187000  | 0.91674971  | 0.38743827  |
| H | 3.38091428  | 0.65838248  | 0.57345880  |
| C | 1.93110345  | 2.24999485  | 0.44286330  |
| H | 2.64829808  | 3.03367759  | 0.67131446  |
| C | 0.59234715  | 2.57445523  | 0.19592458  |
| H | 0.26834673  | 3.61121867  | 0.23220585  |
| C | -0.32667955 | 1.57377613  | -0.10124372 |
| H | -1.36421195 | 1.82805431  | -0.30203830 |
| C | -0.68657342 | -2.35352497 | -0.67706238 |
| H | -3.04667079 | -0.26747681 | -0.21714444 |
| C | -1.33970293 | -3.05112162 | 0.56297499  |
| H | -1.35161347 | -2.42237129 | 1.46284624  |
| C | -1.42121022 | -4.48623800 | 0.60702723  |
| C | -1.38857085 | -5.08722482 | 1.92134226  |
| C | -0.73129494 | -4.53234832 | 3.05113440  |
| H | -0.22619979 | -3.57508267 | 2.95899402  |
| C | -0.68523236 | -5.21933996 | 4.25901137  |
| H | -0.15088566 | -4.79766913 | 5.10646080  |
| C | -1.34755749 | -6.44545524 | 4.39206234  |
| H | -1.32617908 | -6.97044778 | 5.34370646  |
| C | -2.02143831 | -7.00572711 | 3.30109109  |
| H | -2.52471776 | -7.96303744 | 3.40611336  |
| C | -2.00607940 | -6.35327641 | 2.07344683  |
| H | -2.47698441 | -6.79088533 | 1.19812743  |
| C | -2.18034790 | -2.44106286 | -0.63776754 |
| H | -2.80573398 | -3.10117932 | -1.22529742 |
| C | 0.88895022  | -2.07808742 | -2.58107797 |
| C | 0.61574739  | -4.29943903 | -1.68187835 |
| H | 0.65342604  | -1.01890695 | -2.57264313 |
| C | 1.79559659  | -2.56814334 | -3.52117059 |
| H | 0.12167767  | -4.97078865 | -0.98496408 |
| C | 1.52551021  | -4.78463160 | -2.61944674 |
| H | 2.24954435  | -1.88333770 | -4.23296416 |
| C | 2.12227481  | -3.92407103 | -3.54373446 |
| H | 1.76802330  | -5.84439735 | -2.62642928 |
| H | 2.83323322  | -4.30601628 | -4.27173079 |

int5hphph\_12

E [Hartrees] = -925.2147940188

Gcorr [kcal/mol] = 186.317

|   |             |             |             |
|---|-------------|-------------|-------------|
| C | 0.17583113  | -2.97987440 | -1.60419794 |
| C | -2.44245254 | -1.07980440 | -0.51890275 |
| C | -1.11594281 | -0.90150946 | -0.52485670 |

|   |             |             |             |
|---|-------------|-------------|-------------|
| H | -0.46041656 | -0.05690753 | -0.33958865 |
| C | -0.83880687 | -2.40183861 | -0.69603039 |
| H | -3.30435890 | -0.44270757 | -0.34623421 |
| C | -1.50499000 | -3.11199345 | 0.58010776  |
| H | -1.57791991 | -2.44770552 | 1.45118162  |
| C | -1.32228551 | -4.53072444 | 0.68366765  |
| C | -1.17809961 | -5.07337364 | 2.01066363  |
| C | -0.62243280 | -4.37917084 | 3.11870351  |
| H | -0.28194973 | -3.35560880 | 2.99133610  |
| C | -0.46378737 | -5.00904042 | 4.34745094  |
| H | -0.00596464 | -4.47708836 | 5.17752134  |
| C | -0.91707262 | -6.32183659 | 4.52594296  |
| H | -0.81077650 | -6.80336562 | 5.49464162  |
| C | -1.48837596 | -7.02172749 | 3.45738590  |
| H | -1.82709498 | -8.04481993 | 3.59672420  |
| C | -1.57488589 | -6.42021433 | 2.20696527  |
| H | -1.96171569 | -6.96057635 | 1.34802222  |
| C | -2.32705621 | -2.60558151 | -0.65565609 |
| C | -3.17875167 | -3.45609858 | -1.52615180 |
| C | 1.23794101  | -2.16607812 | -2.02921192 |
| C | 0.08979019  | -4.29172928 | -2.10445852 |
| H | 1.31795468  | -1.14845906 | -1.65744067 |
| C | 2.19460777  | -2.64557755 | -2.92518798 |
| H | -0.71310206 | -4.93113722 | -1.75852319 |
| C | 1.04825749  | -4.76656067 | -2.99641528 |
| H | 3.00940828  | -1.99853347 | -3.23985124 |
| C | 2.10319370  | -3.94893309 | -3.41291730 |
| H | 0.96843319  | -5.78342317 | -3.37224812 |
| H | 2.84616475  | -4.32574344 | -4.11107166 |
| C | -3.24129151 | -3.16164239 | -2.89608237 |
| C | -3.95391817 | -4.50805068 | -1.02380049 |
| H | -3.90091294 | -4.74791828 | 0.03378975  |
| C | -4.77225138 | -5.25321580 | -1.87250639 |
| H | -2.63517717 | -2.35047180 | -3.29049205 |
| C | -4.05787152 | -3.90710685 | -3.74574786 |
| H | -4.08801445 | -3.67322495 | -4.80672818 |
| C | -4.82713832 | -4.95540653 | -3.23597104 |
| H | -5.36595214 | -6.06909106 | -1.46842941 |
| H | -5.46231605 | -5.53879728 | -3.89730312 |

int6hh\_124

E [Hartrees] = -925.3457691944

|   |             |            |            |
|---|-------------|------------|------------|
| C | -2.93845523 | 2.28410688 | 0.09389261 |
| C | -4.16883869 | 1.39667294 | 0.25052667 |

|   |             |             |             |
|---|-------------|-------------|-------------|
| C | -3.17136877 | 0.19357043  | 0.15576497  |
| C | -3.91934063 | -0.20292887 | -1.12037384 |
| C | -4.79844161 | 0.83407717  | -1.03284565 |
| C | -5.93379906 | 1.34900119  | -1.78769657 |
| C | -3.59314449 | -1.25693709 | -2.07702097 |
| C | -3.82543397 | -1.11178357 | -3.45778858 |
| H | -4.26808427 | -0.19208124 | -3.82712595 |
| C | -3.46759550 | -2.12023542 | -4.34913576 |
| H | -3.64754028 | -1.98560056 | -5.41258783 |
| C | -2.86848221 | -3.29479419 | -3.88448088 |
| H | -2.59031689 | -4.07979143 | -4.58238095 |
| C | -2.62309380 | -3.44916431 | -2.51832729 |
| H | -2.15481230 | -4.35716901 | -2.14736960 |
| C | -2.97762342 | -2.43932108 | -1.62554974 |
| H | -2.78941121 | -2.56533781 | -0.56231210 |
| H | -3.08318858 | -0.53157598 | 0.96970686  |
| H | -4.82072653 | 1.53594130  | 1.11785416  |
| C | -2.07089346 | 1.25326988  | -0.00424316 |
| C | -0.64403362 | 1.11174963  | -0.26602456 |
| H | -2.83225180 | 3.36051428  | -0.01054791 |
| C | 2.10132618  | 0.81832203  | -0.80501551 |
| C | 1.58231464  | 2.07090198  | -0.46079341 |
| C | 0.22436256  | 2.21675281  | -0.19388390 |
| C | -0.10980301 | -0.14222009 | -0.60744099 |
| C | 1.25010335  | -0.28586956 | -0.87847412 |
| H | 3.16197449  | 0.70596891  | -1.01310200 |
| H | 2.24020453  | 2.93391928  | -0.39900189 |
| H | -0.17535966 | 3.18959810  | 0.08043456  |
| H | -0.77193714 | -0.99998210 | -0.68158660 |
| H | 1.64504219  | -1.26151093 | -1.14941566 |
| C | -6.32816302 | 2.68730897  | -1.60565686 |
| C | -6.68379116 | 0.54520623  | -2.66823543 |
| H | -6.41530015 | -0.49878061 | -2.79455943 |
| C | -7.77159498 | 1.07241990  | -3.35864082 |
| H | -5.76886065 | 3.31382009  | -0.91548722 |
| C | -7.41326973 | 3.21494163  | -2.30273982 |
| H | -8.34069284 | 0.43583420  | -4.03121841 |
| C | -8.13844059 | 2.41054966  | -3.18445134 |
| H | -7.69607525 | 4.25393844  | -2.15477032 |
| H | -8.98719735 | 2.81951601  | -3.72588303 |

int6hph\_123

E [Hartrees] = -925.3397242881

|   |             |            |            |
|---|-------------|------------|------------|
| C | -2.89720314 | 2.24654597 | 0.21157905 |
|---|-------------|------------|------------|



|   |             |             |             |
|---|-------------|-------------|-------------|
| C | -4.11900837 | 1.35138367  | 0.36378139  |
| C | -3.10048289 | 0.13536862  | 0.24300639  |
| C | -3.87414213 | -0.21192489 | -1.05027043 |
| C | -4.74144746 | 0.81227402  | -0.91816297 |
| H | -5.55275508 | 1.18588333  | -1.53679838 |
| C | -3.65343548 | -1.24880279 | -2.05480178 |
| C | -4.28413529 | -1.17508377 | -3.31129128 |
| H | -4.92783549 | -0.32796979 | -3.53300316 |
| C | -4.07734222 | -2.16066176 | -4.27137877 |
| H | -4.56868049 | -2.08362680 | -5.23780950 |
| C | -3.23424233 | -3.24300874 | -3.99877182 |
| H | -3.07082024 | -4.01055171 | -4.75041517 |
| C | -2.60395013 | -3.32989301 | -2.75658100 |
| H | -1.95070028 | -4.16952817 | -2.53415278 |
| C | -2.81102880 | -2.34352222 | -1.79288499 |
| H | -2.33974291 | -2.43265919 | -0.81971707 |
| C | -2.99327719 | -0.87430637 | 1.34977181  |
| C | -3.92925010 | -1.91716643 | 1.45228085  |
| H | -4.70175300 | -2.01329260 | 0.69486996  |
| C | -3.87292789 | -2.82903888 | 2.50486319  |
| H | -4.60666069 | -3.62899893 | 2.56252094  |
| C | -2.87621791 | -2.72002606 | 3.47761075  |
| H | -2.82814078 | -3.43412216 | 4.29540587  |
| C | -1.93924573 | -1.69015071 | 3.38573916  |
| H | -1.15601259 | -1.59683920 | 4.13374898  |
| C | -1.99694504 | -0.77600585 | 2.33252985  |
| H | -1.25889009 | 0.01686046  | 2.26958642  |
| H | -4.74561755 | 1.45177220  | 1.25443713  |
| C | -2.02099944 | 1.23005032  | 0.07962006  |
| C | -0.59057161 | 1.13338575  | -0.19182450 |
| H | -2.80193567 | 3.32592730  | 0.13278034  |
| C | 2.16558500  | 0.93860308  | -0.72596944 |
| C | 1.59210440  | 2.18052576  | -0.43285404 |
| C | 0.22983933  | 2.27716106  | -0.16708342 |
| C | -0.00095554 | -0.10848497 | -0.48147182 |
| C | 1.36380821  | -0.20374882 | -0.74932659 |
| H | 3.22991741  | 0.86427670  | -0.93212775 |
| H | 2.21103267  | 3.07371263  | -0.40957734 |
| H | -0.21067609 | 3.24271595  | 0.06729108  |
| H | -0.62116477 | -0.99777234 | -0.50353717 |
| H | 1.80106793  | -1.17250378 | -0.97597016 |

int6phh\_124

E [Hartrees] = -925.3382610946

Gcorr [kcal/mol] = 187.918

|   |             |             |             |
|---|-------------|-------------|-------------|
| H | 1.11072091  | -3.42517855 | -1.55501621 |
| C | 0.20536124  | -3.34917007 | -0.95955811 |
| C | -1.05561657 | -3.79674403 | -1.13011824 |
| C | -1.75980611 | -4.58245804 | -2.13579865 |
| C | -1.07763898 | -5.15571818 | -3.22544430 |
| H | -0.00379914 | -5.01348273 | -3.31523137 |
| C | -1.76416882 | -5.89714991 | -4.18168570 |
| H | -1.22327086 | -6.33244535 | -5.01794259 |
| C | -3.14638198 | -6.08293211 | -4.06904383 |
| H | -3.68096286 | -6.66340900 | -4.81613915 |
| C | -3.83395256 | -5.52205125 | -2.99146840 |
| H | -4.90701430 | -5.66512950 | -2.89569691 |
| C | -3.14746676 | -4.78003624 | -2.03108863 |
| H | -3.68227893 | -4.35548975 | -1.18674797 |
| C | -1.59597209 | -3.09624052 | 0.13874834  |
| C | -1.97461816 | -1.62658533 | -0.04811137 |
| H | -2.92707101 | -1.16157043 | -0.28857036 |
| C | -0.71754062 | -1.15747858 | 0.08829062  |
| C | -0.06858682 | 0.14244389  | -0.01252126 |
| C | 1.32935795  | 0.23810703  | 0.08877862  |
| H | 1.91231382  | -0.66525972 | 0.24934157  |
| C | 1.96902640  | 1.47263093  | -0.01541522 |
| H | 3.05156438  | 1.52842458  | 0.06329018  |
| C | 1.22111787  | 2.63384422  | -0.21776661 |
| H | 1.71804950  | 3.59696570  | -0.29670263 |
| C | -0.17226479 | 2.55266327  | -0.31659858 |
| H | -0.75934234 | 3.45380737  | -0.47343116 |
| C | -0.81099196 | 1.32091721  | -0.21529781 |
| H | -1.89348707 | 1.26102403  | -0.29243850 |
| C | -0.10965430 | -2.55241181 | 0.29702265  |
| H | 0.44830141  | -2.74832706 | 1.21667105  |
| C | -2.25373456 | -3.91189171 | 1.21356077  |
| C | -2.07134440 | -5.30282140 | 1.27645932  |
| H | -1.47762648 | -5.79773727 | 0.51393087  |
| C | -2.64924433 | -6.05389680 | 2.29909673  |
| H | -2.49649895 | -7.12979639 | 2.32722992  |
| C | -3.42577577 | -5.43090040 | 3.27863531  |
| H | -3.88045331 | -6.01737832 | 4.07262718  |
| C | -3.61796422 | -4.04939422 | 3.22517909  |
| H | -4.22262791 | -3.55305230 | 3.98005738  |
| C | -3.03838762 | -3.29867119 | 2.20186466  |
| H | -3.18886802 | -2.22324556 | 2.16892652  |

int6paph\_124

E [Hartrees] = -925.3314291460

Gcorr [kcal/mol] = 187.961

|   |             |             |             |
|---|-------------|-------------|-------------|
| H | -2.47473784 | -3.99416655 | -1.32365825 |
| C | -2.32601696 | -3.17076694 | -0.62994634 |
| C | -2.72420563 | -1.89458313 | -0.61292463 |
| H | -3.31839249 | -1.28455089 | -1.28804463 |
| C | -1.95875738 | -1.52051099 | 0.65889793  |
| C | -0.46680821 | -1.20151211 | 0.44036091  |
| C | -0.07773994 | -2.49092289 | 0.44010963  |
| H | 0.87669087  | -2.98292680 | 0.27198501  |
| C | -1.47297579 | -3.07756506 | 0.64244553  |
| C | -1.75347654 | -3.97508186 | 1.80358571  |
| C | -2.95142438 | -4.70196389 | 1.87891356  |
| H | -3.66101794 | -4.64461226 | 1.05856554  |
| C | -3.24314105 | -5.48629757 | 2.99429420  |
| H | -4.17682010 | -6.04169809 | 3.03226241  |
| C | -2.34179086 | -5.55872891 | 4.05810928  |
| H | -2.56771781 | -6.17170487 | 4.92663345  |
| C | -1.14764838 | -4.83792242 | 3.99674896  |
| H | -0.43950433 | -4.88512408 | 4.82019427  |
| C | -0.85747964 | -4.05413196 | 2.88076323  |
| H | 0.06998416  | -3.48988658 | 2.84227673  |
| C | 0.18883563  | 0.08342257  | 0.23164066  |
| C | -0.56772751 | 1.26798688  | 0.21843034  |
| H | -1.63978337 | 1.21505082  | 0.38281915  |
| C | 0.04789805  | 2.50176142  | 0.01069068  |
| H | -0.55155064 | 3.40819160  | 0.00347181  |
| C | 1.42842615  | 2.57383097  | -0.18247036 |
| H | 1.90848851  | 3.53559323  | -0.34180599 |
| C | 2.19302030  | 1.40204310  | -0.16643257 |
| H | 3.26853928  | 1.45232274  | -0.31485677 |
| C | 1.58066043  | 0.17006212  | 0.03924118  |
| H | 2.17726578  | -0.73840694 | 0.05147750  |
| C | -2.68213401 | -0.97262420 | 1.84602552  |
| C | -4.08198657 | -1.03173364 | 1.92264234  |
| H | -4.64392177 | -1.43717429 | 1.08620413  |
| C | -4.75588388 | -0.58738105 | 3.05991054  |
| H | -5.84083435 | -0.64235889 | 3.09810513  |
| C | -4.04180002 | -0.07485998 | 4.14431302  |
| H | -4.56625229 | 0.27387430  | 5.02997760  |
| C | -2.64832254 | -0.01130924 | 4.08074411  |
| H | -2.08185182 | 0.38667895  | 4.91875069  |
| C | -1.97545776 | -0.45519778 | 2.94355605  |

H -0.89224739 -0.39821482 2.90189274

int7hh\_124

E [Hartrees] = -925.3118653093

Gcorr [kcal/mol] = 187.911

|   |             |             |             |
|---|-------------|-------------|-------------|
| C | -2.39068061 | 2.15663256  | -1.03751128 |
| C | -3.82089090 | 2.32369927  | -1.33126291 |
| C | -3.09902047 | 0.16549596  | -0.15398866 |
| C | -3.93064097 | 0.01637768  | -1.24354637 |
| C | -4.73521850 | 1.28388271  | -1.35127430 |
| C | -6.15722357 | 1.37123802  | -1.68795836 |
| C | -3.50756241 | -0.69989235 | -2.44443699 |
| C | -3.97924469 | -0.37876308 | -3.73523215 |
| H | -4.68029686 | 0.44009973  | -3.85920957 |
| C | -3.53474325 | -1.08393816 | -4.84802522 |
| H | -3.90532708 | -0.81971718 | -5.83511127 |
| C | -2.60903692 | -2.12390066 | -4.70459491 |
| H | -2.26727774 | -2.67437543 | -5.57706468 |
| C | -2.14097745 | -2.46158190 | -3.43256365 |
| H | -1.43149978 | -3.27592339 | -3.31084853 |
| C | -2.60056081 | -1.77251462 | -2.31374314 |
| H | -2.27660568 | -2.05925271 | -1.31773833 |
| H | -3.60473298 | 0.63033871  | 0.70234165  |
| H | -4.13742078 | 3.32613156  | -1.61707444 |
| C | -1.88674783 | 0.98881864  | -0.50674196 |
| C | -0.49917130 | 0.68755350  | -0.17524773 |
| H | -1.74677860 | 3.01460518  | -1.22454851 |
| C | 2.15648070  | 0.02282646  | 0.49970660  |
| C | 1.88736425  | 1.15846047  | -0.27227398 |
| C | 0.57853062  | 1.48747919  | -0.60766146 |
| C | -0.21050606 | -0.45809331 | 0.59011252  |
| C | 1.10065693  | -0.78425048 | 0.92785990  |
| H | 3.18082394  | -0.23202206 | 0.75753385  |
| H | 2.70466934  | 1.78542263  | -0.61913803 |
| H | 0.38878602  | 2.35994446  | -1.22586503 |
| H | -1.03735506 | -1.08315779 | 0.91674114  |
| H | 1.29900727  | -1.67106346 | 1.52412465  |
| C | -6.83232337 | 2.59632729  | -1.86591689 |
| C | -6.89834836 | 0.18194190  | -1.82832387 |
| H | -6.39442097 | -0.76834327 | -1.67802295 |
| C | -8.25156185 | 0.21235574  | -2.15675652 |
| H | -6.29778211 | 3.53332730  | -1.74136620 |
| C | -8.18500122 | 2.62476114  | -2.18862226 |
| H | -8.79951296 | -0.71996491 | -2.26424557 |

|   |             |            |             |
|---|-------------|------------|-------------|
| C | -8.90255933 | 1.43356630 | -2.34020240 |
| H | -8.68513367 | 3.58079932 | -2.31992291 |
| H | -9.95941270 | 1.45996616 | -2.59096162 |

int7hph\_123

E [Hartrees] = -925.3125738785

Gcorr [kcal/mol] = 188.206

|   |             |             |             |
|---|-------------|-------------|-------------|
| C | -2.47034081 | 1.69004731  | 1.19416202  |
| C | -3.62077494 | 1.70837170  | 0.45432748  |
| C | -2.32672636 | -0.53837562 | 0.48745020  |
| C | -3.09614639 | -0.37557045 | -0.80438834 |
| C | -3.86864134 | 0.74729414  | -0.64184920 |
| H | -4.67244160 | 0.98050715  | -1.33849733 |
| C | -3.12210436 | -1.31997549 | -1.91741801 |
| C | -3.71539049 | -1.00981006 | -3.15738764 |
| H | -4.14407307 | -0.02450435 | -3.31555979 |
| C | -3.72947566 | -1.94037163 | -4.19090180 |
| H | -4.18731976 | -1.68089730 | -5.14191147 |
| C | -3.14459153 | -3.19956355 | -4.01692151 |
| H | -3.15274761 | -3.92206667 | -4.82846633 |
| C | -2.54094345 | -3.51615600 | -2.79864884 |
| H | -2.07942646 | -4.48960461 | -2.65514187 |
| C | -2.52636108 | -2.58581905 | -1.76159349 |
| H | -2.06243004 | -2.83122297 | -0.81066351 |
| C | -2.97215691 | -1.20225849 | 1.60445814  |
| C | -4.13645127 | -1.99236532 | 1.45147085  |
| H | -4.59736143 | -2.07388597 | 0.47220595  |
| C | -4.70206514 | -2.64223131 | 2.54051703  |
| H | -5.59905810 | -3.24078875 | 2.40329692  |
| C | -4.12611518 | -2.52940248 | 3.81273346  |
| H | -4.56845028 | -3.04645126 | 4.65999176  |
| C | -2.96246102 | -1.77335829 | 3.97903475  |
| H | -2.49690689 | -1.69950015 | 4.95852944  |
| C | -2.37883638 | -1.13861300 | 2.88744077  |
| H | -1.44385574 | -0.59758403 | 2.99951542  |
| H | -4.34579207 | 2.50989747  | 0.58997346  |
| C | -1.55781596 | 0.62822022  | 0.69218495  |
| C | -0.47634645 | 0.97409579  | -0.21547813 |
| H | -2.19536104 | 2.51635260  | 1.84787419  |
| C | 1.64684826  | 1.54724364  | -1.98608024 |
| C | 0.93652437  | 2.58748703  | -1.37439200 |
| C | -0.11397197 | 2.30895463  | -0.50843047 |
| C | 0.27632393  | -0.06241501 | -0.81492009 |
| C | 1.30513232  | 0.22122844  | -1.70698692 |

|   |             |             |             |
|---|-------------|-------------|-------------|
| H | 2.46632446  | 1.77036752  | -2.66391382 |
| H | 1.19816201  | 3.62078631  | -1.58808231 |
| H | -0.68554505 | 3.12290768  | -0.07305279 |
| H | 0.04207720  | -1.09055258 | -0.55441527 |
| H | 1.85821459  | -0.59272435 | -2.16850944 |

int7pnhz\_124

E [Hartrees] = -925.3118717105

Gcorr [kcal/mol] = 188.498

|   |             |             |             |
|---|-------------|-------------|-------------|
| H | 0.62829317  | -4.00026403 | -2.27979133 |
| C | -0.10507156 | -3.36324125 | -1.78675321 |
| C | -1.44439707 | -3.71430108 | -1.81031730 |
| C | -2.03659874 | -4.87056166 | -2.48493309 |
| C | -1.31915107 | -5.68685865 | -3.38337061 |
| H | -0.28215107 | -5.45998712 | -3.61230442 |
| C | -1.92635239 | -6.77796162 | -3.99611323 |
| H | -1.35431556 | -7.39254044 | -4.68637128 |
| C | -3.26581751 | -7.08358638 | -3.73288387 |
| H | -3.73718983 | -7.93562217 | -4.21493855 |
| C | -3.99359880 | -6.27836889 | -2.85492994 |
| H | -5.03720102 | -6.50037994 | -2.64836947 |
| C | -3.38891741 | -5.18206066 | -2.24464226 |
| H | -3.95805776 | -4.55159711 | -1.56779987 |
| C | -2.12166654 | -2.84850714 | -0.78204719 |
| C | -1.76086751 | -1.54711403 | -1.05958952 |
| H | -1.77436262 | -1.32533143 | -2.13468525 |
| C | -0.38834897 | -1.23916031 | -0.51773229 |
| C | 0.00764856  | -0.05669859 | 0.23803176  |
| C | 1.30347181  | 0.10927801  | 0.76863082  |
| H | 2.04647608  | -0.67085853 | 0.63209110  |
| C | 1.63566963  | 1.25141062  | 1.48903230  |
| H | 2.63867223  | 1.35842936  | 1.89386972  |
| C | 0.68517201  | 2.25600750  | 1.70158409  |
| H | 0.94817282  | 3.14590039  | 2.26692898  |
| C | -0.60496167 | 2.10200940  | 1.19028896  |
| H | -1.35220413 | 2.87415606  | 1.35369120  |
| C | -0.94053359 | 0.95706393  | 0.47183161  |
| H | -1.94374029 | 0.82778083  | 0.07445306  |
| C | 0.43134177  | -2.21347739 | -1.04527126 |
| H | 1.51482577  | -2.14386364 | -0.96234376 |
| C | -2.30158903 | -3.32297789 | 0.58779354  |
| C | -2.04985502 | -4.65595277 | 0.97729694  |
| H | -1.69662047 | -5.37005896 | 0.24056615  |
| C | -2.22495202 | -5.05344295 | 2.29808597  |

|   |             |             |            |
|---|-------------|-------------|------------|
| H | -2.02175115 | -6.08311515 | 2.58092170 |
| C | -2.65214770 | -4.13488507 | 3.26389019 |
| H | -2.79072850 | -4.45126947 | 4.29428232 |
| C | -2.91614648 | -2.81443570 | 2.89241393 |
| H | -3.25994840 | -2.09765258 | 3.63357492 |
| C | -2.76372581 | -2.41831448 | 1.56670469 |
| H | -3.01128176 | -1.40594686 | 1.26168755 |

int7p.php\_124

E [Hartrees] = -925.3027041130

Gcorr [kcal/mol] = 187.723

|   |             |             |             |
|---|-------------|-------------|-------------|
| H | -2.84570443 | -3.65571422 | -0.48634252 |
| C | -2.51497716 | -2.78609312 | 0.08073687  |
| C | -2.72013139 | -1.51031735 | -0.33981159 |
| H | -2.96846144 | -1.19598941 | -1.34970670 |
| C | -2.24243493 | -0.66896454 | 0.77736626  |
| C | -0.77226956 | -0.73670011 | 0.88274445  |
| C | -0.54219383 | -2.00107031 | 1.40442603  |
| H | 0.43358280  | -2.32330222 | 1.76864693  |
| C | -1.59727188 | -2.97139854 | 1.22570437  |
| C | -1.61298401 | -4.20620627 | 2.00127264  |
| C | -2.50032044 | -5.26842452 | 1.70324730  |
| H | -3.22701542 | -5.15740666 | 0.90624951  |
| C | -2.47401822 | -6.45827534 | 2.42244354  |
| H | -3.16501839 | -7.25601289 | 2.16231011  |
| C | -1.57843209 | -6.62692778 | 3.48206988  |
| H | -1.56604338 | -7.55362201 | 4.04916792  |
| C | -0.71977311 | -5.57797119 | 3.82221528  |
| H | -0.03866784 | -5.68312390 | 4.66278772  |
| C | -0.74442435 | -4.38703979 | 3.10526171  |
| H | -0.10148489 | -3.57127986 | 3.41758373  |
| C | 0.16103336  | 0.19696093  | 0.28438108  |
| C | -0.26822174 | 1.50379151  | -0.03111493 |
| H | -1.29307457 | 1.78746528  | 0.19583641  |
| C | 0.60642822  | 2.42766655  | -0.59813543 |
| H | 0.25281134  | 3.42702969  | -0.83861542 |
| C | 1.93777611  | 2.07995988  | -0.83685183 |
| H | 2.62436020  | 2.80366004  | -1.26749212 |
| C | 2.38219823  | 0.79074984  | -0.51833761 |
| H | 3.41441321  | 0.51016922  | -0.71221918 |
| C | 1.50583731  | -0.14372220 | 0.02061569  |
| H | 1.84636317  | -1.15567653 | 0.21990007  |
| C | -3.05745014 | -0.40086298 | 1.93110808  |
| C | -4.45926357 | -0.62426375 | 1.91920973  |

|   |             |             |            |
|---|-------------|-------------|------------|
| H | -4.91002376 | -1.06298665 | 1.03496851 |
| C | -5.23673862 | -0.30481875 | 3.02149379 |
| H | -6.30698969 | -0.49276103 | 2.99938754 |
| C | -4.65208325 | 0.26951628  | 4.15926179 |
| H | -5.26855571 | 0.53328454  | 5.01422075 |
| C | -3.27762914 | 0.53311782  | 4.17555780 |
| H | -2.82493953 | 0.99919787  | 5.04675230 |
| C | -2.49090985 | 0.22019711  | 3.07531235 |
| H | -1.42967883 | 0.44626468  | 3.07506714 |

phactlen

E [Hartrees] = -308.4006856781

Gcorr [kcal/mol] = 50.107

|   |             |             |             |
|---|-------------|-------------|-------------|
| C | -0.36387672 | -0.63026128 | 0.00004771  |
| C | 1.04379219  | -0.61916396 | -0.00003589 |
| C | 1.73620969  | 0.58931009  | -0.00010789 |
| C | 1.03953034  | 1.80042608  | -0.00009885 |
| C | -0.35765354 | 1.79830502  | 0.00000736  |
| C | -1.05804267 | 0.59442441  | 0.00008181  |
| C | -1.07862388 | -1.86808492 | 0.00005780  |
| C | -1.68354652 | -2.91593281 | 0.00012006  |
| H | 1.58072546  | -1.56273248 | -0.00003997 |
| H | 2.82282193  | 0.58612788  | -0.00017235 |
| H | 1.58284576  | 2.74141601  | -0.00017091 |
| H | -0.90368940 | 2.73777173  | 0.00002628  |
| H | -2.14367975 | 0.58769559  | 0.00016644  |
| H | -2.21681288 | -3.83930139 | 0.00011840  |

ts1b\_14zez

E [Hartrees] = -616.7718927211

|   |             |            |             |
|---|-------------|------------|-------------|
| C | -0.79390643 | 1.22383252 | 0.07441606  |
| C | 0.46214715  | 1.12887538 | 0.05402912  |
| C | -2.74053142 | 2.99441350 | -0.13222875 |
| C | -1.48953129 | 2.90458727 | -0.01413803 |
| C | 1.80500257  | 1.53851359 | -0.00122538 |
| C | -4.07743523 | 2.57922039 | -0.25200052 |
| H | -1.62887635 | 0.54508128 | 0.13173481  |
| H | -0.65900922 | 3.58795938 | 0.05216692  |
| C | 2.47449975  | 1.66678535 | -1.24536763 |
| C | 2.52711791  | 1.82228539 | 1.18640042  |
| C | -4.88188022 | 2.38105951 | 0.89954481  |
| C | -4.65856779 | 2.35971654 | -1.52741516 |
| H | -4.44666836 | 2.55170808 | 1.87945383  |
| C | -6.20340877 | 1.97099323 | 0.77326902  |



|   |             |            |             |
|---|-------------|------------|-------------|
| H | 2.02399728  | 1.72164782 | 2.14321539  |
| C | 3.85501617  | 2.22632855 | 1.12357874  |
| H | 1.93028867  | 1.44797058 | -2.15897302 |
| C | 3.80309407  | 2.07014681 | -1.29166246 |
| H | -4.05105637 | 2.51264687 | -2.41412167 |
| C | -5.98192737 | 1.95158497 | -1.63734827 |
| C | -6.76158101 | 1.75467590 | -0.49171277 |
| H | -6.41141415 | 1.78330381 | -2.62141983 |
| H | -6.80513881 | 1.81795716 | 1.66526350  |
| C | 4.50088763  | 2.35213229 | -0.11154568 |
| H | 4.30078589  | 2.16800090 | -2.25285917 |
| H | 5.54002267  | 2.66597658 | -0.15409140 |
| H | 4.39307921  | 2.44546465 | 2.04206762  |
| H | -7.79616045 | 1.43656040 | -0.58421656 |

ts1b\_14zzz0deg

E [Hartrees] = -616.7694317831

Gcorr [kcal/mol] = 114.371

|   |             |            |             |
|---|-------------|------------|-------------|
| C | -0.66120174 | 1.32752403 | 0.31073916  |
| C | 0.54775419  | 0.99960293 | 0.21382217  |
| C | -0.58777597 | 3.97084005 | -0.38375628 |
| C | -1.27338719 | 2.92143351 | -0.46796336 |
| C | 1.91809477  | 1.16350964 | -0.06969878 |
| C | 0.54626575  | 4.76303067 | -0.11654921 |
| H | -1.55466233 | 0.91840520 | 0.75536211  |
| H | -2.21803641 | 2.63079401 | -0.89981833 |
| C | 2.49578108  | 0.64227540 | -1.25217178 |
| C | 2.74258115  | 1.88864783 | 0.82660985  |
| C | 1.63223694  | 4.77185825 | -1.02730726 |
| C | 0.64446283  | 5.53820251 | 1.06381221  |
| H | 1.56684888  | 4.16852585 | -1.92703000 |
| C | 2.78118308  | 5.49649060 | -0.74356935 |
| H | 2.30103618  | 2.30163956 | 1.72785993  |
| C | 4.07878942  | 2.11309776 | 0.52688316  |
| H | 1.87279267  | 0.07719028 | -1.93873444 |
| C | 3.83568124  | 0.87667515 | -1.54065964 |
| H | -0.18750010 | 5.54441142 | 1.76137973  |
| C | 1.80264890  | 6.25785318 | 1.33616676  |
| C | 2.87669944  | 6.23909073 | 0.43983328  |
| H | 1.87198059  | 6.83604243 | 2.25387598  |
| H | 3.61508801  | 5.47287794 | -1.43981543 |
| C | 4.63272129  | 1.61426539 | -0.65854558 |
| H | 4.26323115  | 0.48495006 | -2.45992675 |
| H | 5.67828831  | 1.79653165 | -0.89089950 |

|   |            |            |            |
|---|------------|------------|------------|
| H | 4.69147000 | 2.69265069 | 1.21204680 |
| H | 3.78019707 | 6.80103941 | 0.65960975 |

ts1b\_14zzz90deg

E [Hartrees] = -616.7719504035

Gcorr [kcal/mol] = 111.373

|   |             |             |             |
|---|-------------|-------------|-------------|
| C | -0.69304290 | 1.33515867  | -0.44961784 |
| C | 0.40460595  | 0.80503130  | -0.13229799 |
| C | -0.91377267 | 3.86657896  | 0.12901442  |
| C | -1.24428190 | 2.71531477  | 0.51878975  |
| C | 1.66493314  | 0.62699253  | 0.45932955  |
| C | -0.23930514 | 4.88558401  | -0.56156712 |
| H | -1.44289540 | 1.16426609  | -1.20832553 |
| H | -1.81283138 | 2.31263558  | 1.34441377  |
| C | 1.88858213  | -0.37778528 | 1.43388186  |
| C | 2.75542342  | 1.45154823  | 0.07578187  |
| C | 1.13509465  | 5.13236769  | -0.30415120 |
| C | -0.90425368 | 5.69824951  | -1.51375003 |
| H | 1.65208784  | 4.50773215  | 0.41816865  |
| C | 1.80580171  | 6.14567103  | -0.97709583 |
| H | 2.58853255  | 2.22846722  | -0.66434344 |
| C | 4.00772952  | 1.27351380  | 0.64977647  |
| H | 1.06334032  | -1.01972649 | 1.72680310  |
| C | 3.14429712  | -0.53472503 | 2.00780158  |
| H | -1.95770862 | 5.52370510  | -1.71036326 |
| C | -0.21585605 | 6.69965343  | -2.18772311 |
| C | 1.13849328  | 6.93278884  | -1.92314638 |
| H | -0.73769411 | 7.30877895  | -2.92108772 |
| H | 2.85845943  | 6.32103510  | -0.77074760 |
| C | 4.21065334  | 0.28408976  | 1.61915456  |
| H | 3.29769370  | -1.30424189 | 2.75983952  |
| H | 5.19123519  | 0.15246635  | 2.06779561  |
| H | 4.83222025  | 1.91395910  | 0.34724235  |
| H | 1.66944154  | 7.72092142  | -2.44948915 |

ts1c

E [Hartrees] = -616.7412492196

|   |             |             |             |
|---|-------------|-------------|-------------|
| C | -0.99716164 | 0.65281424  | 0.24737569  |
| C | -1.21358146 | -0.17436080 | 1.39466922  |
| C | 0.17227389  | 0.81176655  | -0.40856138 |
| C | 1.11673616  | -0.44163404 | -0.62566817 |
| C | 0.88734153  | -1.54969179 | -1.54114332 |
| C | 1.87702486  | 0.10545056  | 0.22568767  |
| H | 0.38787155  | 1.60778038  | -1.11520620 |

|   |             |             |             |
|---|-------------|-------------|-------------|
| H | 2.58495007  | 0.48206027  | 0.93107226  |
| C | -0.42326358 | -0.05362686 | 2.56451907  |
| C | -2.27494780 | -1.11189667 | 1.40406607  |
| C | -0.33993363 | -1.67919240 | -2.20574840 |
| C | 1.89639242  | -2.50585890 | -1.74800223 |
| H | -1.11372863 | -0.93723634 | -2.03217215 |
| C | -0.55636107 | -2.75551402 | -3.06500518 |
| H | 2.84409629  | -2.39865074 | -1.22804096 |
| C | 1.67486048  | -3.57615164 | -2.60885387 |
| H | 0.37164355  | 0.68589344  | 2.58379780  |
| C | -0.68410860 | -0.83798825 | 3.68440864  |
| H | -2.90695808 | -1.19040445 | 0.52415771  |
| C | -2.48743329 | -1.93452234 | 2.50373396  |
| C | 0.44828409  | -3.70337434 | -3.26965797 |
| H | -1.51052849 | -2.85351911 | -3.57512989 |
| H | 2.45750288  | -4.31331001 | -2.76573144 |
| H | -3.28707405 | -2.67058028 | 2.47874105  |
| C | -1.70257088 | -1.79486310 | 3.65493881  |
| H | -0.08004468 | -0.71571365 | 4.58037863  |
| H | 0.27794866  | -4.54047903 | -3.94116024 |
| H | -1.89521586 | -2.41531363 | 4.52596216  |

ts2b\_14zzz\_eze

E [Hartrees] = -616.7810636545

|   |             |             |             |
|---|-------------|-------------|-------------|
| C | -0.86033952 | 1.37536743  | -0.04962456 |
| C | 0.39399492  | 0.99055346  | -0.01985765 |
| C | -0.69929975 | 3.87979569  | -0.15594932 |
| C | -1.38474742 | 2.76129814  | -0.11393229 |
| C | 1.56477644  | 0.26387294  | 0.02507773  |
| C | -0.31403628 | 5.20292579  | -0.21020230 |
| H | -1.64069167 | 0.60452750  | -0.02475198 |
| H | -2.48013051 | 2.82302967  | -0.12579646 |
| C | 2.18555584  | -0.06211382 | 1.27359852  |
| C | 2.21271554  | -0.17108724 | -1.17549328 |
| C | -0.10351991 | 5.96204743  | 0.98535385  |
| C | -0.08895680 | 5.85693680  | -1.46377292 |
| H | -0.26291316 | 5.47906903  | 1.94447349  |
| C | 0.28572013  | 7.28976364  | 0.91755820  |
| H | 1.75882280  | 0.07346285  | -2.13087824 |
| C | 3.39006280  | -0.89854122 | -1.11681322 |
| H | 1.71088148  | 0.26604386  | 2.19315500  |
| C | 3.36327589  | -0.79061943 | 1.30585430  |
| H | -0.23736503 | 5.29349743  | -2.37979527 |
| C | 0.29993380  | 7.18585983  | -1.50534037 |

|   |            |             |             |
|---|------------|-------------|-------------|
| C | 0.48941671 | 7.91512402  | -0.32177785 |
| H | 0.45652195 | 7.66713808  | -2.46736414 |
| H | 0.43137115 | 7.85169822  | 1.83662170  |
| C | 3.97587850 | -1.21692730 | 0.11773490  |
| H | 3.81404309 | -1.03566040 | 2.26419055  |
| H | 4.89821621 | -1.78935929 | 0.15339223  |
| H | 3.86161369 | -1.22752994 | -2.03934043 |
| H | 0.79263990 | 8.95719258  | -0.36455118 |

ts2b\_trmr

E [Hartrees] = -925.1767150398

E [Hartrees] = -925.1767150398

Gcorr [kcal/mol] = 177.852

|   |              |             |             |
|---|--------------|-------------|-------------|
| H | -4.31671589  | 1.25912887  | -0.09109834 |
| C | -4.08790966  | 0.20068056  | -0.03087824 |
| C | -2.90623665  | -0.33404618 | -0.12911008 |
| C | -2.26397065  | -1.59935896 | -0.17356636 |
| C | -2.36863033  | -2.41469812 | -1.32584091 |
| H | -2.98019097  | -2.07337627 | -2.15572208 |
| C | -1.69448463  | -3.62989277 | -1.39365983 |
| H | -1.78865314  | -4.24865517 | -2.28231109 |
| C | -0.89356844  | -4.05291210 | -0.32796351 |
| H | -0.35777077  | -4.99603469 | -0.39026721 |
| C | -0.77884338  | -3.25608099 | 0.81599738  |
| H | -0.14648343  | -3.57516073 | 1.63963052  |
| C | -1.45070716  | -2.04263536 | 0.89565879  |
| H | -1.34526023  | -1.40964481 | 1.77061345  |
| C | -5.34861558  | -0.71088679 | 0.20265479  |
| H | -5.11137018  | -1.77076452 | 0.24959647  |
| C | -6.51690853  | -0.17388884 | 0.30555975  |
| C | -7.42986761  | 0.87524007  | 0.33970380  |
| C | -7.77438166  | 1.51054988  | 1.56933190  |
| H | -7.29637080  | 1.17181483  | 2.48336008  |
| C | -8.69816724  | 2.54454608  | 1.59427881  |
| H | -8.94328389  | 3.02129995  | 2.53988566  |
| C | -9.31470964  | 2.97949433  | 0.41327458  |
| H | -10.03935579 | 3.78810912  | 0.44165709  |
| C | -8.99366711  | 2.36381435  | -0.80407693 |
| H | -9.46853314  | 2.69987955  | -1.72226968 |
| C | -8.07316468  | 1.32761933  | -0.85018320 |
| H | -7.82487453  | 0.84806631  | -1.79209416 |
| C | -1.22472653  | 1.30775041  | -0.35972162 |
| C | -0.11791296  | 0.78825073  | -0.25293357 |
| C | 0.97631437   | -0.10025923 | -0.11156990 |

|   |             |             |             |
|---|-------------|-------------|-------------|
| H | -1.92571195 | 2.09713141  | -0.52706667 |
| C | 2.34366983  | -1.90056206 | -1.00426699 |
| C | 1.31475980  | -0.97973507 | -1.16370501 |
| C | 1.71548187  | -0.15828183 | 1.09046612  |
| C | 2.74514186  | -1.08188324 | 1.23700017  |
| C | 3.06258539  | -1.95820399 | 0.19421832  |
| H | 2.58281141  | -2.58316658 | -1.81522618 |
| H | 0.73696700  | -0.94833295 | -2.08158392 |
| H | 1.46003140  | 0.51803018  | 1.90059210  |
| H | 3.30284264  | -1.12140859 | 2.16899554  |
| H | 3.86519739  | -2.68060595 | 0.31457313  |

ts2c\_12

E [Hartrees] = -616.7370216970

|   |             |             |             |
|---|-------------|-------------|-------------|
| C | -0.68955460 | 0.44568485  | 0.10926356  |
| C | -1.00040168 | -0.30856073 | 1.32944742  |
| C | 0.57614812  | 1.01967506  | -0.10238597 |
| C | 0.90741730  | -0.56201255 | -0.46682374 |
| C | 0.72508178  | -1.60031403 | -1.45859097 |
| C | 1.77374767  | 0.18509818  | 0.19319300  |
| H | 0.71065288  | 1.84666359  | -0.81335143 |
| H | 2.84778932  | 0.30550956  | 0.28146386  |
| C | -0.59284558 | 0.15399761  | 2.59891066  |
| C | -1.81940011 | -1.45496659 | 1.27852706  |
| C | -0.45665536 | -1.67769936 | -2.21554695 |
| C | 1.73948531  | -2.55714805 | -1.64838872 |
| H | -1.23112896 | -0.93815911 | -2.03721225 |
| C | -0.60633808 | -2.68572342 | -3.16532237 |
| H | 2.64858692  | -2.50055949 | -1.05613536 |
| C | 1.57077865  | -3.57300164 | -2.58434391 |
| H | 0.03552207  | 1.03861699  | 2.66283199  |
| C | -0.99803361 | -0.49728896 | 3.76344249  |
| H | -2.15799188 | -1.81186186 | 0.30979522  |
| C | -2.18526283 | -2.12765887 | 2.44033290  |
| C | 0.40089546  | -3.63633568 | -3.34841684 |
| H | -1.51716873 | -2.73645269 | -3.75517887 |
| H | 2.35379744  | -4.31314225 | -2.72367076 |
| H | -2.80269970 | -3.02030063 | 2.37270592  |
| C | -1.78495350 | -1.64864085 | 3.69248253  |
| H | -0.68624352 | -0.11039573 | 4.73106029  |
| H | 0.27474619  | -4.42833797 | -4.08146319 |
| H | -2.09141882 | -2.16144332 | 4.60029011  |

ts2c\_13

E [Hartrees] = -616.7362910048

|   |             |             |             |
|---|-------------|-------------|-------------|
| C | -0.74303813 | 0.30768910  | -0.03961039 |
| C | -0.96589330 | -0.32016744 | 1.27030090  |
| C | 0.50965443  | 0.87147208  | -0.36136636 |
| C | 0.83951251  | -0.69537802 | -0.60349240 |
| H | 0.68402020  | -1.47307717 | -1.33749119 |
| C | 1.74292492  | 0.07760166  | -0.03153528 |
| H | 0.61686186  | 1.62871319  | -1.14844382 |
| C | 3.14502200  | 0.27072046  | 0.24072506  |
| C | -0.47758244 | 0.26116257  | 2.46024865  |
| C | -1.78282170 | -1.46336468 | 1.38516136  |
| H | 0.15198492  | 1.14528627  | 2.39756801  |
| C | -0.80437730 | -0.27246599 | 3.70640438  |
| H | -2.18625752 | -1.90315296 | 0.47686505  |
| C | -2.07149145 | -2.01939287 | 2.62765859  |
| H | -2.69080050 | -2.91132615 | 2.68773904  |
| C | -1.59130470 | -1.42252779 | 3.79865710  |
| H | -0.43137386 | 0.20486700  | 4.60988900  |
| H | -1.83687590 | -1.84337033 | 4.77007765  |
| C | 3.60290080  | 1.53355193  | 0.65550203  |
| C | 4.05963289  | -0.79325260 | 0.12392276  |
| H | 3.70223030  | -1.77098378 | -0.18689516 |
| C | 5.40537135  | -0.59053326 | 0.40958022  |
| H | 2.88930246  | 2.34531620  | 0.76512628  |
| C | 4.95392305  | 1.73399952  | 0.92736651  |
| H | 6.10733991  | -1.41491021 | 0.32127785  |
| C | 5.85580589  | 0.67357224  | 0.80693425  |
| H | 5.30303558  | 2.71319361  | 1.24233507  |
| H | 6.90822177  | 0.82875908  | 1.02765405  |

ts3b\_14eze

E [Hartrees] = -616.7741316635

Gcorr [kcal/mol] = 115.629

|   |             |            |             |
|---|-------------|------------|-------------|
| C | -1.12097021 | 1.35270889 | -0.03253522 |
| C | 0.20433164  | 1.29709945 | -0.01086602 |
| C | -0.61847339 | 3.61170302 | -0.14932787 |
| C | -1.61156122 | 2.73286606 | -0.11204645 |
| C | 1.41094163  | 0.57699207 | 0.04677068  |
| C | -0.13712420 | 4.93112941 | -0.22147144 |
| H | -1.77406694 | 0.47513220 | 0.00203772  |
| H | -2.67217055 | 3.00189438 | -0.13649989 |
| C | 2.02473232  | 0.27986086 | 1.29346349  |
| C | 2.08427951  | 0.18604228 | -1.14190836 |
| C | 0.14732586  | 5.67007917 | 0.95843817  |

|   |             |             |             |
|---|-------------|-------------|-------------|
| C | 0.14242002  | 5.53746045  | -1.47584474 |
| H | -0.05176089 | 5.21209884  | 1.92265475  |
| C | 0.66421478  | 6.95668249  | 0.87936966  |
| H | 1.62987570  | 0.41830293  | -2.10038484 |
| C | 3.29790643  | -0.48606446 | -1.07858544 |
| H | 1.52438426  | 0.58404691  | 2.20792192  |
| C | 3.23865922  | -0.39319004 | 1.34117602  |
| H | -0.06041573 | 4.97737394  | -2.38372575 |
| C | 0.65931679  | 6.82491389  | -1.53931693 |
| C | 0.92354450  | 7.54209545  | -0.36599912 |
| H | 0.85864894  | 7.27688031  | -2.50752383 |
| H | 0.86717861  | 7.51120199  | 1.79191985  |
| C | 3.88265571  | -0.77983917 | 0.15944447  |
| H | 3.68943056  | -0.62070923 | 2.30371769  |
| H | 4.83358935  | -1.30344069 | 0.20286579  |
| H | 3.79486782  | -0.78571222 | -1.99763235 |
| H | 1.33064852  | 8.54781476  | -0.42166265 |

ts4bhh\_12

E [Hartrees] = -925.2209978616

Gcorr [kcal/mol] = 178.040

|   |             |             |             |
|---|-------------|-------------|-------------|
| C | 1.14923773  | -0.16724340 | -0.10541190 |
| C | -0.64769181 | 0.63993336  | -0.45350039 |
| C | -1.49307601 | -0.41168696 | 0.38197304  |
| C | -1.99638343 | -0.89721346 | -0.80743025 |
| C | -1.25007191 | 0.12675725  | -1.59227901 |
| C | 1.99593246  | 0.55237124  | 0.45821164  |
| C | 2.69557126  | 1.60072729  | 1.08037037  |
| H | 0.93996918  | -1.19205175 | -0.36137007 |
| H | -0.41810989 | 1.67422369  | -0.22160750 |
| C | -1.49548616 | -0.67686085 | 1.79055669  |
| C | -2.91596538 | -1.93859375 | -1.24317109 |
| H | -1.25275520 | 0.41441239  | -2.63677552 |
| C | 2.56616474  | 1.80348669  | 2.47847177  |
| C | 3.53678895  | 2.47091598  | 0.34346347  |
| C | -0.91409184 | 0.27465175  | 2.66323977  |
| C | -2.02427512 | -1.85978528 | 2.36213539  |
| C | -3.98478654 | -2.38369470 | -0.44099734 |
| C | -2.77375307 | -2.48729958 | -2.53240270 |
| H | -0.48240667 | 1.17867795  | 2.24600238  |
| C | -0.89023558 | 0.06669032  | 4.03848758  |
| H | -2.43390981 | -2.62784045 | 1.71547072  |
| C | -1.98734351 | -2.06339822 | 3.73576068  |
| H | -1.96220786 | -2.14099980 | -3.16701073 |

|   |             |             |             |
|---|-------------|-------------|-------------|
| C | -3.64406796 | -3.47488361 | -2.98783742 |
| H | -4.14230997 | -1.93116144 | 0.53263805  |
| C | -4.85707806 | -3.36614790 | -0.90145012 |
| H | 1.93529378  | 1.12811659  | 3.04840533  |
| C | 3.23752417  | 2.84914182  | 3.10108223  |
| H | 3.64177382  | 2.32013886  | -0.72660324 |
| C | 4.21198685  | 3.50314015  | 0.98315032  |
| H | -3.51039110 | -3.89512719 | -3.98121479 |
| H | -2.39190176 | -2.98333440 | 4.15030953  |
| H | 3.12416205  | 2.99782217  | 4.17175391  |
| C | -1.42833637 | -1.10119551 | 4.58604961  |
| H | -0.44739735 | 0.81884568  | 4.68684105  |
| C | 4.06459586  | 3.70141686  | 2.36110652  |
| H | 4.85422883  | 4.16325463  | 0.40611556  |
| C | -4.68751036 | -3.92173229 | -2.17331898 |
| H | -5.67942566 | -3.69303444 | -0.27041270 |
| H | -5.36952438 | -4.68875011 | -2.52990217 |
| H | 4.59395011  | 4.51167486  | 2.85456910  |
| H | -1.40780270 | -1.26477736 | 5.65983397  |

ts4bhph\_12

E [Hartrees] = -925.2207396580

Gcorr [kcal/mol] = 179.324

|   |             |             |             |
|---|-------------|-------------|-------------|
| C | 1.18279870  | -0.25580438 | -0.47381472 |
| C | -0.50268294 | 0.80736365  | -0.45053809 |
| C | -1.19724893 | -0.03402508 | 0.73891364  |
| C | -2.00883879 | -0.60444534 | -0.20318827 |
| C | -1.43798712 | 0.18713482  | -1.29230852 |
| C | 2.28325480  | 0.26637666  | -0.73731008 |
| C | 3.35696287  | 1.09436881  | -1.10729465 |
| H | 0.74932295  | -1.17369159 | -0.09980147 |
| C | -0.10164505 | 2.22466383  | -0.48850374 |
| C | -0.97316267 | -0.12833923 | 2.15196512  |
| H | -2.76672341 | -1.38064166 | -0.16180717 |
| H | -1.69546709 | 0.33773767  | -2.33381848 |
| C | -0.33586520 | 3.07969056  | 0.59957178  |
| C | 0.53019401  | 2.74196480  | -1.63181883 |
| C | 3.96776400  | 1.94879790  | -0.15645983 |
| C | 3.84493915  | 1.10343893  | -2.43760412 |
| C | 0.16004080  | 0.47411738  | 2.74539395  |
| C | -1.87468197 | -0.83028548 | 2.98711793  |
| H | -2.75837554 | -1.28573879 | 2.54782841  |
| C | -1.64515074 | -0.92936940 | 4.35272212  |
| H | 0.86808162  | 0.99918679  | 2.11297410  |



|   |             |             |             |
|---|-------------|-------------|-------------|
| C | 0.37887204  | 0.37382112  | 4.11617397  |
| H | 0.73544535  | 2.07986684  | -2.46781212 |
| C | 0.92136121  | 4.07682013  | -1.68422302 |
| H | -0.82969407 | 2.69722189  | 1.48665553  |
| C | 0.05316559  | 4.41920768  | 0.54145673  |
| H | 3.38362759  | 0.44931098  | -3.17137374 |
| C | 4.89394141  | 1.94091269  | -2.79617181 |
| H | 3.59597688  | 1.95062296  | 0.86337554  |
| C | 5.00701327  | 2.78994621  | -0.53279878 |
| H | 5.45609620  | 3.44992828  | 0.20468606  |
| C | 5.47850607  | 2.79094446  | -1.85050863 |
| H | 5.25718824  | 1.93719106  | -3.82058134 |
| C | -0.51848868 | -0.32607914 | 4.92718129  |
| H | 1.25723758  | 0.84048659  | 4.55438127  |
| H | -2.34890765 | -1.47150035 | 4.97900500  |
| C | 0.68647585  | 4.92214156  | -0.59585537 |
| H | 1.42417511  | 4.45500255  | -2.57035755 |
| H | -0.13808924 | 5.06912933  | 1.39164715  |
| H | -0.34526625 | -0.40144182 | 5.99705339  |
| H | 0.99773112  | 5.96259189  | -0.63440189 |
| H | 6.29510663  | 3.44740068  | -2.13758723 |

ts4bphh\_12

E [Hartrees] = -925.2082875426

Gcorr [kcal/mol] = 179.610

|   |             |             |             |
|---|-------------|-------------|-------------|
| C | 1.20178144  | -0.37959244 | -0.20265153 |
| C | -0.27249262 | 0.76365502  | -0.43187604 |
| C | -1.36138692 | 0.07516052  | 0.43673714  |
| C | -1.99082933 | -0.39927487 | -0.66305070 |
| C | -1.04978120 | 0.39483654  | -1.55972247 |
| C | 2.11678480  | 0.05006582  | 0.56600383  |
| H | 2.48948126  | 0.92084924  | 1.07802118  |
| C | 0.92732897  | -1.67073688 | -0.86234032 |
| H | 0.15210808  | 1.75126937  | -0.27362865 |
| H | -1.43596814 | -0.11922648 | 1.50086502  |
| C | -3.03313761 | -1.39183793 | -0.89396554 |
| C | -1.02070904 | 0.78182762  | -2.93056168 |
| C | 0.09704521  | 1.48765108  | -3.44666321 |
| C | -2.09471002 | 0.49821363  | -3.80874702 |
| C | -4.10960357 | -1.52494396 | 0.00075976  |
| C | -2.94189259 | -2.27582443 | -1.98475427 |
| C | 1.03445103  | -1.79207033 | -2.25545155 |
| C | 0.49899289  | -2.77531632 | -0.11287613 |
| H | 0.41234392  | -2.67868490 | 0.96464335  |

|   |             |             |             |
|---|-------------|-------------|-------------|
| C | 0.17273595  | -3.97456427 | -0.74625049 |
| H | 1.36217317  | -0.94146433 | -2.84262562 |
| C | 0.72472883  | -2.99845313 | -2.88540662 |
| H | -2.09299925 | -2.20253959 | -2.65694944 |
| C | -3.90492532 | -3.26607458 | -2.17082995 |
| H | -4.18962270 | -0.83639247 | 0.83789171  |
| C | -5.06968184 | -2.51530002 | -0.19025774 |
| H | -2.96492872 | -0.02774153 | -3.43167569 |
| C | -2.04807356 | 0.90595131  | -5.13795455 |
| H | 0.93689172  | 1.69531301  | -2.78853680 |
| C | 0.13642079  | 1.88153034  | -4.77577510 |
| C | -0.93586479 | 1.59366410  | -5.63218272 |
| H | 1.00570573  | 2.41286934  | -5.15442918 |
| H | -2.88499065 | 0.68453759  | -5.79516869 |
| C | -4.97241912 | -3.38823726 | -1.27832111 |
| H | -5.89919487 | -2.60412709 | 0.50641114  |
| H | -3.81620469 | -3.94934975 | -3.01140472 |
| C | 0.28461895  | -4.08975974 | -2.13366996 |
| H | 0.82448933  | -3.08137026 | -3.96447537 |
| H | -0.17741471 | -4.81683920 | -0.15576217 |
| H | 0.02878285  | -5.02442157 | -2.62565585 |
| H | -5.72423267 | -4.15849746 | -1.42792134 |
| H | -0.90088005 | 1.90191631  | -6.67327124 |

ts4bphph\_12

E [Hartrees] = -925.1992417387

Gcorr [kcal/mol] = 178.608

|   |             |             |             |
|---|-------------|-------------|-------------|
| C | 1.22540905  | -0.49193544 | -0.14921393 |
| C | -0.12053180 | 0.83145996  | -0.45535794 |
| C | -1.25000547 | 0.17573721  | 0.42314430  |
| C | -1.93036915 | -0.19700142 | -0.67381350 |
| C | -0.95859562 | 0.51299128  | -1.57154695 |
| C | 2.08703995  | -0.19775295 | 0.73473398  |
| H | 2.53402229  | 0.58763045  | 1.31728197  |
| C | 0.90739366  | -1.73800374 | -0.86729771 |
| C | 0.43645978  | 2.18873525  | -0.18812289 |
| H | -1.33304085 | 0.01050721  | 1.49114851  |
| H | -2.80771364 | -0.80879503 | -0.85283944 |
| C | -1.00453337 | 0.84131981  | -2.96199467 |
| C | 0.00284700  | 1.60972223  | -3.59642223 |
| C | -2.08525848 | 0.37973266  | -3.75127397 |
| C | 0.90119955  | -1.77915618 | -2.26838482 |
| C | 0.60714727  | -2.90627001 | -0.14970835 |
| H | 0.61860330  | -2.87075198 | 0.93521419  |

|   |             |             |             |
|---|-------------|-------------|-------------|
| C | 0.29519564  | -4.08668565 | -0.82151638 |
| H | 1.14845231  | -0.88720241 | -2.83212667 |
| C | 0.59616572  | -2.96486636 | -2.93903611 |
| H | -2.86392037 | -0.21724533 | -3.28591695 |
| C | -2.15791891 | 0.67749542  | -5.10743444 |
| H | 0.83759968  | 1.97751600  | -3.01121313 |
| C | -0.07541194 | 1.89807890  | -4.95167726 |
| C | -1.15399618 | 1.43544261  | -5.71720478 |
| H | 0.70730484  | 2.48915491  | -5.41986350 |
| H | -2.99705948 | 0.31347591  | -5.69435727 |
| C | 0.28648470  | -4.11927144 | -2.21903974 |
| H | 0.60390280  | -2.98289797 | -4.02558979 |
| H | 0.05393627  | -4.98157306 | -0.25360147 |
| H | 0.04239312  | -5.04036301 | -2.74181730 |
| H | -1.20837700 | 1.66317445  | -6.77804750 |
| C | -0.34632398 | 3.11108074  | 0.52280220  |
| C | 1.70597914  | 2.58992588  | -0.62974508 |
| H | 2.33407386  | 1.87794045  | -1.15533795 |
| C | 2.16891642  | 3.88506976  | -0.38871985 |
| H | -1.33155192 | 2.81236025  | 0.87254909  |
| C | 0.11913545  | 4.40114350  | 0.77365822  |
| H | 3.15292216  | 4.17865483  | -0.74526610 |
| C | 1.37928503  | 4.79444951  | 0.31584988  |
| H | -0.50446227 | 5.10128862  | 1.32362010  |
| H | 1.74269464  | 5.80006080  | 0.50985275  |

ts4concpHH

E [Hartrees] = -925.2312247184

|   |             |             |             |
|---|-------------|-------------|-------------|
| C | -2.70353349 | 3.11469226  | -0.44772996 |
| C | -4.14141042 | 1.69576563  | 0.25596058  |
| C | -3.15241006 | 0.50925511  | 0.32891219  |
| C | -3.66648704 | -0.00740320 | -0.81429029 |
| C | -4.72029622 | 1.10180056  | -0.85534126 |
| C | -5.86800919 | 1.41485502  | -1.66304202 |
| C | -3.19041094 | -1.02814425 | -1.73619324 |
| C | -3.41361521 | -0.91591755 | -3.12138414 |
| H | -3.99605230 | -0.08275191 | -3.50138802 |
| C | -2.86288291 | -1.84288578 | -4.00624853 |
| H | -3.03967802 | -1.73654815 | -5.07342898 |
| C | -2.08299968 | -2.89737606 | -3.52749894 |
| H | -1.65667781 | -3.62020609 | -4.21780758 |
| C | -1.85474451 | -3.01856200 | -2.15253186 |
| H | -1.24864333 | -3.83645753 | -1.77182397 |
| C | -2.40291682 | -2.09657827 | -1.26677486 |

|   |             |             |             |
|---|-------------|-------------|-------------|
| H | -2.22711739 | -2.19304721 | -0.19888323 |
| H | -2.30746304 | 0.27977961  | 0.96444027  |
| H | -4.57927399 | 2.31281604  | 1.03450549  |
| C | -1.62101950 | 2.53460273  | -0.61109281 |
| C | -0.44403962 | 1.77271211  | -0.81084241 |
| H | -3.27287664 | 4.02095838  | -0.53370581 |
| C | 1.87180053  | 0.22249614  | -1.20683149 |
| C | 1.74793854  | 1.02220339  | -0.06682803 |
| C | 0.60733702  | 1.79441869  | 0.13306546  |
| C | -0.30402304 | 0.96558789  | -1.96428037 |
| C | 0.84035979  | 0.20063558  | -2.15227514 |
| H | 2.76330321  | -0.38019232 | -1.35659390 |
| H | 2.54645902  | 1.04552100  | 0.67023385  |
| H | 0.51050866  | 2.41649173  | 1.01794614  |
| H | -1.11541963 | 0.92550128  | -2.68289241 |
| H | 0.92092157  | -0.42810912 | -3.03478768 |
| C | -6.43410062 | 2.71000946  | -1.62157248 |
| C | -6.48005461 | 0.44748719  | -2.49058716 |
| H | -6.07663474 | -0.55957148 | -2.51851881 |
| C | -7.60704006 | 0.76673227  | -3.24359942 |
| H | -5.97002433 | 3.46885002  | -0.99677086 |
| C | -7.55698166 | 3.02196996  | -2.37797717 |
| H | -8.06642526 | 0.00545464  | -3.86890406 |
| C | -8.15031383 | 2.05313712  | -3.19628638 |
| H | -7.97188781 | 4.02588022  | -2.33670536 |
| H | -9.02666985 | 2.30018679  | -3.78900771 |

ts4concphhph

E [Hartrees] = -925.2242001120

Gcorr [kcal/mol] = 187.623

|   |             |             |             |
|---|-------------|-------------|-------------|
| C | -3.09086522 | 2.66294262  | 0.01483047  |
| C | -4.07973747 | 1.77550804  | 0.48477845  |
| C | -2.98329130 | 0.65125098  | 0.41758436  |
| C | -4.50295298 | 0.01407626  | -1.61804153 |
| C | -5.09183435 | 1.03789315  | -1.24609023 |
| H | -5.92227769 | 1.71155160  | -1.33988574 |
| C | -3.84878688 | -1.15895128 | -2.06683400 |
| C | -2.83108314 | -1.08829996 | -3.04502635 |
| H | -2.54906693 | -0.11728029 | -3.44044594 |
| C | -2.19819364 | -2.24489479 | -3.48702687 |
| H | -1.41836782 | -2.17385453 | -4.24089594 |
| C | -2.55535645 | -3.49328750 | -2.96664823 |
| H | -2.05543782 | -4.39342935 | -3.31312935 |
| C | -3.56107872 | -3.57499052 | -1.99884368 |

|   |             |             |             |
|---|-------------|-------------|-------------|
| H | -3.84651527 | -4.54164298 | -1.59195515 |
| C | -4.20713122 | -2.42603509 | -1.55338180 |
| H | -4.99272127 | -2.48890385 | -0.80614207 |
| H | -2.96485045 | -0.39365628 | 0.69618592  |
| C | -5.21018795 | 1.88001897  | 1.41081829  |
| C | -2.10438327 | 1.54338382  | -0.08140984 |
| H | -1.08916691 | 1.47077279  | -0.45588039 |
| C | -2.95085709 | 4.06753762  | -0.27991793 |
| C | -3.86069562 | 5.04941055  | 0.17270871  |
| C | -1.83407200 | 4.50051225  | -1.03127746 |
| C | -6.26637741 | 2.79444374  | 1.22971135  |
| C | -5.27819593 | 0.99959426  | 2.50626925  |
| H | -4.69906847 | 4.75508259  | 0.79143847  |
| C | -3.66823782 | 6.39279486  | -0.12951435 |
| H | -1.11667480 | 3.76582487  | -1.38538792 |
| C | -1.64912788 | 5.84549762  | -1.33497906 |
| H | -6.26686452 | 3.44563570  | 0.36079887  |
| C | -7.32339356 | 2.85442879  | 2.13425139  |
| H | -4.48747027 | 0.26867126  | 2.64938637  |
| C | -6.33346989 | 1.06620466  | 3.41436392  |
| C | -7.36020527 | 1.99578363  | 3.23652858  |
| H | -8.12722417 | 3.56809938  | 1.97279137  |
| H | -6.35644213 | 0.38475325  | 4.26091024  |
| C | -2.56707495 | 6.80054849  | -0.88990685 |
| H | -4.37833106 | 7.13024954  | 0.23591085  |
| H | -0.78634599 | 6.15104153  | -1.92122081 |
| H | -8.18633687 | 2.04278047  | 3.94049607  |
| H | -2.42356404 | 7.85109978  | -1.12695291 |

ts4concp hphh

E [Hartrees] = -925.2361822023

|   |             |             |             |
|---|-------------|-------------|-------------|
| C | -3.06335245 | 2.37532355  | 0.13532074  |
| C | -4.08981127 | 1.59696199  | 0.61937705  |
| C | -3.08150213 | 0.38567482  | 0.62769936  |
| C | -4.64597094 | -0.14932207 | -1.50233429 |
| C | -5.26182068 | 0.80029464  | -0.99778796 |
| H | -6.14859647 | 1.40477975  | -0.98611131 |
| C | -3.84541811 | -1.15758228 | -2.08811735 |
| C | -3.05594866 | -0.85388958 | -3.22259087 |
| H | -3.08191943 | 0.15303062  | -3.62677386 |
| C | -2.24017363 | -1.82352613 | -3.79376164 |
| H | -1.63484002 | -1.57026668 | -4.66000271 |
| C | -2.18269721 | -3.11145974 | -3.24999168 |
| H | -1.53825140 | -3.86455027 | -3.69504596 |

|   |             |             |             |
|---|-------------|-------------|-------------|
| C | -2.96150266 | -3.42337654 | -2.13150036 |
| H | -2.92083174 | -4.41995763 | -1.70003863 |
| C | -3.79443122 | -2.46765174 | -1.55733823 |
| H | -4.39174895 | -2.71227850 | -0.68613426 |
| C | -3.17859865 | -0.90611541 | 1.24151795  |
| C | -4.42508016 | -1.32834200 | 1.76012437  |
| H | -5.28155429 | -0.66772741 | 1.67066459  |
| C | -4.57133298 | -2.58281231 | 2.34232372  |
| H | -5.54142930 | -2.88753524 | 2.72648813  |
| C | -3.47827003 | -3.45101164 | 2.43233204  |
| H | -3.59358914 | -4.43225810 | 2.88426873  |
| C | -2.23427974 | -3.04199281 | 1.94076585  |
| H | -1.37579753 | -3.70430618 | 2.01666959  |
| C | -2.08112665 | -1.79002352 | 1.35573793  |
| H | -1.10698865 | -1.47977391 | 0.99633450  |
| H | -4.93072027 | 1.83433491  | 1.26314082  |
| C | -2.14859448 | 1.20832492  | 0.02144395  |
| C | -0.84401959 | 1.05691871  | -0.60099081 |
| H | -2.97212821 | 3.42020380  | -0.13957880 |
| C | 1.66509652  | 0.83340996  | -1.86254678 |
| C | 1.25981362  | 2.05451711  | -1.31677036 |
| C | 0.01575590  | 2.16824301  | -0.70088875 |
| C | -0.43008170 | -0.16387540 | -1.17069549 |
| C | 0.81085635  | -0.27081051 | -1.79224135 |
| H | 2.63353519  | 0.74642491  | -2.34774743 |
| H | 1.91393636  | 2.92069530  | -1.37414136 |
| H | -0.29600600 | 3.11997665  | -0.27844798 |
| H | -1.10326016 | -1.01328111 | -1.16284071 |
| H | 1.10330786  | -1.21795632 | -2.23790103 |

ts4concphph

E [Hartrees] = -925.2308438252

Gcorr [kcal/mol] = 182.687

|   |             |             |             |
|---|-------------|-------------|-------------|
| C | -3.25680655 | 2.33658279  | 0.08704407  |
| C | -4.28552868 | 1.57156045  | 0.63674501  |
| C | -3.21600174 | 0.37984727  | 0.70747596  |
| C | -4.66923144 | -0.25668596 | -1.45946071 |
| C | -5.33773463 | 0.67156716  | -0.98066761 |
| H | -6.25785201 | 1.22623657  | -0.98218723 |
| C | -3.82572975 | -1.23986574 | -2.02372486 |
| C | -2.93185477 | -0.88814804 | -3.06364026 |
| H | -2.91371767 | 0.13899269  | -3.41510423 |
| C | -2.08901925 | -1.84244337 | -3.61987207 |
| H | -1.41019521 | -1.55785815 | -4.41970517 |

|   |             |             |             |
|---|-------------|-------------|-------------|
| C | -2.10751747 | -3.16243572 | -3.15369042 |
| H | -1.44405633 | -3.90428701 | -3.58969213 |
| C | -2.98410933 | -3.51981149 | -2.12667590 |
| H | -3.00100930 | -4.54068688 | -1.75469315 |
| C | -3.84294863 | -2.57759307 | -1.56833940 |
| H | -4.51902952 | -2.85670508 | -0.76850673 |
| C | -3.21467173 | -0.95969816 | 1.22233763  |
| C | -4.40053300 | -1.57168851 | 1.68724823  |
| H | -5.33223043 | -1.01890875 | 1.64410868  |
| C | -4.38706219 | -2.88141923 | 2.15935442  |
| H | -5.31009315 | -3.33128753 | 2.51598746  |
| C | -3.20079237 | -3.62097659 | 2.16394051  |
| H | -3.19390833 | -4.64385020 | 2.53007369  |
| C | -2.02346112 | -3.03594730 | 1.68440299  |
| H | -1.09834007 | -3.60624070 | 1.67344926  |
| C | -2.02689354 | -1.72524921 | 1.22247846  |
| H | -1.10797534 | -1.27676128 | 0.85545861  |
| C | -5.36106567 | 2.00449008  | 1.53259280  |
| C | -2.31314820 | 1.22733677  | 0.11361162  |
| H | -1.30206509 | 1.09504309  | -0.25664412 |
| H | -3.19163355 | 3.37784251  | -0.20684674 |
| C | -6.23346348 | 3.03456814  | 1.12960352  |
| C | -5.53703143 | 1.43934485  | 2.80820361  |
| H | -4.86072266 | 0.66174179  | 3.14640239  |
| C | -6.55273961 | 1.89323322  | 3.65052121  |
| H | -6.10853032 | 3.47738743  | 0.14394097  |
| C | -7.24440977 | 3.48445077  | 1.97369027  |
| C | -7.41255502 | 2.91272537  | 3.23912165  |
| H | -7.90773184 | 4.27969680  | 1.64304519  |
| H | -6.66856941 | 1.44779928  | 4.63532091  |
| H | -8.20584359 | 3.25982233  | 3.89537716  |

ts5bcrbhhh\_12

E [Hartrees] = -925.2191992727

Gcorr [kcal/mol] = 183.536

|   |             |             |             |
|---|-------------|-------------|-------------|
| C | 0.82623845  | -0.06641236 | 0.13019851  |
| C | -0.49205396 | 0.72034217  | 0.22176679  |
| C | -1.63561516 | -0.27598566 | 0.56401296  |
| C | -1.65282390 | -0.71257036 | -0.74615574 |
| C | -0.57230115 | 0.21005692  | -1.14117616 |
| C | 2.01518507  | 0.62022981  | 0.16836529  |
| C | 2.39470731  | 1.71756585  | -0.65094085 |
| H | 0.73093795  | -1.08843467 | 0.50006387  |
| H | -0.45717134 | 1.76558395  | 0.51966758  |

|   |             |             |             |
|---|-------------|-------------|-------------|
| C | -2.17773518 | -0.63611447 | 1.85288345  |
| C | -2.34874349 | -1.72471389 | -1.53597402 |
| H | -0.27109135 | 0.65381502  | -2.07822929 |
| C | -1.94002118 | 0.20656182  | 2.96010395  |
| C | -2.92319107 | -1.81729753 | 2.06678898  |
| C | -3.69025413 | -2.06761385 | -1.28843466 |
| C | -1.68394885 | -2.34160549 | -2.61115318 |
| C | 2.93683122  | 2.88651342  | -0.05114459 |
| C | 2.33609606  | 1.66672940  | -2.07140572 |
| H | -1.36088876 | 1.11499337  | 2.81922966  |
| C | -2.43673010 | -0.10863210 | 4.22151276  |
| H | -3.08890442 | -2.50108030 | 1.24165308  |
| C | -3.41583708 | -2.12725918 | 3.32940271  |
| H | -4.22839861 | -1.56523024 | -0.49038711 |
| C | -4.33518053 | -3.01992369 | -2.07451006 |
| H | -0.65036968 | -2.07413475 | -2.81512285 |
| C | -2.32956171 | -3.29717733 | -3.39272084 |
| H | 1.97301754  | 0.76061928  | -2.54654514 |
| C | 2.78926488  | 2.73245623  | -2.83972642 |
| H | 3.02818744  | 2.91813990  | 1.03043152  |
| C | 3.30936956  | 3.97542328  | -0.82787513 |
| H | -5.37301051 | -3.27085101 | -1.87181960 |
| C | -3.65680497 | -3.64272951 | -3.12580057 |
| H | -1.79717892 | -3.77296893 | -4.21211288 |
| C | 3.25299079  | 3.90115932  | -2.22572081 |
| H | 2.76203096  | 2.66387195  | -3.92437881 |
| H | 3.68230929  | 4.87651542  | -0.34793357 |
| H | -2.24173217 | 0.55764632  | 5.05777004  |
| C | -3.18179650 | -1.27450706 | 4.41384896  |
| H | -3.98047120 | -3.04504822 | 3.47246015  |
| H | -4.16142825 | -4.38567629 | -3.73735213 |
| H | 3.58640431  | 4.73985695  | -2.83040031 |
| H | -3.57218069 | -1.51976056 | 5.39761373  |

ts5bcrbhhph\_12

E [Hartrees] = -925.2113993088

Gcorr [kcal/mol] = 184.537

|   |             |             |             |
|---|-------------|-------------|-------------|
| C | 0.79376795  | -0.12318265 | -0.28558862 |
| C | -0.58003637 | 0.84710263  | 0.48275223  |
| C | -1.64878938 | -0.19820175 | 0.72920912  |
| C | -1.62411527 | -0.61496500 | -0.56353968 |
| C | -0.52934800 | 0.39147822  | -0.91661403 |
| C | 1.95380993  | 0.29976310  | -0.90419068 |
| C | 2.52587311  | 1.59017395  | -1.04766648 |



|   |             |             |             |
|---|-------------|-------------|-------------|
| H | 0.70409918  | -1.15044985 | 0.06929078  |
| C | -0.32866352 | 2.16209201  | 1.08139692  |
| C | -2.33852635 | -0.67310135 | 1.92900162  |
| H | -2.05009203 | -1.44959625 | -1.10809529 |
| H | -0.48432242 | 1.00376455  | -1.81404683 |
| C | 2.73941162  | 2.46473761  | 0.05280837  |
| C | 3.02614086  | 1.98549011  | -2.31844831 |
| C | 0.03293109  | 2.27488247  | 2.43703979  |
| C | -0.42205907 | 3.33603623  | 0.31495539  |
| C | -2.63059743 | 0.19359971  | 2.99613802  |
| C | -2.75148627 | -2.01528364 | 2.01957974  |
| H | -2.51705743 | -2.69638211 | 1.20594852  |
| C | -3.43022473 | -2.47690616 | 3.14412584  |
| H | -2.34048554 | 1.23673181  | 2.93147224  |
| C | -3.30913810 | -0.27141138 | 4.12219728  |
| H | -0.70262596 | 3.26456449  | -0.73175551 |
| C | -0.13472060 | 4.57866595  | 0.87416256  |
| H | 0.11904377  | 1.37264250  | 3.03600766  |
| C | 0.31118178  | 3.51924469  | 2.99911901  |
| H | 2.37437793  | 2.17986982  | 1.03229753  |
| C | 3.41524556  | 3.66484407  | -0.11849380 |
| H | 2.91478297  | 1.30025770  | -3.15348439 |
| C | 3.61576317  | 3.23057675  | -2.49408103 |
| H | -3.73484056 | -3.51865903 | 3.20081356  |
| C | -3.70943625 | -1.60656586 | 4.20206474  |
| H | -3.52977093 | 0.41295377  | 4.93723975  |
| H | 0.59891809  | 3.58610021  | 4.04519139  |
| C | 0.23735672  | 4.67629159  | 2.21752093  |
| H | -0.19989585 | 5.47356452  | 0.26092189  |
| H | 3.95039643  | 3.53544094  | -3.48220920 |
| C | 3.82986572  | 4.06922706  | -1.39322785 |
| H | 3.57996911  | 4.31152682  | 0.73911853  |
| H | 4.32785121  | 5.02580695  | -1.52616001 |
| H | -4.23482499 | -1.96811554 | 5.08192475  |
| H | 0.46358857  | 5.64557214  | 2.65354939  |

ts5bcrbhphh\_12

E [Hartrees] = -925.2166931493

Gcorr [kcal/mol] = 183.627

|   |             |             |             |
|---|-------------|-------------|-------------|
| H | -0.20080992 | -3.17605809 | -1.51682595 |
| C | -2.40108962 | -1.14496065 | -0.64593325 |
| C | -1.07412390 | -1.05562002 | -0.99028065 |
| H | -0.35477564 | -0.24318010 | -0.99089148 |
| C | -0.94060708 | -2.48715979 | -1.13458536 |

|   |             |             |             |
|---|-------------|-------------|-------------|
| C | -3.43215142 | -0.24703343 | -0.19324701 |
| C | -1.72498338 | -3.24298552 | 0.49786351  |
| H | -1.60373635 | -2.44736664 | 1.24887951  |
| C | -1.33955398 | -4.55733293 | 0.68566462  |
| C | -1.21399273 | -5.09124649 | 2.01927240  |
| C | -2.02425364 | -4.68067683 | 3.11028630  |
| H | -2.76090603 | -3.89763828 | 2.94989637  |
| C | -1.90482943 | -5.27970883 | 4.35957341  |
| H | -2.54759171 | -4.96544675 | 5.17825628  |
| C | -0.94200781 | -6.27354994 | 4.57017555  |
| H | -0.84054787 | -6.73161074 | 5.55072802  |
| C | -0.11867289 | -6.68667141 | 3.51601628  |
| H | 0.62371892  | -7.46355422 | 3.67979726  |
| C | -0.27447576 | -6.12589123 | 2.25355389  |
| H | 0.32752986  | -6.46267520 | 1.41445289  |
| C | -2.35996522 | -2.71313747 | -0.77769800 |
| C | -3.36313360 | -3.47289507 | -1.59549416 |
| C | -4.20588700 | -2.77595467 | -2.47637014 |
| C | -3.46999457 | -4.86912397 | -1.52577810 |
| H | -2.79241977 | -5.40656569 | -0.86530576 |
| C | -4.40163470 | -5.54823239 | -2.31020159 |
| H | -4.14520059 | -1.69406699 | -2.54047631 |
| C | -5.13191781 | -3.45868274 | -3.26582494 |
| H | -5.77640241 | -2.90020409 | -3.93980853 |
| C | -5.23614725 | -4.84784944 | -3.18396958 |
| H | -4.47201858 | -6.63068397 | -2.23936512 |
| H | -5.96074857 | -5.37966733 | -3.79508291 |
| C | -3.22081660 | 1.14904453  | -0.16960234 |
| C | -4.68418301 | -0.74817830 | 0.22138008  |
| H | -4.86010640 | -1.81896286 | 0.19726566  |
| C | -5.68379558 | 0.11835078  | 0.65381603  |
| H | -2.26358983 | 1.54758010  | -0.49511787 |
| C | -4.22335900 | 2.00848646  | 0.26241658  |
| C | -5.45931411 | 1.49755156  | 0.67691273  |
| H | -4.04622818 | 3.08053135  | 0.27655132  |
| H | -6.64211977 | -0.28258003 | 0.97229206  |
| H | -6.24179366 | 2.17216979  | 1.01307956  |

ts5bcrbhphph\_12

E [Hartrees] = -925.2111552850

Gcorr [kcal/mol] = 183.328

|   |             |             |             |
|---|-------------|-------------|-------------|
| C | 0.14716252  | -2.97302561 | -1.64871789 |
| C | -2.51963029 | -1.11202175 | -0.49367817 |
| C | -1.19912186 | -0.89144181 | -0.63145205 |

|   |             |             |             |
|---|-------------|-------------|-------------|
| H | -0.55590727 | -0.02712943 | -0.50508567 |
| C | -0.91915992 | -2.33271796 | -0.90524265 |
| H | -3.38170853 | -0.50813177 | -0.23087081 |
| C | -1.73465021 | -3.20176280 | 0.59624091  |
| H | -1.75322321 | -2.47427800 | 1.42155135  |
| C | -1.34406612 | -4.53473494 | 0.70039082  |
| C | -1.12509057 | -5.07887446 | 2.02269903  |
| C | -0.62442950 | -4.33745026 | 3.12430690  |
| H | -0.37805507 | -3.28745371 | 2.99192090  |
| C | -0.39670477 | -4.94749527 | 4.35312388  |
| H | 0.01631776  | -4.36910287 | 5.17619264  |
| C | -0.71653942 | -6.29691957 | 4.54108379  |
| H | -0.55353941 | -6.76551544 | 5.50810234  |
| C | -1.22553315 | -7.04489016 | 3.47444383  |
| H | -1.46207186 | -8.09691740 | 3.61248734  |
| C | -1.38661779 | -6.45534233 | 2.22466568  |
| H | -1.73216658 | -7.03606759 | 1.37418321  |
| C | -2.35273639 | -2.64786202 | -0.68403301 |
| C | -3.24440137 | -3.43971642 | -1.58810607 |
| C | 1.31374402  | -2.23773621 | -1.93540953 |
| C | 0.03235889  | -4.29234502 | -2.13487438 |
| H | 1.41076853  | -1.22094720 | -1.56472768 |
| C | 2.33954916  | -2.80024269 | -2.68995622 |
| H | -0.85014862 | -4.86815226 | -1.88840972 |
| C | 1.06698661  | -4.84993191 | -2.87918591 |
| H | 3.23246050  | -2.22012985 | -2.90653490 |
| C | 2.21938813  | -4.10958914 | -3.16277832 |
| H | 0.97286119  | -5.86846333 | -3.24582312 |
| H | 3.01957239  | -4.55103119 | -3.75098603 |
| C | -3.40106310 | -3.01835480 | -2.91634237 |
| C | -3.95320094 | -4.56059768 | -1.14438363 |
| H | -3.81386826 | -4.90786629 | -0.12552762 |
| C | -4.80684180 | -5.24531949 | -2.01042829 |
| H | -2.84726815 | -2.15078926 | -3.26659713 |
| C | -4.24989822 | -3.70433670 | -3.78356372 |
| H | -4.35506501 | -3.37029342 | -4.81245740 |
| C | -4.95860291 | -4.82016115 | -3.33159597 |
| H | -5.34920398 | -6.11657546 | -1.65264408 |
| H | -5.61903197 | -5.35806221 | -4.00654526 |

ts5bhh\_12

E [Hartrees] = -925.2349003613

Gcorr [kcal/mol] = 182.230

|   |            |             |            |
|---|------------|-------------|------------|
| C | 0.93312396 | -0.52030517 | 1.51622417 |
|---|------------|-------------|------------|

|   |             |             |             |
|---|-------------|-------------|-------------|
| C | -0.38698490 | 0.03344628  | 0.96424778  |
| C | -1.56961338 | -0.98237683 | 1.19548681  |
| C | -1.72230524 | -1.10334092 | -0.20811378 |
| C | -0.67105968 | -0.21783923 | -0.47814263 |
| C | 2.14476862  | -0.13518206 | 1.29632586  |
| C | 3.44390333  | 0.25475452  | 1.09962495  |
| H | 0.73912113  | -1.48888978 | 2.00698947  |
| H | -0.60425113 | 1.03060915  | 1.36764789  |
| C | -2.18309148 | -1.44414962 | 2.39170856  |
| C | -2.63816569 | -1.81733687 | -1.10969640 |
| H | -0.21256702 | 0.15264038  | -1.38756153 |
| C | 4.11293061  | 1.12323820  | 2.02564712  |
| C | 4.17877918  | -0.18235786 | -0.05293575 |
| C | -1.88144535 | -0.80997141 | 3.62815730  |
| C | -3.08908049 | -2.53979475 | 2.41959342  |
| C | -4.00534206 | -1.94373856 | -0.81450592 |
| C | -2.15577051 | -2.34364098 | -2.31888645 |
| H | -1.17864755 | 0.01866950  | 3.63730913  |
| C | -2.46993090 | -1.23174583 | 4.81173270  |
| H | -3.31009921 | -3.06895727 | 1.49906049  |
| C | -3.66405517 | -2.95687078 | 3.61201015  |
| H | -1.09855004 | -2.24888184 | -2.55248936 |
| C | -3.01438971 | -2.99536806 | -3.20264696 |
| H | -4.39280553 | -1.51684486 | 0.10551539  |
| C | -4.86369746 | -2.59235215 | -1.70093083 |
| H | 3.57413602  | 1.46007392  | 2.90581517  |
| C | 5.41612935  | 1.52609968  | 1.79584623  |
| H | 3.69033088  | -0.84401063 | -0.76160414 |
| C | 5.48499253  | 0.22859003  | -0.25197964 |
| H | -2.62466025 | -3.40493311 | -4.13078069 |
| H | -4.34794330 | -3.80202259 | 3.60700532  |
| H | 5.90322110  | 2.18801355  | 2.50744178  |
| C | -3.36857550 | -2.30616247 | 4.81663702  |
| H | -2.22739931 | -0.72327351 | 5.74147673  |
| C | 6.11703802  | 1.08586498  | 0.66184911  |
| H | 6.02505986  | -0.11660362 | -1.13001019 |
| C | -4.37097032 | -3.12346813 | -2.89545444 |
| H | -5.92009887 | -2.67879446 | -1.46105726 |
| H | -5.04065018 | -3.63174357 | -3.58390467 |
| H | 7.14168090  | 1.40407002  | 0.49469557  |
| H | -3.82574948 | -2.63540459 | 5.74524544  |

ts5bhphh\_12

E [Hartrees] = -925.2322684600

Gcorr [kcal/mol] = 181.470

|   |             |             |             |
|---|-------------|-------------|-------------|
| C | 2.31570267  | 0.23250218  | 1.53370264  |
| C | 1.11463971  | 0.55510990  | 0.64107547  |
| C | -0.14924920 | -0.29686590 | 0.99910278  |
| C | -0.09702367 | -0.98173506 | -0.19015675 |
| C | 1.05467310  | -0.25241980 | -0.67979582 |
| C | 3.46931424  | 0.00908165  | 0.94620469  |
| C | 4.75365396  | -0.02188009 | 0.46881222  |
| H | 2.13181308  | 0.24442875  | 2.62226897  |
| C | 0.89077046  | 2.04957057  | 0.39027601  |
| C | -1.07123487 | -0.21212001 | 2.10999857  |
| H | -0.73987744 | -1.72634038 | -0.64868673 |
| H | 1.55528521  | -0.37457654 | -1.70009449 |
| C | -0.30456169 | 2.67537205  | 0.77093303  |
| C | 1.87897974  | 2.83247915  | -0.22301628 |
| C | 5.64186139  | 0.98841944  | 1.04430875  |
| C | 5.34314470  | -1.02310449 | -0.37354843 |
| C | -0.88227771 | 0.74712632  | 3.12859316  |
| C | -2.17192006 | -1.09421864 | 2.21016968  |
| H | -2.32756113 | -1.84125499 | 1.43644384  |
| C | -3.04288337 | -1.02321379 | 3.29160885  |
| H | -0.05093342 | 1.44297041  | 3.05684131  |
| C | -1.76456734 | 0.82100415  | 4.20320427  |
| H | 2.80485525  | 2.36395292  | -0.53391863 |
| C | 1.67799159  | 4.19445205  | -0.45189664 |
| H | -1.07363335 | 2.09934104  | 1.26770925  |
| C | -0.50699038 | 4.03399646  | 0.54389614  |
| H | 4.70403124  | -1.80977285 | -0.76584980 |
| C | 6.69036679  | -1.01220903 | -0.63350410 |
| H | 5.19788280  | 1.86455304  | 1.50126026  |
| C | 7.01783397  | 1.02288256  | 0.64947483  |
| H | 7.64416905  | 1.84402193  | 0.99047636  |
| C | 7.54022682  | 0.02601367  | -0.14042420 |
| H | 7.12657829  | -1.79879399 | -1.24093879 |
| C | -2.84392492 | -0.06429962 | 4.29284184  |
| H | -1.60518346 | 1.56670003  | 4.97749190  |
| H | -3.88097583 | -1.71389462 | 3.35832169  |
| C | 0.48411654  | 4.80128856  | -0.07231595 |
| H | 2.45421400  | 4.77453525  | -0.93608649 |
| H | -1.44136767 | 4.49588215  | 0.85106560  |
| H | -3.52724720 | -0.00911076 | 5.13610789  |
| H | 0.32243791  | 5.86120456  | -0.25730401 |
| H | 8.59232676  | 0.03001821  | -0.42109519 |

ts5bhphph\_12

E [Hartrees] = -925.2058347111

Gcorr [kcal/mol] = 181.161

|   |             |             |             |
|---|-------------|-------------|-------------|
| C | 0.76818627  | -0.17845756 | -0.72098159 |
| C | -0.53788889 | 0.61654512  | -0.72653006 |
| C | -1.27915058 | 0.17959670  | 0.63394488  |
| C | -2.38703990 | -0.26169072 | -0.13821896 |
| C | -1.80688481 | 0.05569115  | -1.34515820 |
| C | 1.63755044  | -0.01899980 | 0.25596945  |
| C | 2.64115767  | 0.11688263  | 1.29538004  |
| H | 1.06586954  | -0.73441812 | -1.62719723 |
| C | -0.38101981 | 2.13911842  | -0.70756321 |
| C | -0.69110872 | 0.10505785  | 2.02486508  |
| H | -3.33769613 | -0.71414552 | 0.13156006  |
| H | -2.12961826 | -0.02207499 | -2.37781992 |
| C | -1.46182936 | 2.94542544  | -0.31165792 |
| C | 0.80455916  | 2.77065781  | -1.10444704 |
| C | 3.75179807  | -0.75017031 | 1.32144302  |
| C | 2.51579253  | 1.07442786  | 2.31962564  |
| C | 0.12786386  | -1.08711896 | 2.32545855  |
| C | -0.94242062 | 1.05725289  | 3.04841176  |
| H | -1.56143377 | 1.91622875  | 2.80260853  |
| C | -0.43104680 | 0.89882803  | 4.31228581  |
| H | 0.30616391  | -1.86406431 | 1.63139462  |
| C | 0.60758915  | -1.20522343 | 3.69040473  |
| H | 1.64777475  | 2.16687331  | -1.42180776 |
| C | 0.92256326  | 4.16329953  | -1.07726922 |
| H | -2.39791540 | 2.47995542  | -0.02066401 |
| C | -1.34495297 | 4.33342765  | -0.27982120 |
| H | 1.66086833  | 1.74037057  | 2.31950838  |
| C | 3.46141846  | 1.15606024  | 3.33495667  |
| H | 3.86647715  | -1.48679333 | 0.53172252  |
| C | 4.69824587  | -0.66558546 | 2.34184816  |
| H | 5.54835398  | -1.34272008 | 2.34579250  |
| C | 4.55693588  | 0.28874973  | 3.35163464  |
| H | 3.33729976  | 1.89521667  | 4.12153264  |
| C | 0.36073194  | -0.24181432 | 4.62918935  |
| H | 1.21866753  | -2.07160511 | 3.93225546  |
| H | -0.62846522 | 1.63714614  | 5.08438536  |
| C | -0.14981328 | 4.95072728  | -0.66107355 |
| H | 1.85590895  | 4.62845871  | -1.38364148 |
| H | -2.19090001 | 4.93531255  | 0.04243542  |
| H | 0.77061464  | -0.33430473 | 5.63113155  |
| H | -0.05929983 | 6.03363559  | -0.63554463 |

H 5.29457267 0.35773919 4.14601320

ts6crbhhh\_124

E [Hartrees] = -925.2212408168

|   |             |             |             |
|---|-------------|-------------|-------------|
| H | -0.20635914 | -3.49360233 | -0.63561447 |
| C | -2.38270831 | -1.54024353 | -0.16765282 |
| C | -1.04124832 | -1.46064058 | 0.10769855  |
| C | -0.04608811 | -0.47772018 | 0.49718934  |
| C | 1.30404645  | -0.87022138 | 0.58119317  |
| H | 1.57649964  | -1.89450213 | 0.34223561  |
| C | 2.28736073  | 0.03161136  | 0.98017832  |
| H | 3.32289345  | -0.29251164 | 1.03821648  |
| C | 1.94379229  | 1.34435774  | 1.30950538  |
| H | 2.71034142  | 2.04913338  | 1.61948714  |
| C | 0.60474402  | 1.74286532  | 1.24890547  |
| H | 0.32635240  | 2.75710563  | 1.52267168  |
| C | -0.38066114 | 0.84511991  | 0.85019562  |
| H | -1.41920749 | 1.15709887  | 0.83573897  |
| C | -0.89384031 | -2.97813887 | 0.01934636  |
| C | -3.49364865 | -0.63876126 | -0.41844031 |
| C | -3.30965936 | 0.64947724  | -0.95863639 |
| H | -2.30745100 | 0.98207827  | -1.20970890 |
| C | -4.40074636 | 1.47922940  | -1.20066345 |
| H | -4.24081762 | 2.46828436  | -1.62162343 |
| C | -5.69769332 | 1.04102903  | -0.91630988 |
| H | -6.54731305 | 1.69114796  | -1.10570354 |
| C | -5.89618165 | -0.24210497 | -0.40026829 |
| H | -6.90187542 | -0.59355778 | -0.18584900 |
| C | -4.80741138 | -1.07745475 | -0.16315738 |
| H | -4.96384408 | -2.07686057 | 0.23447300  |
| C | -1.90675098 | -3.53202236 | 1.27207290  |
| H | -2.11196293 | -2.87259613 | 2.13012647  |
| C | -0.95227483 | -4.54151929 | 1.26119893  |
| C | -0.15317448 | -4.69251781 | 2.47361666  |
| C | 1.25121799  | -4.78981927 | 2.39491692  |
| H | 1.72394107  | -4.73665532 | 1.41744193  |
| C | 2.02404535  | -4.94187818 | 3.54228164  |
| H | 3.10718032  | -4.99051932 | 3.45958586  |
| C | 1.41322925  | -5.06094899 | 4.79519128  |
| H | 2.01664581  | -5.20557952 | 5.68727046  |
| C | 0.02099062  | -5.00591056 | 4.88778886  |
| H | -0.46389996 | -5.10476191 | 5.85614250  |
| C | -0.75341499 | -4.80203138 | 3.74615681  |
| H | -1.83657134 | -4.74834936 | 3.83039137  |

|   |             |             |             |
|---|-------------|-------------|-------------|
| C | -2.39336641 | -3.06958613 | -0.09240080 |
| H | -2.91220951 | -3.74383173 | -0.76753902 |

ts6crbhhph\_123

E [Hartrees] = -925.2119428788

|   |             |             |             |
|---|-------------|-------------|-------------|
| C | 0.07681628  | -3.73823904 | -0.94114848 |
| C | -2.32663148 | -1.60923732 | -0.07322621 |
| C | -0.99046217 | -1.54591489 | 0.13246690  |
| C | -0.02956540 | -0.51840726 | 0.51037398  |
| C | 1.12795589  | -0.87479309 | 1.22622488  |
| H | 1.30184708  | -1.91911034 | 1.47372011  |
| C | 2.03323072  | 0.10332052  | 1.63326591  |
| H | 2.91953003  | -0.18424114 | 2.19208512  |
| C | 1.80251759  | 1.44616555  | 1.32558965  |
| H | 2.51220598  | 2.20709990  | 1.63844079  |
| C | 0.65663180  | 1.80853656  | 0.61061018  |
| H | 0.47566070  | 2.85152418  | 0.36496279  |
| C | -0.25359219 | 0.83568755  | 0.20628173  |
| H | -1.13949041 | 1.11518157  | -0.35795640 |
| C | -0.85373233 | -3.07753427 | 0.01996002  |
| H | -3.11441942 | -0.86246950 | -0.08416857 |
| C | -1.86264255 | -3.54629291 | 1.39300831  |
| H | -1.99512583 | -2.81483893 | 2.20568706  |
| C | -1.01855936 | -4.64502159 | 1.45407832  |
| C | -0.17462304 | -4.75487221 | 2.63657183  |
| C | 1.20728901  | -4.99650190 | 2.48019315  |
| H | 1.60654227  | -5.09758180 | 1.47475057  |
| C | 2.04385611  | -5.09096725 | 3.58908440  |
| H | 3.10967917  | -5.25278996 | 3.44721975  |
| C | 1.51516219  | -5.01350310 | 4.88207255  |
| H | 2.16561301  | -5.11686917 | 5.74648308  |
| C | 0.14311625  | -4.81573036 | 5.05442617  |
| H | -0.27654637 | -4.76192684 | 6.05620386  |
| C | -0.69035650 | -4.66175601 | 3.94731670  |
| H | -1.75487859 | -4.49056155 | 4.09035233  |
| C | -2.36455796 | -3.12866725 | 0.01729415  |
| H | -2.93980057 | -3.81190931 | -0.60236338 |
| C | 1.12476802  | -2.98997466 | -1.49845272 |
| C | -0.12137833 | -5.05628014 | -1.39181776 |
| H | -0.89550648 | -5.64930943 | -0.91918132 |
| C | 0.69838606  | -5.59915514 | -2.37330549 |
| H | 1.29886790  | -1.97024315 | -1.17836610 |
| C | 1.95603941  | -3.54546290 | -2.47636167 |
| C | 1.74675940  | -4.84795043 | -2.91965454 |



|   |            |             |             |
|---|------------|-------------|-------------|
| H | 0.52833781 | -6.61931622 | -2.70725869 |
| H | 2.76601670 | -2.94911845 | -2.88805138 |
| H | 2.39401158 | -5.28127934 | -3.67749513 |

ts6crbhph\_124

E [Hartrees] = -925.2142671970

Gcorr [kcal/mol] = 182.580

|   |             |             |             |
|---|-------------|-------------|-------------|
| C | 0.60780449  | -2.93280182 | -1.62458923 |
| C | -1.89423593 | -1.47178314 | 0.22012109  |
| C | -0.64263820 | -1.08058275 | -0.12082712 |
| C | 0.09750274  | 0.16912235  | -0.11755663 |
| C | 1.49147802  | 0.16846946  | -0.30713961 |
| H | 2.00584476  | -0.77274170 | -0.47351286 |
| C | 2.20777806  | 1.36388941  | -0.28666131 |
| H | 3.28444119  | 1.34836062  | -0.43204079 |
| C | 1.54574288  | 2.57642568  | -0.08437085 |
| H | 2.10482637  | 3.50803158  | -0.07259830 |
| C | 0.15825387  | 2.58961209  | 0.09773739  |
| H | -0.36141991 | 3.53156135  | 0.25103206  |
| C | -0.56007742 | 1.39906619  | 0.07889891  |
| H | -1.63881584 | 1.41075517  | 0.21116415  |
| C | -0.18255355 | -2.53063707 | -0.42500479 |
| H | -2.75286805 | -0.98310823 | 0.66554389  |
| C | -0.28592007 | -3.33019654 | 0.86546747  |
| H | -0.11052603 | -2.78667717 | 1.80779791  |
| C | -0.91061030 | -4.56610488 | 0.77590375  |
| C | -1.38879721 | -5.15213573 | 2.02301171  |
| C | -0.55382121 | -5.24739680 | 3.15754345  |
| H | 0.45708098  | -4.84844926 | 3.11057464  |
| C | -0.99660387 | -5.87412278 | 4.32177867  |
| H | -0.32997322 | -5.95313499 | 5.17732405  |
| C | -2.29561800 | -6.38062155 | 4.39920417  |
| H | -2.64440845 | -6.85728069 | 5.31134767  |
| C | -3.13960431 | -6.28254409 | 3.28769589  |
| H | -4.15003084 | -6.68116913 | 3.33665267  |
| C | -2.68372863 | -5.70342244 | 2.10709577  |
| H | -3.32633668 | -5.66138560 | 1.23165284  |
| C | -1.62858323 | -2.91334903 | -0.14724143 |
| H | -2.22857398 | -3.52337612 | -0.80763933 |
| C | 0.63252156  | -2.09042290 | -2.74717615 |
| C | 1.33245182  | -4.13262663 | -1.66656954 |
| H | 0.08515855  | -1.15245417 | -2.72586270 |
| C | 1.36287545  | -2.43841474 | -3.88335819 |
| H | 1.29768850  | -4.80189028 | -0.81428752 |

|   |            |             |             |
|---|------------|-------------|-------------|
| C | 2.06286753 | -4.47811075 | -2.80288321 |
| H | 1.37094688 | -1.77168525 | -4.74174418 |
| C | 2.08263595 | -3.63378530 | -3.91544346 |
| H | 2.61787492 | -5.41249172 | -2.81819159 |
| H | 2.65384023 | -3.90547944 | -4.79913571 |

ts6crbhphph\_12

E [Hartrees] = -925.2040537681

Gcorr [kcal/mol] = 183.173

|   |             |             |             |
|---|-------------|-------------|-------------|
| C | -0.05520287 | -3.46251173 | -1.23043772 |
| C | -2.48852828 | -1.18704832 | -0.57896694 |
| C | -1.19211989 | -1.29541316 | -0.24719699 |
| H | -0.42103680 | -0.61640983 | 0.09749157  |
| C | -1.16635095 | -2.78289685 | -0.54332806 |
| H | -3.19831621 | -0.36639093 | -0.60167333 |
| C | -2.46625309 | -3.34919667 | 0.62839347  |
| H | -2.75799847 | -2.74631266 | 1.50266202  |
| C | -1.70306911 | -4.49491565 | 0.67077768  |
| C | -1.03036336 | -4.85790974 | 1.90374347  |
| C | -0.36094535 | -3.91804141 | 2.72093781  |
| H | -0.36328089 | -2.86969630 | 2.43089976  |
| C | 0.31558586  | -4.31957929 | 3.87016557  |
| H | 0.83909394  | -3.58245909 | 4.47462234  |
| C | 0.30923954  | -5.66270789 | 4.25696111  |
| H | 0.82934619  | -5.97427678 | 5.15886556  |
| C | -0.35476191 | -6.60609558 | 3.46575311  |
| H | -0.35369235 | -7.65404274 | 3.75521272  |
| C | -0.98610225 | -6.21562196 | 2.28843097  |
| H | -1.46522521 | -6.94968808 | 1.64673129  |
| C | -2.66812007 | -2.71080143 | -0.75301198 |
| C | -3.48753408 | -3.32920515 | -1.84139788 |
| C | 1.23488699  | -3.34926845 | -0.68460900 |
| C | -0.22805651 | -4.14163987 | -2.44753899 |
| H | 1.37166298  | -2.82924978 | 0.25984722  |
| C | 2.32651530  | -3.92865931 | -1.32777905 |
| H | -1.21816889 | -4.22793536 | -2.87831897 |
| C | 0.87012093  | -4.70232425 | -3.09349283 |
| H | 3.31638283  | -3.84868712 | -0.88650207 |
| C | 2.14904757  | -4.60499661 | -2.53645701 |
| H | 0.72674787  | -5.22037664 | -4.03811010 |
| H | 3.00070666  | -5.05085550 | -3.04295778 |
| C | -4.04596331 | -2.51308830 | -2.83500953 |
| C | -3.71048323 | -4.71455961 | -1.90191922 |
| H | -3.25242119 | -5.34817749 | -1.14942639 |

|   |             |             |             |
|---|-------------|-------------|-------------|
| C | -4.47467515 | -5.26098680 | -2.93107047 |
| H | -3.87832380 | -1.43991021 | -2.80750658 |
| C | -4.81145913 | -3.06315536 | -3.86495619 |
| H | -5.23572827 | -2.41304887 | -4.62566181 |
| C | -5.02998087 | -4.43969616 | -3.91634558 |
| H | -4.63499990 | -6.33553758 | -2.96469412 |
| H | -5.62460224 | -4.87021582 | -4.71766448 |

ts7hh\_124

E [Hartrees] = -925.3002838300

Gcorr [kcal/mol] = 185.211

|   |             |             |             |
|---|-------------|-------------|-------------|
| C | -2.79390889 | 2.29989504  | 0.21538514  |
| C | -4.22063626 | 1.99416495  | 0.03795807  |
| C | -3.17801302 | 0.19264571  | 0.22623086  |
| C | -3.91169711 | -0.04526402 | -1.01797971 |
| C | -4.74669602 | 1.06081205  | -0.97148959 |
| C | -5.96638646 | 1.35144546  | -1.74334898 |
| C | -3.52408983 | -0.96096618 | -2.08353499 |
| C | -3.79682677 | -0.69259939 | -3.44034600 |
| H | -4.31803702 | 0.22128227  | -3.70578896 |
| C | -3.38742611 | -1.57566870 | -4.43336665 |
| H | -3.60343091 | -1.34968741 | -5.47440697 |
| C | -2.68503388 | -2.74008617 | -4.10202651 |
| H | -2.36330261 | -3.42491923 | -4.88194968 |
| C | -2.40122435 | -3.01540367 | -2.76367455 |
| H | -1.85847313 | -3.91796832 | -2.49503023 |
| C | -2.82388546 | -2.13960638 | -1.76523579 |
| H | -2.62853092 | -2.36786659 | -0.72082462 |
| H | -3.71805253 | 0.12764423  | 1.17121190  |
| H | -4.94597188 | 2.63827877  | 0.54342392  |
| C | -2.05658362 | 1.14987034  | 0.13525381  |
| C | -0.66123513 | 0.89494845  | -0.18530354 |
| H | -2.42989497 | 3.31718638  | 0.36676666  |
| C | 2.03983585  | 0.38185539  | -0.79316160 |
| C | 1.50430614  | 1.65938229  | -0.98861627 |
| C | 0.16746917  | 1.91197990  | -0.69814276 |
| C | -0.10699788 | -0.38213486 | 0.01465581  |
| C | 1.22672455  | -0.63846514 | -0.29560498 |
| H | 3.08177125  | 0.18450126  | -1.03005941 |
| H | 2.12909475  | 2.45567480  | -1.38480446 |
| H | -0.25488664 | 2.89470242  | -0.88853953 |
| H | -0.73289464 | -1.16880502 | 0.42669462  |
| H | 1.63477739  | -1.63369654 | -0.13984958 |
| C | -6.35052876 | 2.67703521  | -2.00812090 |

|   |             |             |             |
|---|-------------|-------------|-------------|
| C | -6.79032565 | 0.30998867  | -2.20867800 |
| H | -6.50829260 | -0.71706690 | -1.99628478 |
| C | -7.95146693 | 0.58645642  | -2.92454530 |
| H | -5.71287797 | 3.49157289  | -1.67443860 |
| C | -7.52133428 | 2.95392893  | -2.71396309 |
| H | -8.57444511 | -0.23143975 | -3.27720042 |
| C | -8.32479454 | 1.91048030  | -3.17717301 |
| H | -7.80041656 | 3.98572738  | -2.91153543 |
| H | -9.23463846 | 2.12548188  | -3.73113829 |

ts7hph\_123

E [Hartrees] = -925.3014291499

E [Hartrees] = -925.3014291499

Gcorr [kcal/mol] = 184.655

|   |             |             |             |
|---|-------------|-------------|-------------|
| C | -2.84604922 | 1.99894996  | 0.46838028  |
| C | -4.22431729 | 1.50606447  | 0.40646475  |
| C | -2.87871467 | -0.17358918 | 0.27096852  |
| C | -3.75600773 | -0.34451048 | -0.92842367 |
| C | -4.69004279 | 0.61229261  | -0.65705086 |
| H | -5.65046255 | 0.75147151  | -1.15541612 |
| C | -3.52250834 | -1.20852786 | -2.06934758 |
| C | -4.20411831 | -1.02337934 | -3.29007555 |
| H | -4.88124335 | -0.18025410 | -3.39609202 |
| C | -3.99745404 | -1.89093414 | -4.35660834 |
| H | -4.53204262 | -1.73342139 | -5.28990481 |
| C | -3.09081019 | -2.95141663 | -4.24091283 |
| H | -2.92450644 | -3.62139658 | -5.08001129 |
| C | -2.40014394 | -3.14002646 | -3.04250545 |
| H | -1.69605189 | -3.96199139 | -2.94266155 |
| C | -2.61976103 | -2.28495521 | -1.96431056 |
| H | -2.10774628 | -2.45569549 | -1.02164575 |
| C | -3.02867934 | -0.95391396 | 1.47916745  |
| C | -3.93282722 | -2.04135637 | 1.52877166  |
| H | -4.54961725 | -2.25299498 | 0.66129829  |
| C | -4.02794008 | -2.82900168 | 2.66944237  |
| H | -4.73093321 | -3.65752997 | 2.69299958  |
| C | -3.21242356 | -2.57219780 | 3.77749173  |
| H | -3.27815814 | -3.20086531 | 4.66120910  |
| C | -2.29017632 | -1.52051522 | 3.72973340  |
| H | -1.63956275 | -1.32985443 | 4.57918809  |
| C | -2.18706724 | -0.72696927 | 2.59393410  |
| H | -1.45766953 | 0.07524357  | 2.54778518  |
| H | -4.97166406 | 1.98291926  | 1.04328796  |
| C | -1.96271324 | 1.00407836  | 0.16551579  |

|   |             |             |             |
|---|-------------|-------------|-------------|
| C | -0.58177675 | 1.00406686  | -0.27695644 |
| H | -2.60934190 | 3.03829021  | 0.70057908  |
| C | 2.12322613  | 0.97428023  | -1.06580258 |
| C | 1.40123589  | 2.17377086  | -1.06606783 |
| C | 0.06364672  | 2.18898362  | -0.68750102 |
| C | 0.15951259  | -0.19396482 | -0.27309979 |
| C | 1.49432603  | -0.20851332 | -0.67301315 |
| H | 3.16568059  | 0.96461410  | -1.37206798 |
| H | 1.88264760  | 3.09681684  | -1.37890818 |
| H | -0.50294289 | 3.11538078  | -0.72411932 |
| H | -0.31651588 | -1.10966743 | 0.06577749  |
| H | 2.04752314  | -1.14408560 | -0.66731563 |

ts7phh\_124

E [Hartrees] = -925.2968141438

Gcorr [kcal/mol] = 184.082

|   |             |             |             |
|---|-------------|-------------|-------------|
| H | 0.97958828  | -4.29738757 | -1.14295644 |
| C | 0.09536424  | -3.75900933 | -0.79907644 |
| C | -1.20138419 | -4.01565960 | -1.15565177 |
| C | -1.80357032 | -4.70904935 | -2.27625386 |
| C | -1.04346913 | -5.12570762 | -3.38901614 |
| H | 0.01316308  | -4.87620420 | -3.43197069 |
| C | -1.63882427 | -5.82592492 | -4.43211633 |
| H | -1.03741880 | -6.14070000 | -5.28115988 |
| C | -3.00992236 | -6.10797814 | -4.40429373 |
| H | -3.47324299 | -6.64660857 | -5.22634477 |
| C | -3.77775863 | -5.68990345 | -3.31560890 |
| H | -4.84240115 | -5.90666162 | -3.28442298 |
| C | -3.18113381 | -5.00697065 | -2.25757168 |
| H | -3.77384523 | -4.71274453 | -1.39492626 |
| C | -1.90092086 | -3.19362544 | -0.12291538 |
| C | -1.90531006 | -1.75279845 | -0.44194311 |
| H | -2.59856987 | -1.21900920 | -1.08527954 |
| C | -0.63238014 | -1.40288985 | -0.08438938 |
| C | -0.07904942 | -0.04300086 | 0.02439147  |
| C | 1.29741285  | 0.19626315  | -0.12395344 |
| H | 1.96273932  | -0.63671175 | -0.33432380 |
| C | 1.80983010  | 1.48959432  | -0.03440070 |
| H | 2.87725278  | 1.65593605  | -0.15467594 |
| C | 0.95523942  | 2.57001353  | 0.19666334  |
| H | 1.35500153  | 3.57822393  | 0.26529685  |
| C | -0.41637412 | 2.34613739  | 0.34478261  |
| H | -1.08698723 | 3.18053791  | 0.53357511  |
| C | -0.92589612 | 1.05198268  | 0.26997039  |

|   |             |             |            |
|---|-------------|-------------|------------|
| H | -1.98700360 | 0.87103019  | 0.42050449 |
| C | 0.18904817  | -2.61684359 | 0.10211002 |
| H | 1.02443111  | -2.57187934 | 0.80236162 |
| C | -2.29102392 | -3.73682125 | 1.16561584 |
| C | -2.22286684 | -5.12889965 | 1.40214726 |
| H | -1.84271062 | -5.77820718 | 0.62025862 |
| C | -2.63692808 | -5.66075295 | 2.61865926 |
| H | -2.57301167 | -6.73265076 | 2.78620677 |
| C | -3.14898627 | -4.82613634 | 3.61667270 |
| H | -3.48599998 | -5.24621321 | 4.56039244 |
| C | -3.25403291 | -3.44923578 | 3.38251038 |
| H | -3.66897194 | -2.79876540 | 4.14797317 |
| C | -2.84501357 | -2.91038359 | 2.17005726 |
| H | -2.93795093 | -1.84602347 | 1.97929058 |

ts7p<sub>h</sub>h\_124

E [Hartrees] = -925.3023984815

Gcorr [kcal/mol] = 183.716

|   |             |             |             |
|---|-------------|-------------|-------------|
| H | -2.77733508 | -3.77419659 | -0.67054409 |
| C | -2.45402094 | -2.89848899 | -0.10620231 |
| C | -2.68465257 | -1.61569446 | -0.46668822 |
| H | -2.95943815 | -1.23607392 | -1.44708543 |
| C | -2.16563189 | -0.84114429 | 0.68529658  |
| C | -0.67706322 | -0.85072713 | 0.71969403  |
| C | -0.41232609 | -2.12171389 | 1.15570568  |
| H | 0.56992090  | -2.47674205 | 1.47042171  |
| C | -1.54292091 | -3.04650564 | 1.05522708  |
| C | -1.65996729 | -4.18121132 | 1.95289641  |
| C | -2.67692657 | -5.15399290 | 1.79000664  |
| H | -3.41040701 | -5.03527530 | 0.99967871  |
| C | -2.76713801 | -6.25355658 | 2.63582023  |
| H | -3.55617729 | -6.98512542 | 2.48168361  |
| C | -1.86219306 | -6.41311860 | 3.68954148  |
| H | -1.94102220 | -7.26749245 | 4.35617090  |
| C | -0.87229957 | -5.44709390 | 3.89331633  |
| H | -0.17960058 | -5.54581540 | 4.72517230  |
| C | -0.77881577 | -4.34604585 | 3.05013631  |
| H | -0.02969172 | -3.58786950 | 3.25168068  |
| C | 0.19730087  | 0.19632902  | 0.22513055  |
| C | -0.30280137 | 1.50475453  | 0.06642783  |
| H | -1.34017630 | 1.70630407  | 0.32196554  |
| C | 0.51983930  | 2.53440494  | -0.38597704 |
| H | 0.11355323  | 3.53559944  | -0.50461574 |
| C | 1.86422317  | 2.28623967  | -0.66955400 |

|   |             |             |             |
|---|-------------|-------------|-------------|
| H | 2.50876896  | 3.09027426  | -1.01409421 |
| C | 2.37661947  | 0.99299832  | -0.50971693 |
| H | 3.41989244  | 0.79104012  | -0.73890407 |
| C | 1.55381453  | -0.04211739 | -0.08017495 |
| H | 1.94686622  | -1.05142842 | 0.00378758  |
| C | -2.94912617 | -0.55891369 | 1.85765811  |
| C | -4.35071410 | -0.77650324 | 1.88150301  |
| H | -4.82798043 | -1.20363496 | 1.00552076  |
| C | -5.09652186 | -0.46414613 | 3.00822480  |
| H | -6.16776902 | -0.64779524 | 3.01260803  |
| C | -4.47948787 | 0.09657587  | 4.13480544  |
| H | -5.07077570 | 0.35369481  | 5.00928575  |
| C | -3.10351417 | 0.35101692  | 4.11619747  |
| H | -2.62365507 | 0.80375854  | 4.97989643  |
| C | -2.34723306 | 0.04245537  | 2.99324579  |
| H | -1.28365690 | 0.25612604  | 2.97164241  |

ts8hh\_124

E [Hartrees] = -925.3021835549

Gcorr [kcal/mol] = 181.351

|   |             |             |             |
|---|-------------|-------------|-------------|
| C | -2.21319944 | 1.58907306  | -1.90778418 |
| C | -3.60433358 | 1.83673375  | -2.10688233 |
| C | -2.93582943 | -0.22230937 | -0.56584762 |
| C | -3.99769787 | -0.26079914 | -1.53946328 |
| C | -4.64884648 | 1.03520851  | -1.58513565 |
| C | -6.06570424 | 1.35775111  | -1.54961272 |
| C | -4.08008140 | -1.27664964 | -2.56302524 |
| C | -4.94732600 | -1.14989891 | -3.67469157 |
| H | -5.56390353 | -0.26166973 | -3.76441962 |
| C | -4.98875967 | -2.13881866 | -4.64512243 |
| H | -5.65379496 | -2.03461029 | -5.49786489 |
| C | -4.16814475 | -3.27150791 | -4.53192649 |
| H | -4.20852433 | -4.04590390 | -5.29352926 |
| C | -3.30988113 | -3.41258989 | -3.43844396 |
| H | -2.68119310 | -4.29425997 | -3.35021194 |
| C | -3.27581089 | -2.43190557 | -2.45203347 |
| H | -2.64627246 | -2.53326991 | -1.57366022 |
| H | -3.27776228 | 0.01145358  | 0.45228535  |
| H | -3.88451086 | 2.66324088  | -2.76211001 |
| C | -1.83557432 | 0.63147261  | -0.95637744 |
| C | -0.57390152 | 0.66245307  | -0.20723832 |
| H | -1.49050678 | 2.24125399  | -2.38987855 |
| C | 1.85436822  | 0.64374723  | 1.22591570  |
| C | 1.45660105  | 1.78878002  | 0.52927240  |

|   |             |             |             |
|---|-------------|-------------|-------------|
| C | 0.25242668  | 1.80280314  | -0.16930164 |
| C | -0.15750984 | -0.48186396 | 0.49878573  |
| C | 1.03753199  | -0.48977074 | 1.21348922  |
| H | 2.79085017  | 0.63763623  | 1.77740010  |
| H | 2.08000895  | 2.67911768  | 0.54592544  |
| H | -0.06831345 | 2.71087893  | -0.67053019 |
| H | -0.78814881 | -1.36594836 | 0.46424558  |
| H | 1.33855942  | -1.38393146 | 1.75333906  |
| C | -6.53398175 | 2.67799833  | -1.71878898 |
| C | -7.02300556 | 0.34486573  | -1.32588758 |
| H | -6.68481683 | -0.67631274 | -1.17071567 |
| C | -8.38413376 | 0.63435500  | -1.30515318 |
| H | -5.81957378 | 3.48701610  | -1.84348103 |
| C | -7.89649715 | 2.96098778  | -1.70875942 |
| H | -9.09915969 | -0.16593290 | -1.13137275 |
| C | -8.83273779 | 1.94280731  | -1.50444442 |
| H | -8.23085388 | 3.98611801  | -1.84763643 |
| H | -9.89521626 | 2.16880351  | -1.48664912 |

ts8hph\_123

E [Hartrees] = -925.3064004932

Gcorr [kcal/mol] = 185.426

|   |             |             |             |
|---|-------------|-------------|-------------|
| C | -2.58261530 | 1.63140923  | 1.22096965  |
| C | -3.82739129 | 1.52134401  | 0.61096421  |
| C | -2.38584051 | -0.56684834 | 0.48824012  |
| C | -3.15614942 | -0.39561826 | -0.78426859 |
| C | -4.06703187 | 0.59741123  | -0.49908767 |
| H | -4.92419484 | 0.78696040  | -1.14535681 |
| C | -3.02694296 | -1.21338098 | -1.97720066 |
| C | -3.69294049 | -0.91302920 | -3.18427406 |
| H | -4.28974684 | -0.00810919 | -3.25568302 |
| C | -3.57439178 | -1.75053881 | -4.28751279 |
| H | -4.09563353 | -1.50257950 | -5.20855798 |
| C | -2.77642118 | -2.89967873 | -4.22570780 |
| H | -2.67935079 | -3.54605163 | -5.09348768 |
| C | -2.10267462 | -3.20430315 | -3.04233586 |
| H | -1.48177911 | -4.09421035 | -2.97913719 |
| C | -2.23012258 | -2.37602969 | -1.93029725 |
| H | -1.72855305 | -2.63139744 | -1.00224774 |
| C | -2.79051066 | -1.49599040 | 1.49543995  |
| C | -3.71559291 | -2.54342917 | 1.22469582  |
| H | -4.26623804 | -2.53081882 | 0.28982015  |
| C | -3.88588096 | -3.58385620 | 2.12423749  |
| H | -4.57588852 | -4.39051931 | 1.89099243  |



|   |             |             |             |
|---|-------------|-------------|-------------|
| C | -3.15480233 | -3.61701802 | 3.32151587  |
| H | -3.26820446 | -4.45413223 | 4.00499220  |
| C | -2.24654321 | -2.59214749 | 3.61230305  |
| H | -1.65948259 | -2.62956575 | 4.52620424  |
| C | -2.05124371 | -1.55653349 | 2.70962762  |
| H | -1.28871416 | -0.80443222 | 2.88651277  |
| H | -4.59442587 | 2.26638933  | 0.81630998  |
| C | -1.63870444 | 0.63601354  | 0.79836511  |
| C | -0.33100131 | 0.87428624  | 0.24544908  |
| H | -2.30035675 | 2.54778058  | 1.73995446  |
| C | 2.29124242  | 1.18583286  | -0.75157336 |
| C | 1.52862490  | 2.30827392  | -0.39748263 |
| C | 0.23229908  | 2.16222424  | 0.07754992  |
| C | 0.46447510  | -0.24793550 | -0.09391292 |
| C | 1.74567125  | -0.09186730 | -0.60915594 |
| H | 3.30369397  | 1.30862117  | -1.12534290 |
| H | 1.94933690  | 3.30377249  | -0.51340057 |
| H | -0.36789937 | 3.03904713  | 0.30247735  |
| H | 0.06526347  | -1.24111990 | 0.08977848  |
| H | 2.33050442  | -0.97026984 | -0.86930522 |

ts8hph\_124

E [Hartrees] = -925.2926616814

Gcorr [kcal/mol] = 184.682

|   |             |             |             |
|---|-------------|-------------|-------------|
| C | -1.22464034 | 1.90580013  | -0.79515426 |
| C | -0.86121915 | 0.88240256  | -1.79596460 |
| C | -0.27623986 | -0.29546804 | -1.30246224 |
| C | 0.04465177  | 2.30968871  | -0.45169517 |
| C | 1.07241220  | 0.06469247  | -1.08562032 |
| C | 1.20108294  | 1.50069671  | -0.91759209 |
| H | -0.49383637 | 1.29357442  | -2.74004645 |
| H | -0.77603730 | -1.04293690 | -0.68704886 |
| C | 2.11537452  | -0.93011271 | -0.75154934 |
| C | -2.51803093 | 2.23972122  | -0.22387322 |
| H | 0.23431721  | 3.21773791  | 0.11865904  |
| C | 2.52308614  | 2.15877684  | -1.02459428 |
| C | 3.10977319  | -0.70525023 | 0.21877212  |
| C | 2.07845575  | -2.18380205 | -1.38590311 |
| C | 2.92628712  | 3.19980434  | -0.16569688 |
| C | 3.42771102  | 1.73859351  | -2.01871201 |
| C | -3.69437490 | 1.80962801  | -0.86651723 |
| C | -2.64076250 | 2.99532707  | 0.95958327  |
| H | -1.74500277 | 3.30590722  | 1.48991440  |
| C | -3.89450434 | 3.32120878  | 1.46613023  |

|   |             |             |             |
|---|-------------|-------------|-------------|
| H | -3.60859874 | 1.23558999  | -1.78619577 |
| C | -4.94836292 | 2.12187817  | -0.34657454 |
| H | 2.26112584  | 3.54394629  | 0.62037371  |
| C | 4.18937265  | 3.77561989  | -0.28105424 |
| H | 3.12863443  | 0.94450307  | -2.69565062 |
| C | 4.68532477  | 2.32256193  | -2.14241277 |
| H | 3.14530945  | 0.24761777  | 0.73622030  |
| C | 4.03850109  | -1.69473602 | 0.52865196  |
| H | 1.31807943  | -2.36094737 | -2.14204713 |
| C | 3.00322036  | -3.17851330 | -1.06932407 |
| C | -5.05534870 | 2.88467743  | 0.81825878  |
| H | -3.96966993 | 3.90563171  | 2.37952119  |
| H | -5.84406653 | 1.77692160  | -0.85653427 |
| H | 4.79768455  | -1.50117429 | 1.28213088  |
| C | 3.99110386  | -2.93599306 | -0.11381151 |
| H | 2.95643329  | -4.13970925 | -1.57482877 |
| C | 5.07450349  | 3.34278346  | -1.27151582 |
| H | 4.48325967  | 4.56640398  | 0.40418276  |
| H | 5.36246778  | 1.98120603  | -2.92078219 |
| H | -6.03289088 | 3.13468066  | 1.22128817  |
| H | 6.05601239  | 3.79941250  | -1.36551325 |
| H | 4.71743833  | -3.70641857 | 0.13118968  |

ts8paph\_124

E [Hartrees] = -925.2983997061

Gcorr [kcal/mol] = 185.146

|   |             |             |             |
|---|-------------|-------------|-------------|
| H | -2.93755926 | -3.82178611 | -0.39888999 |
| C | -2.57523647 | -2.95983415 | 0.16185578  |
| C | -2.85894363 | -1.68796135 | -0.20263648 |
| H | -3.24393521 | -1.35052365 | -1.16072574 |
| C | -2.29350163 | -0.85670230 | 0.89089878  |
| C | -0.81079989 | -0.90334666 | 0.92977228  |
| C | -0.52495774 | -2.17439121 | 1.37068556  |
| H | 0.47890343  | -2.48228736 | 1.66463429  |
| C | -1.56621091 | -3.16845069 | 1.23081040  |
| C | -1.51346768 | -4.42220276 | 1.96327267  |
| C | -2.42614271 | -5.47857489 | 1.71275344  |
| H | -3.22715946 | -5.34007098 | 0.99514109  |
| C | -2.33058951 | -6.69479155 | 2.37924437  |
| H | -3.04474900 | -7.48348488 | 2.15610715  |
| C | -1.33588679 | -6.90386196 | 3.33882464  |
| H | -1.26824210 | -7.85225514 | 3.86446578  |
| C | -0.44720485 | -5.86508258 | 3.63312607  |
| H | 0.31428363  | -6.00138172 | 4.39693153  |

|   |             |             |             |
|---|-------------|-------------|-------------|
| C | -0.54062349 | -4.64700719 | 2.97141277  |
| H | 0.13353915  | -3.84490945 | 3.25167341  |
| C | 0.06567374  | 0.11206053  | 0.38173518  |
| C | -0.42947954 | 1.41252542  | 0.13787224  |
| H | -1.46993427 | 1.63285016  | 0.36014886  |
| C | 0.40108275  | 2.41436949  | -0.36026228 |
| H | -0.00514420 | 3.40557947  | -0.54560540 |
| C | 1.75084585  | 2.15488479  | -0.60338627 |
| H | 2.40119135  | 2.93838727  | -0.98239591 |
| C | 2.25950572  | 0.87244281  | -0.35901307 |
| H | 3.30674973  | 0.65818667  | -0.55745784 |
| C | 1.43013734  | -0.13831205 | 0.11007560  |
| H | 1.82454224  | -1.14034869 | 0.25159618  |
| C | -3.07801923 | -0.27693016 | 1.91994656  |
| C | -4.50061150 | -0.34803446 | 1.89929119  |
| H | -4.98130609 | -0.90187155 | 1.09926296  |
| C | -5.25079018 | 0.27254745  | 2.88273758  |
| H | -6.33519020 | 0.20841173  | 2.85769604  |
| C | -4.61739888 | 0.99324353  | 3.90805796  |
| H | -5.21306155 | 1.49422795  | 4.66611929  |
| C | -3.22008866 | 1.08933156  | 3.93851315  |
| H | -2.73324758 | 1.65883015  | 4.72544287  |
| C | -2.45547631 | 0.47397026  | 2.95915801  |
| H | -1.37441968 | 0.56263707  | 2.96159790  |

tstrmr

E [Hartrees] = -925.1349444598

|   |             |             |             |
|---|-------------|-------------|-------------|
| C | 2.16495047  | 0.23682889  | 1.75399428  |
| C | 4.32185333  | 0.28286757  | 1.05211593  |
| C | 4.46625492  | 0.61386817  | -0.13347928 |
| C | 2.76199286  | 1.07098204  | -1.63476576 |
| C | 1.66466728  | 0.67771810  | -1.22220588 |
| C | 1.16481441  | 0.14754813  | 1.02914278  |
| C | -0.23219097 | -0.08540684 | 0.77333911  |
| C | 4.88553528  | -0.15237731 | 2.30991065  |
| C | 3.62122140  | 1.67445711  | -2.62477872 |
| C | 4.39461827  | 0.87639871  | -3.48786656 |
| C | 5.21070575  | 1.46730421  | -4.45159570 |
| C | 5.27761827  | 2.85783808  | -4.56266187 |
| C | 4.52129379  | 3.65665940  | -3.70086126 |
| C | 3.70257480  | 3.07419141  | -2.73552949 |
| C | -2.47245337 | 0.74802053  | 0.33017691  |
| C | -1.11915681 | 0.98763315  | 0.56196890  |
| C | -0.73133710 | -1.40060104 | 0.72105977  |

|   |             |             |             |
|---|-------------|-------------|-------------|
| C | -2.08504858 | -1.63089701 | 0.48543720  |
| C | -2.96141301 | -0.55996851 | 0.29058422  |
| C | 5.81301567  | -1.91546720 | 3.69879894  |
| C | 5.99081921  | -1.00983202 | 4.74799954  |
| C | 5.61027279  | 0.32339176  | 4.58036651  |
| C | 5.05568104  | 0.75111730  | 3.37468909  |
| C | 5.26087453  | -1.49557131 | 2.49028553  |
| H | 2.56989265  | 0.26129117  | 2.74506430  |
| H | 5.10556321  | 0.83008226  | -0.96376531 |
| H | 0.62577562  | 0.46763148  | -1.36177267 |
| H | 4.33887560  | -0.20474557 | -3.40026813 |
| H | 5.79495021  | 0.83830523  | -5.11806972 |
| H | 5.91614540  | 3.31591872  | -5.31291999 |
| H | 4.57096466  | 4.73956127  | -3.77873918 |
| H | 3.11748801  | 3.69190915  | -2.06123523 |
| H | -3.14698649 | 1.58668925  | 0.17892696  |
| H | -0.73513989 | 2.00302089  | 0.58912644  |
| H | -0.04742314 | -2.23043362 | 0.87048544  |
| H | -2.45691123 | -2.65163637 | 0.45230717  |
| H | -4.01620322 | -0.74364965 | 0.10589641  |
| H | 6.10354676  | -2.95545413 | 3.82250935  |
| H | 6.41989674  | -1.34146663 | 5.68946837  |
| H | 5.74532040  | 1.03491253  | 5.39074274  |
| H | 4.75990996  | 1.78782102  | 3.24143963  |
| H | 5.11694665  | -2.19749617 | 1.67472129  |

### Methylacetylene Stationary Points

123me3ph

E [Hartrees] = -350.2139504572

Gcorr [kcal/mol] = 96.218

|   |             |             |             |
|---|-------------|-------------|-------------|
| C | 1.25143891  | 0.05389368  | 0.01902023  |
| C | 1.24099056  | -1.35754773 | 0.02981038  |
| C | 0.02094897  | -2.04105831 | 0.04596556  |
| C | -1.18552503 | -1.34509295 | 0.05142453  |
| C | -1.17363258 | 0.04685061  | 0.04054819  |
| C | 0.03161108  | 0.76084742  | 0.02433722  |
| C | -0.01090109 | 2.27463944  | 0.01288284  |
| C | 2.58341302  | 0.77229128  | 0.00179047  |
| H | -2.11319981 | 0.59465713  | 0.04455768  |
| C | 2.53748077  | -2.13425522 | 0.02392086  |
| H | 0.02067220  | -3.12869728 | 0.05430974  |
| H | -2.12919033 | -1.88425935 | 0.06406345  |
| H | 3.19101295  | 0.50605685  | 0.87666833  |
| H | 2.47828960  | 1.85825849  | -0.00335811 |

|   |             |             |             |
|---|-------------|-------------|-------------|
| H | 3.17382201  | 0.49595692  | -0.88172638 |
| H | 3.15918335  | -1.89484619 | 0.89660024  |
| H | 3.14348703  | -1.90772573 | -0.86312372 |
| H | 2.35261059  | -3.21277797 | 0.03348817  |
| H | 0.49221790  | 2.70581477  | 0.88743323  |
| H | -1.04433567 | 2.63473875  | 0.01882646  |
| H | 0.47732974  | 2.69201066  | -0.87665334 |

#### 124me3ph

E [Hartrees] = -350.2162015906

Gcorr [kcal/mol] = 95.582

|   |             |             |             |
|---|-------------|-------------|-------------|
| C | 1.23951598  | 0.03651457  | 0.01962561  |
| C | 1.24530317  | -1.37474885 | 0.03537579  |
| C | 0.02082860  | -2.04774683 | 0.03424716  |
| C | -1.19166532 | -1.35668282 | 0.01896107  |
| C | -1.21201214 | 0.03977994  | 0.00629110  |
| C | 0.01696968  | 0.71244970  | 0.00435188  |
| H | 0.02069392  | 1.80142969  | -0.01118449 |
| C | 2.53819217  | 0.80787111  | 0.01524094  |
| C | -2.51230139 | 0.80955205  | 0.01933704  |
| C | 2.54642247  | -2.14111857 | 0.04792480  |
| H | 0.01480499  | -3.13575548 | 0.04174092  |
| H | -2.12795486 | -1.91049045 | 0.01576782  |
| H | -2.75277951 | 1.16789005  | 1.02933030  |
| H | -3.35000970 | 0.18836494  | -0.31505501 |
| H | -2.46414362 | 1.69018578  | -0.63157637 |
| H | 3.14533381  | 0.58111746  | 0.90153977  |
| H | 2.36090871  | 1.88768606  | -0.00026360 |
| H | 3.15432066  | 0.55713967  | -0.85828990 |
| H | 3.15643487  | -1.89027509 | 0.92578512  |
| H | 3.15954993  | -1.91365376 | -0.83416440 |
| H | 2.37142633  | -3.22141331 | 0.06186943  |

#### 135me3ph

E [Hartrees] = -350.2159746401

Gcorr [kcal/mol] = 94.781

|   |             |             |             |
|---|-------------|-------------|-------------|
| C | 1.22452376  | 0.02177673  | -0.03429909 |
| C | 1.23437323  | -1.37781715 | 0.01768103  |
| C | 0.01155437  | -2.05321724 | 0.06468755  |
| C | -1.20593164 | -1.36085450 | 0.06733955  |
| C | -1.18048594 | 0.03563301  | 0.01448863  |
| C | 0.02733359  | 0.74311337  | -0.03345597 |
| C | 0.03050179  | 2.25437459  | -0.06531241 |
| H | 2.17039854  | 0.55886048  | -0.08338420 |

|   |             |             |             |
|---|-------------|-------------|-------------|
| H | -2.12012413 | 0.58576129  | 0.00340468  |
| C | 2.54170699  | -2.13622680 | 0.04172220  |
| H | 0.00454449  | -3.14165544 | 0.09305852  |
| C | -2.51639223 | -2.11010763 | 0.14611141  |
| H | 2.94586448  | -2.19583409 | 1.06127954  |
| H | 3.30127223  | -1.64682257 | -0.57828572 |
| H | 2.41863822  | -3.16243892 | -0.32060736 |
| H | -0.09185448 | 2.67186465  | 0.94316434  |
| H | -0.79058735 | 2.64450221  | -0.67738009 |
| H | 0.96977069  | 2.64668735  | -0.46941008 |
| H | -2.78538017 | -2.32809374 | 1.18850591  |
| H | -2.46317286 | -3.06926241 | -0.38104344 |
| H | -3.33827387 | -1.53032776 | -0.28769787 |

int1b\_14eee

E [Hartrees] = -233.2753689635

Gcorr [kcal/mol] = 53.540

|   |             |             |             |
|---|-------------|-------------|-------------|
| H | -2.23662154 | -2.59846875 | -2.36197152 |
| C | -1.81225518 | -2.56652277 | -1.34917441 |
| C | -1.29426086 | -1.42882507 | -0.91009670 |
| C | -1.07963643 | -0.05290567 | -1.38442483 |
| H | -0.01383625 | 0.21190733  | -1.39319666 |
| H | -1.46264315 | 0.07363457  | -2.41178404 |
| H | -1.59147341 | 0.68075506  | -0.74733998 |
| C | -1.87193736 | -3.81438634 | -0.58891664 |
| H | -1.44759385 | -3.78229735 | 0.42388548  |
| C | -2.39008327 | -4.95218207 | -1.02757633 |
| C | -2.60483577 | -6.32762728 | -0.55180552 |
| H | -2.22057238 | -6.45300560 | 0.47519616  |
| H | -3.67074586 | -6.59187672 | -0.54136404 |
| H | -2.09410709 | -7.06222307 | -1.18870121 |

int1b\_14eez

E [Hartrees] = -233.2753506503

Gcorr [kcal/mol] = 53.295

|   |             |             |             |
|---|-------------|-------------|-------------|
| H | -2.24202574 | -2.59252203 | -2.38245055 |
| C | -1.81628153 | -2.55481705 | -1.37036704 |
| C | -1.30166147 | -1.42077754 | -0.93371164 |
| C | -1.07267479 | -0.03674120 | -1.37405678 |
| H | -0.00468902 | 0.21874235  | -1.36846227 |
| H | -1.44691566 | 0.11934127  | -2.40061086 |
| H | -1.58254919 | 0.68525032  | -0.72240619 |
| C | -1.87169301 | -3.81303763 | -0.59544090 |
| H | -1.44722114 | -3.76851246 | 0.40773594  |

|   |             |             |             |
|---|-------------|-------------|-------------|
| C | -2.38991388 | -4.94813360 | -1.03783649 |
| C | -3.04340996 | -5.48708570 | -2.24087371 |
| H | -2.47690240 | -6.32474895 | -2.66860754 |
| H | -4.05485559 | -5.85399259 | -2.02202553 |
| H | -3.13404218 | -4.71455046 | -3.02469398 |

int1b\_14eze

E [Hartrees] = -233.2712169964

Gcorr [kcal/mol] = 53.057

|   |             |             |             |
|---|-------------|-------------|-------------|
| H | -1.68678457 | -3.25261630 | -2.61801370 |
| C | -1.62585855 | -2.89431135 | -1.58052811 |
| C | -1.06529807 | -1.71341093 | -1.35992016 |
| C | -0.44045565 | -0.62773500 | -2.13023254 |
| H | 0.60011587  | -0.45776554 | -1.82251155 |
| H | -0.43459559 | -0.86299130 | -3.20882509 |
| H | -0.97596046 | 0.32250886  | -2.00122857 |
| C | -2.18370869 | -3.78788981 | -0.55921011 |
| H | -2.61100978 | -4.73142869 | -0.92747676 |
| C | -2.21445402 | -3.55601840 | 0.74567136  |
| C | -2.68065523 | -4.21838456 | 1.97305247  |
| H | -3.14052223 | -5.19525900 | 1.74290615  |
| H | -1.85634280 | -4.39761410 | 2.67642899  |
| H | -3.43146660 | -3.61474718 | 2.50055647  |

int1b\_14zez

E [Hartrees] = -233.2789053585

Gcorr [kcal/mol] = 53.582

|   |             |             |             |
|---|-------------|-------------|-------------|
| H | -2.25197026 | -2.62858921 | -2.37437735 |
| C | -1.82156284 | -2.55960880 | -1.37501015 |
| C | -1.30612971 | -1.42863745 | -0.93915982 |
| C | -0.65116390 | -0.87325188 | 0.25410294  |
| H | -1.22116246 | -0.03477540 | 0.67509008  |
| H | -0.55269898 | -1.63739356 | 1.04539638  |
| H | 0.35701628  | -0.50315102 | 0.02655879  |
| C | -1.86335021 | -3.82079516 | -0.56123145 |
| H | -1.43356225 | -3.75178278 | 0.43840484  |
| C | -2.37806478 | -4.95188729 | -0.99756387 |
| C | -3.03205440 | -5.50735902 | -2.19133730 |
| H | -3.12871396 | -4.74362290 | -2.98317634 |
| H | -2.46228951 | -6.34658028 | -2.61112720 |
| H | -4.04086606 | -5.87637655 | -1.96489147 |

int1c

E [Hartrees] = -233.2506146903

Gcorr [kcal/mol] = 53.516

|   |             |             |             |
|---|-------------|-------------|-------------|
| C | -1.86835927 | 1.40143619  | -0.36292935 |
| C | -0.80216043 | 0.83135135  | 0.03636751  |
| C | 0.02463091  | 3.08263498  | -0.83169664 |
| C | -0.78774874 | 2.40510330  | 0.13297686  |
| C | 0.13544128  | -0.26285788 | 0.33861039  |
| C | 0.56280994  | 4.38408978  | -0.33806339 |
| H | -2.86495792 | 1.42346430  | -0.77215724 |
| H | -0.94963524 | 2.80995778  | 1.14789091  |
| H | 0.43768982  | -0.23247824 | 1.39249245  |
| H | 1.04102536  | -0.14690516 | -0.26874681 |
| H | -0.31367483 | -1.23916996 | 0.12820048  |
| H | 0.50818878  | 4.59346707  | 0.74813826  |
| H | -0.04764277 | 5.15028478  | -0.84929288 |
| H | 1.58570547  | 4.56329624  | -0.69481941 |

int2\_12

E [Hartrees] = -233.3317296429

Gcorr [kcal/mol] = 55.906

|   |             |             |             |
|---|-------------|-------------|-------------|
| H | -0.00001463 | 1.54592294  | -2.09195726 |
| C | -0.00002880 | 0.78356704  | -1.32021012 |
| C | -0.00004714 | -0.78356579 | -1.32021108 |
| H | -0.00004596 | -1.54591106 | -2.09196900 |
| C | -0.00002799 | -0.79879285 | 0.01683076  |
| C | -0.00002547 | 0.79879214  | 0.01683199  |
| C | 0.00001149  | 1.81672084  | 1.09549038  |
| H | 0.88093339  | 1.71360116  | 1.74603940  |
| H | 0.00016108  | 2.83081731  | 0.68028324  |
| H | -0.88104987 | 1.71385976  | 1.74590469  |
| C | 0.00002248  | -1.81673370 | 1.09547614  |
| H | 0.88091123  | -1.71356353 | 1.74606288  |
| H | 0.00023283  | -2.83082553 | 0.68026891  |
| H | -0.88103263 | -1.71388872 | 1.74590791  |

int2\_13

E [Hartrees] = -233.3323853491

|   |             |             |             |
|---|-------------|-------------|-------------|
| C | 0.83769220  | 0.46390251  | -0.11848317 |
| C | -0.83621065 | -0.46742659 | 0.67741608  |
| C | -0.69721571 | 0.74410086  | 0.12664239  |
| C | 0.69868252  | -0.74764406 | 0.43226628  |
| C | 1.56661550  | -1.91296587 | 0.72353241  |
| C | -1.56534973 | 1.90921348  | -0.16490658 |
| H | -1.65924981 | -1.02496969 | 1.11103677  |
| H | 1.66062835  | 1.02119877  | -0.55250483 |



|   |             |             |             |
|---|-------------|-------------|-------------|
| H | 1.57407718  | -2.14133135 | 1.79944296  |
| H | 2.59804986  | -1.73314034 | 0.40129431  |
| H | 1.19767167  | -2.81708670 | 0.21725503  |
| H | -1.57307831 | 2.13725281  | -1.24090020 |
| H | -1.19663653 | 2.81354900  | 0.34111978  |
| H | -2.59667877 | 1.72918670  | 0.15743418  |

int3bhh\_12

E [Hartrees] = -350.0114949258

Gcorr [kcal/mol] = 90.224

|   |             |             |             |
|---|-------------|-------------|-------------|
| C | 1.28678596  | -0.29630031 | 0.10642370  |
| C | -0.08552374 | 0.29704693  | -0.15741346 |
| C | -1.26485069 | -0.46548835 | 0.47914666  |
| C | -1.79052478 | -0.78692931 | -0.77921338 |
| C | -0.76868516 | -0.11615774 | -1.47008268 |
| C | 2.32669382  | 0.35843323  | 0.57925976  |
| C | 2.71372727  | 1.71306293  | 1.01033284  |
| H | 1.36717259  | -1.36308271 | -0.11715471 |
| H | -0.08515468 | 1.37762607  | 0.04044614  |
| C | -1.61394877 | -0.74764615 | 1.89315225  |
| C | -3.00398882 | -1.55108753 | -1.20843770 |
| H | -0.50919382 | 0.02494225  | -2.51311115 |
| H | 3.55004527  | 2.10135209  | 0.41428695  |
| H | 3.03001551  | 1.72613560  | 2.06162044  |
| H | 1.87620889  | 2.42443262  | 0.90774732  |
| H | -3.78039753 | -0.87734501 | -1.59301224 |
| H | -3.43520695 | -2.11308149 | -0.37281764 |
| H | -2.76342491 | -2.26013946 | -2.00910067 |
| H | -0.75540267 | -1.16915628 | 2.43526467  |
| H | -2.44717873 | -1.45627761 | 1.96734343  |
| H | -1.90512847 | 0.16632805  | 2.43433423  |

int3bhh\_13

E [Hartrees] = -349.9715688798

Gcorr [kcal/mol] = 89.194

|   |             |             |             |
|---|-------------|-------------|-------------|
| C | 1.15627704  | -0.17215406 | 0.14503515  |
| C | -0.16710929 | 0.62685648  | 0.01546682  |
| C | -1.33209701 | -0.28454061 | 0.58135247  |
| C | -1.82073755 | -0.46002610 | -0.68712767 |
| C | -0.84680162 | 0.41744018  | -1.27686125 |
| C | 2.31363092  | 0.29091074  | 0.55708647  |
| C | 2.89796548  | 1.64691826  | 0.59054773  |
| H | 0.94924639  | -1.24401067 | 0.02147319  |
| H | -0.06110480 | 1.65104284  | 0.38951145  |

|   |             |             |             |
|---|-------------|-------------|-------------|
| C | -1.64628261 | -0.75109724 | 1.94890856  |
| H | -2.62968375 | -1.06082561 | -1.09551893 |
| C | -0.50336896 | 0.82146389  | -2.65790941 |
| H | 3.65827911  | 1.74679123  | -0.19764959 |
| H | 3.40130229  | 1.86322043  | 1.54142780  |
| H | 2.15294701  | 2.45049125  | 0.40728756  |
| H | -2.04247781 | 0.07521078  | 2.56079218  |
| H | -0.74208523 | -1.10722707 | 2.45851572  |
| H | -2.39214935 | -1.55319931 | 1.94340242  |
| H | 0.07797717  | 1.75100489  | -2.66808727 |
| H | -1.40447875 | 0.95675492  | -3.26919600 |
| H | 0.10784113  | 0.05495595  | -3.16375028 |

int3bhme\_12

E [Hartrees] = -349.9597177441

Gcorr [kcal/mol] = 88.996

|   |             |             |             |
|---|-------------|-------------|-------------|
| C | 1.00226191  | -0.24773485 | 0.32652751  |
| C | -0.20943214 | 0.63090246  | -0.01066529 |
| C | -1.46690364 | -0.04656673 | 0.56476483  |
| C | -1.85833946 | -0.46429394 | -0.71367804 |
| C | -0.78377184 | 0.16151681  | -1.35021040 |
| C | 2.18283101  | 0.10157276  | 0.80628495  |
| C | 3.02640760  | 1.22041502  | 1.24418469  |
| H | 0.78812146  | -1.30340252 | 0.12420980  |
| C | -0.04928625 | 2.12388996  | 0.21885189  |
| C | -1.94332769 | -0.24167277 | 1.95334025  |
| H | -2.68128866 | -1.08070790 | -1.06721951 |
| H | -0.38345537 | 0.16801033  | -2.35723165 |
| H | 0.16326382  | 2.33614066  | 1.27328045  |
| H | -0.96758011 | 2.65019957  | -0.06212517 |
| H | 0.77573642  | 2.52520889  | -0.38026315 |
| H | -1.18948678 | -0.75446937 | 2.56720755  |
| H | -2.86521781 | -0.83233153 | 1.98127239  |
| H | -2.13919451 | 0.72205275  | 2.44940639  |
| H | 3.37326824  | 1.07053265  | 2.27647691  |
| H | 2.52568734  | 2.20615163  | 1.21368187  |
| H | 3.92646050  | 1.29927579  | 0.61821881  |

int3bmeh\_12

E [Hartrees] = -350.0056556312

|   |             |             |             |
|---|-------------|-------------|-------------|
| C | 1.25114417  | -0.22304507 | -0.27566614 |
| C | -0.17751845 | 0.25689378  | -0.03001978 |
| C | -1.18697336 | -0.76016999 | 0.52863746  |
| C | -1.97303775 | -0.68341241 | -0.63326792 |

|   |             |             |             |
|---|-------------|-------------|-------------|
| C | -1.12368719 | 0.24351475  | -1.24954132 |
| C | 2.28036101  | 0.50297636  | 0.11116804  |
| H | 2.41705285  | 1.44850943  | 0.62361136  |
| C | 1.41278599  | -1.54722369 | -0.99216380 |
| H | -0.16156703 | 1.21472561  | 0.50670954  |
| H | -1.24319129 | -1.31051255 | 1.46085278  |
| C | -3.25319685 | -1.32972218 | -1.06208609 |
| C | -1.06670784 | 0.94395915  | -2.55585851 |
| H | 2.46735302  | -1.80318149 | -1.12079093 |
| H | 0.93643610  | -1.51480229 | -1.98030709 |
| H | 0.91945950  | -2.35030351 | -0.43107074 |
| H | -4.08830144 | -1.01722610 | -0.42289685 |
| H | -3.18565846 | -2.42229295 | -0.99605738 |
| H | -3.50417602 | -1.06701408 | -2.09535559 |
| H | -1.13325616 | 2.03612313  | -2.43703591 |
| H | -1.88353447 | 0.62863498  | -3.21534266 |
| H | -0.11585803 | 0.74738951  | -3.07313867 |

int3bmeme\_12

E [Hartrees] = -350.0001699868

Gcorr [kcal/mol] = 90.795

|   |             |             |             |
|---|-------------|-------------|-------------|
| C | 1.21060936  | -0.26092209 | -0.10133485 |
| C | -0.09624791 | 0.53239893  | -0.26331124 |
| C | -1.26754975 | -0.01984736 | 0.59385115  |
| C | -1.98248370 | -0.37391270 | -0.55292133 |
| C | -0.99345759 | 0.07705638  | -1.43421706 |
| C | 2.36479929  | 0.32223113  | 0.14963746  |
| H | 2.74404167  | 1.32637183  | 0.28510880  |
| C | 1.11112888  | -1.77011806 | -0.22529645 |
| C | 0.08591420  | 2.04850483  | -0.15805174 |
| C | -1.44799184 | -0.10462074 | 2.06302675  |
| H | -2.96016232 | -0.82747000 | -0.69894546 |
| H | -0.87513780 | 0.11995884  | -2.51051045 |
| H | 2.08673132  | -2.24079279 | -0.08065253 |
| H | 0.72606042  | -2.05336212 | -1.21215067 |
| H | 0.41205935  | -2.17842116 | 0.51501381  |
| H | 0.49976900  | 2.32890262  | 0.81810101  |
| H | -0.87876967 | 2.55134761  | -0.28033923 |
| H | 0.76799322  | 2.41816650  | -0.93237801 |
| H | -1.41114517 | 0.89001641  | 2.53251623  |
| H | -0.64505355 | -0.69507140 | 2.52962252  |
| H | -2.40653337 | -0.56630568 | 2.32413908  |

int4crbhhh\_12

E [Hartrees] = -349.9745794653

|   |             |             |             |
|---|-------------|-------------|-------------|
| C | 0.90732819  | -0.23979883 | -0.18642048 |
| C | -0.28592320 | 0.67659798  | 0.31061507  |
| C | -1.50748803 | -0.20846600 | 0.54279636  |
| C | -1.51844328 | -0.61512310 | -0.74466481 |
| C | -0.26658118 | 0.19259050  | -1.10212120 |
| C | 2.14116956  | 0.47206384  | 0.03498869  |
| C | 2.34862891  | 1.70886508  | -0.76691162 |
| H | 0.85049151  | -1.26134222 | 0.19274933  |
| H | -0.10817488 | 1.68661223  | 0.66479309  |
| C | -2.23926931 | -0.57298103 | 1.78734151  |
| C | -2.29347683 | -1.61547627 | -1.52984170 |
| H | -0.10817657 | 0.79766062  | -1.98856625 |
| H | -1.63314283 | -2.40468517 | -1.91536502 |
| H | -2.77973502 | -1.15552008 | -2.40047065 |
| H | -3.07131550 | -2.08579537 | -0.91822912 |
| H | 2.95851256  | 2.45169650  | -0.23910432 |
| H | 1.49071827  | 2.20993531  | -1.24975766 |
| H | 2.99329653  | 1.33613193  | -1.58622984 |
| H | -2.73582153 | 0.29760268  | 2.23644292  |
| H | -1.55175213 | -0.97381989 | 2.54473178  |
| H | -3.00541800 | -1.33003848 | 1.58653847  |

int4crbhhme\_12

E [Hartrees] = -349.9671586449

|   |             |             |             |
|---|-------------|-------------|-------------|
| C | 0.90957045  | -0.20811443 | -0.04429200 |
| C | -0.27728481 | 0.70739355  | 0.41743238  |
| C | -1.52178024 | -0.19742843 | 0.57235245  |
| C | -1.49021650 | -0.57859839 | -0.71687178 |
| C | -0.26695981 | 0.27502901  | -1.00769882 |
| C | 2.19158411  | 0.16096873  | -0.58489977 |
| C | 2.46105697  | 1.58743147  | -0.91449931 |
| H | 0.80754849  | -1.24909401 | 0.26798896  |
| C | -0.15886958 | 2.05252037  | 1.08209539  |
| C | -2.30833712 | -0.55541752 | 1.78314519  |
| H | -2.01271538 | -1.32927315 | -1.30113680 |
| H | -0.04551755 | 0.86240223  | -1.89199500 |
| H | 2.99131638  | 1.94896940  | -0.01206506 |
| H | 1.62917109  | 2.28990530  | -1.09426163 |
| H | 3.18877033  | 1.68288564  | -1.72977707 |
| H | -0.15563195 | 1.92965495  | 2.17251994  |
| H | -1.01773565 | 2.68513047  | 0.82288406  |
| H | 0.75131973  | 2.58899617  | 0.81190567  |
| H | -2.75609634 | 0.33476706  | 2.24507823  |

|   |             |             |            |
|---|-------------|-------------|------------|
| H | -1.66274817 | -1.01513141 | 2.54437755 |
| H | -3.11340372 | -1.25778936 | 1.54315007 |

int4crbhme\_12

E [Hartrees] = -349.9692196252

Gcorr [kcal/mol] = 91.923

|   |             |             |             |
|---|-------------|-------------|-------------|
| C | 0.96150302  | -0.22805418 | -0.17636755 |
| C | -0.19760844 | 0.68839858  | 0.32355348  |
| C | -1.43474843 | -0.16277605 | 0.56546803  |
| C | -1.45365403 | -0.64641302 | -0.69116079 |
| C | -0.25688899 | 0.22603772  | -1.10045615 |
| C | 2.23877670  | 0.16987347  | -0.71045409 |
| C | 2.59118968  | 1.60987465  | -0.61895747 |
| H | 0.87590347  | -1.27523192 | 0.11769371  |
| H | -0.01772002 | 1.70266300  | 0.66351387  |
| H | -1.97738057 | -0.41738716 | 1.47219345  |
| C | -2.19598184 | -1.69512977 | -1.44247466 |
| C | -0.17449257 | 0.98526964  | -2.39543088 |
| H | 3.27389484  | 1.60490878  | 0.25336798  |
| H | 1.81550774  | 2.36566133  | -0.40305262 |
| H | 3.21362538  | 1.94385720  | -1.45838244 |
| H | -0.03582052 | 0.30276951  | -3.24233232 |
| H | 0.64051528  | 1.71259558  | -2.41229858 |
| H | -1.11655241 | 1.52557502  | -2.55234978 |
| H | -2.97795869 | -2.14630476 | -0.82243680 |
| H | -1.51930015 | -2.49353118 | -1.77683532 |
| H | -2.67058311 | -1.28388299 | -2.34367913 |

int4crbhmem\_12

E [Hartrees] = -349.9594504730

Gcorr [kcal/mol] = 91.897

|   |             |             |             |
|---|-------------|-------------|-------------|
| C | 0.91186027  | -0.16518888 | -0.10800742 |
| C | -0.29857903 | 0.74649324  | 0.36155383  |
| C | -1.49757362 | -0.18640089 | 0.55298914  |
| C | -1.46329157 | -0.62406113 | -0.71546275 |
| C | -0.29233059 | 0.29515860  | -1.06627867 |
| C | 2.22513643  | 0.15146091  | -0.59792023 |
| C | 2.70107539  | 1.55098577  | -0.70601462 |
| H | 0.78923546  | -1.20607393 | 0.19361430  |
| C | -0.20298221 | 2.12066348  | 0.97058630  |
| H | -2.05405240 | -0.47714371 | 1.44023139  |
| H | -1.95582561 | -1.41485073 | -1.27263668 |
| C | -0.17289266 | 1.06968877  | -2.34808873 |
| H | 3.31016221  | 1.64377701  | 0.21484850  |

|   |             |            |             |
|---|-------------|------------|-------------|
| H | 2.00245619  | 2.40265972 | -0.70603939 |
| H | 3.41850227  | 1.67367785 | -1.52723230 |
| H | 0.11161167  | 2.06201282 | 2.01983403  |
| H | -1.18590921 | 2.60725372 | 0.94554196  |
| H | 0.50296608  | 2.77108436 | 0.45175288  |
| H | 0.04920065  | 0.40530368 | -3.19121588 |
| H | 0.60082704  | 1.83942548 | -2.30995213 |
| H | -1.13145862 | 1.56195212 | -2.55341554 |

int5crbhhh\_12

E [Hartrees] = -349.9791225422

|   |             |             |             |
|---|-------------|-------------|-------------|
| C | 0.84706876  | -0.17047541 | 0.36867817  |
| C | -0.40428943 | 0.70230239  | 0.62606080  |
| C | -1.65642294 | -0.19024825 | 0.61982719  |
| C | -1.42579607 | -0.61679145 | -0.63704585 |
| C | -0.17238430 | 0.25473636  | -0.76718154 |
| C | 2.08358776  | 0.53126093  | 0.15738862  |
| C | 3.27881534  | -0.33170945 | 0.34392854  |
| H | 0.78283510  | -1.22571737 | 0.67553823  |
| H | -0.29074205 | 1.71035872  | 1.00829950  |
| C | -2.61360560 | -0.54408330 | 1.70420133  |
| C | -2.00411023 | -1.65052087 | -1.53966356 |
| H | 0.16060360  | 0.85726666  | -1.60321757 |
| H | -1.25663170 | -2.41505045 | -1.79276175 |
| H | -2.34633521 | -1.21442175 | -2.48767134 |
| H | -2.85954366 | -2.14997708 | -1.07131744 |
| H | 4.12136091  | -0.04204663 | -0.29604840 |
| H | 3.14106689  | -1.42934577 | 0.31936813  |
| H | 3.60146544  | -0.07255759 | 1.37144066  |
| H | -3.18340681 | 0.33218919  | 2.04111063  |
| H | -2.08248538 | -0.93403107 | 2.58369407  |
| H | -3.32949089 | -1.30317959 | 1.36981938  |

int5crbhhme\_12

E [Hartrees] = -349.9768035864

|   |             |             |             |
|---|-------------|-------------|-------------|
| C | 0.86689269  | -0.33879039 | -0.02811769 |
| C | -0.26740216 | 0.61608225  | 0.44211710  |
| C | -1.56465515 | -0.21659479 | 0.55792248  |
| C | -1.53578511 | -0.55788000 | -0.74193876 |
| C | -0.26305357 | 0.24050990  | -0.99491938 |
| C | 2.11150239  | 0.24459511  | -0.43294371 |
| C | 3.19473808  | -0.75717170 | -0.60978924 |
| H | 0.74527369  | -1.40608164 | 0.21028833  |
| C | -0.01223203 | 1.95698431  | 1.07121559  |

|   |             |             |             |
|---|-------------|-------------|-------------|
| C | -2.38911717 | -0.56466891 | 1.74635657  |
| H | -2.09739058 | -1.25269447 | -1.35867734 |
| H | 0.00014472  | 0.86786261  | -1.83763239 |
| H | 3.77855294  | -0.65181304 | 0.32509487  |
| H | 3.89646102  | -0.48937950 | -1.40934013 |
| H | 2.91082319  | -1.82307069 | -0.69447936 |
| H | 0.08755586  | 1.86902066  | 2.16086208  |
| H | -0.84260309 | 2.64310104  | 0.86344064  |
| H | 0.91073537  | 2.38294840  | 0.67067006  |
| H | -2.79554481 | 0.33596527  | 2.22562099  |
| H | -1.78161673 | -1.07787589 | 2.50483335  |
| H | -3.22673260 | -1.21593842 | 1.47531362  |

int5crbhmeme\_12

E [Hartrees] = -349.9730527746

Gcorr [kcal/mol] = 91.834

|   |             |             |             |
|---|-------------|-------------|-------------|
| C | 0.86872313  | -0.35468692 | -0.26409397 |
| C | -0.22232922 | 0.60883551  | 0.35449053  |
| C | -1.49687802 | -0.22804575 | 0.52824218  |
| C | -1.57399792 | -0.50036478 | -0.78247139 |
| C | -0.31168592 | 0.31016341  | -1.09886024 |
| C | 2.17050672  | 0.20707440  | -0.48100788 |
| C | 3.30135945  | -0.74505506 | -0.34053811 |
| H | 0.72524119  | -1.42161480 | -0.04314646 |
| C | 0.10828968  | 1.89705014  | 1.05325964  |
| H | -2.02599823 | -0.57058997 | 1.41304056  |
| H | -2.18969359 | -1.15434086 | -1.39339558 |
| C | -0.09171951 | 1.20610645  | -2.28401885 |
| H | 3.69130625  | -0.57120850 | 0.67951678  |
| H | 4.13757306  | -0.50338553 | -1.00889211 |
| H | 3.06245884  | -1.82198731 | -0.41402785 |
| H | 0.31621593  | 1.72714300  | 2.11740450  |
| H | -0.73909392 | 2.59037060  | 0.98396912  |
| H | 0.98838157  | 2.36140921  | 0.60251158  |
| H | 0.81984588  | 1.79406715  | -2.15562864 |
| H | -0.94500219 | 1.88572019  | -2.40131834 |
| H | 0.00203496  | 0.62320020  | -3.20898971 |

int6hh\_124

E [Hartrees] = -350.0966135498

Gcorr [kcal/mol] = 93.856

|   |             |             |             |
|---|-------------|-------------|-------------|
| C | -1.30234622 | 1.24772937  | -0.26580002 |
| C | -1.29603871 | -0.09285709 | -0.35482002 |
| C | -0.00283479 | -0.26365844 | 0.44356765  |

|   |             |             |             |
|---|-------------|-------------|-------------|
| C | -0.00746078 | 1.30028393  | 0.55921968  |
| C | 1.31964078  | -0.09076648 | -0.31293089 |
| C | 1.31594106  | 1.25159305  | -0.21130794 |
| H | -1.93064105 | -0.80525622 | -0.87682025 |
| H | -0.01511481 | -0.89502311 | 1.33781602  |
| C | 2.18919104  | -1.09204274 | -0.99333861 |
| C | -2.15352221 | 2.34418410  | -0.81001699 |
| H | -0.03189577 | 1.79794211  | 1.53468348  |
| C | 2.18612957  | 2.34757414  | -0.72758177 |
| H | 1.62331228  | -1.64167306 | -1.75905589 |
| H | 2.57344107  | -1.83957792 | -0.28609770 |
| H | 3.04752950  | -0.61684136 | -1.48225986 |
| H | 2.56096924  | 2.98184828  | 0.08716914  |
| H | 1.62881217  | 3.00493212  | -1.40977941 |
| H | 3.05115799  | 1.95178250  | -1.27224315 |
| H | -1.56894031 | 3.00012678  | -1.47022546 |
| H | -2.54993809 | 2.97872292  | -0.00588482 |
| H | -3.00050172 | 1.95118954  | -1.38322106 |

int6hme\_123

E [Hartrees] = -350.0930048154

|   |             |             |             |
|---|-------------|-------------|-------------|
| C | -1.29710096 | 1.25330344  | -0.21160151 |
| C | -1.29731678 | -0.08693951 | -0.28067248 |
| C | 0.02200698  | -0.23217552 | 0.50109191  |
| C | 0.02524737  | 1.34096902  | 0.55308077  |
| C | 1.31175127  | -0.09074263 | -0.32920805 |
| C | 1.31792511  | 1.24949265  | -0.26032758 |
| C | -2.16649820 | -1.12436715 | -0.90575929 |
| C | 0.04393879  | -1.09788498 | 1.74688075  |
| C | 2.15402261  | -1.13059286 | -0.98627718 |
| H | -1.95433834 | 2.01808154  | -0.61865216 |
| H | 0.04392655  | 1.86563187  | 1.51353731  |
| H | 1.96169810  | 2.01236545  | -0.69173241 |
| H | -2.50802771 | -1.85762564 | -0.16248135 |
| H | -1.61546987 | -1.68651695 | -1.67282926 |
| H | -3.04977513 | -0.68090735 | -1.37823032 |
| H | 0.94491777  | -0.90663782 | 2.34164355  |
| H | 0.03695905  | -2.16432831 | 1.48460586  |
| H | -0.83318403 | -0.90348347 | 2.37539930  |
| H | 1.57164798  | -1.69444750 | -1.72850336 |
| H | 2.52528609  | -1.86222852 | -0.25570272 |
| H | 3.01758521  | -0.68913355 | -1.49564795 |

int6hme\_124



E [Hartrees] = -350.0930198970

|   |             |             |             |
|---|-------------|-------------|-------------|
| C | -1.28951780 | 1.26058914  | -0.20073476 |
| C | -1.29993597 | -0.07982561 | -0.26837000 |
| C | 0.01611903  | -0.23631610 | 0.51982451  |
| C | 0.03202211  | 1.33745098  | 0.56329409  |
| C | 1.30322506  | -0.10357509 | -0.30262727 |
| C | 1.32425969  | 1.23803379  | -0.26161806 |
| C | -2.16777013 | -1.11152622 | -0.90204847 |
| C | 0.01352625  | -1.09001565 | 1.77422249  |
| H | 1.92807450  | -0.84389749 | -0.79794195 |
| H | -1.93851382 | 2.03074706  | -0.61083661 |
| H | 0.06387605  | 1.87200154  | 1.51856548  |
| C | 2.17947828  | 2.30682464  | -0.85013754 |
| H | -2.53126183 | -1.83646732 | -0.16097898 |
| H | -1.60309463 | -1.68346756 | -1.65212767 |
| H | -3.03662678 | -0.66379708 | -1.39675169 |
| H | 0.91205632  | -0.90678667 | 2.37459409  |
| H | -0.00645777 | -2.15831030 | 1.52115521  |
| H | -0.86703045 | -0.87680142 | 2.39217691  |
| H | 3.01856607  | 1.88881327  | -1.41707822 |
| H | 2.58643666  | 2.96685754  | -0.07229376 |
| H | 1.59038461  | 2.94234201  | -1.52657659 |

int6meme\_124

E [Hartrees] = -350.0887174514

Gcorr [kcal/mol] = 94.308

|   |             |             |             |
|---|-------------|-------------|-------------|
| C | -1.32522931 | 1.20284713  | -0.17487051 |
| C | -1.29437278 | -0.13515204 | -0.21944881 |
| C | 0.04449819  | -0.25162566 | 0.52064359  |
| C | 0.00764599  | 1.33315624  | 0.57794108  |
| C | 1.30442997  | -0.07158943 | -0.34596820 |
| C | 1.27189584  | 1.26782134  | -0.28654774 |
| H | -1.94365178 | -0.88756595 | -0.66128358 |
| C | 0.13387030  | -1.11169677 | 1.76744537  |
| C | 2.15495974  | -1.09017026 | -1.02360636 |
| H | -2.00869956 | 1.95166848  | -0.56865341 |
| C | 0.04073004  | 2.09850443  | 1.88793798  |
| H | 1.88043862  | 2.04810534  | -0.73893627 |
| H | 1.04733029  | -0.89018146 | 2.33222302  |
| H | 0.15238820  | -2.17801791 | 1.50709815  |
| H | -0.72734656 | -0.94422115 | 2.42442276  |
| H | 1.55978525  | -1.67861848 | -1.73641623 |
| H | 2.57638263  | -1.80272230 | -0.30154748 |
| H | 2.98390125  | -0.62774884 | -1.57037066 |

|   |             |            |            |
|---|-------------|------------|------------|
| H | 0.95955663  | 1.88171766 | 2.44512362 |
| H | -0.81734027 | 1.83804551 | 2.51868822 |
| H | 0.00680531  | 3.18089063 | 1.70868027 |

int7hh\_124

E [Hartrees] = -350.0516012745

Gcorr [kcal/mol] = 93.731

|   |             |             |             |
|---|-------------|-------------|-------------|
| C | -1.33722745 | 1.44681564  | -0.25689534 |
| C | -1.16985911 | 0.02752440  | -0.71547212 |
| C | -0.19432946 | -0.56218394 | 0.02102366  |
| C | -0.07700790 | 1.97551121  | -0.26018573 |
| C | 1.15820467  | -0.19174674 | -0.51292084 |
| C | 1.17548763  | 1.18285628  | -0.53404837 |
| H | -1.06449340 | -0.04247708 | -1.80694179 |
| H | -0.26589125 | -0.42530573 | 1.10878147  |
| C | 2.30471774  | -1.13909028 | -0.69518798 |
| C | -2.61158618 | 2.22122418  | -0.12650314 |
| H | 0.05444825  | 3.05333611  | -0.14178477 |
| C | 2.41451058  | 2.01844883  | -0.75715908 |
| H | 2.06164446  | -1.89039147 | -1.45763890 |
| H | 2.49178924  | -1.69262552 | 0.23600577  |
| H | 3.23541977  | -0.64765050 | -0.99192988 |
| H | 2.62222060  | 2.64856283  | 0.11847593  |
| H | 2.27425188  | 2.69910986  | -1.60770030 |
| H | 3.30442442  | 1.41727967  | -0.95413737 |
| H | -2.42743967 | 3.28589323  | 0.05556266  |
| H | -3.22550880 | 1.83185940  | 0.69599811  |
| H | -3.21596931 | 2.12364719  | -1.03920652 |

int7hme\_123

E [Hartrees] = -350.0485123808

Gcorr [kcal/mol] = 93.591

|   |             |             |             |
|---|-------------|-------------|-------------|
| C | -1.07747896 | 1.08949310  | -0.83625678 |
| C | -1.34293897 | -0.16246955 | -0.06239665 |
| C | -0.11322984 | -0.76693254 | 0.02574610  |
| C | -0.21963528 | 1.91491679  | -0.16924253 |
| C | 1.14238894  | 0.02103083  | -0.32138303 |
| C | 1.13652401  | 1.39602993  | -0.42080584 |
| C | -2.68241717 | -0.67078429 | 0.37220929  |
| C | 0.07752549  | -2.19051800 | 0.50003790  |
| C | 2.44914704  | -0.73173903 | -0.39341861 |
| H | -0.76061018 | 0.86627628  | -1.86284874 |
| H | -0.43405866 | 2.19820429  | 0.86896233  |
| H | 2.07071969  | 1.95881106  | -0.39240939 |

|   |             |             |             |
|---|-------------|-------------|-------------|
| H | -3.20364103 | 0.09899209  | 0.95576109  |
| H | -2.62475566 | -1.57543427 | 0.98386260  |
| H | -3.31924725 | -0.88387611 | -0.49791708 |
| H | 0.69161203  | -2.23710101 | 1.40943334  |
| H | 0.58648454  | -2.80086428 | -0.25664387 |
| H | -0.87531881 | -2.67641584 | 0.72008499  |
| H | 2.42437866  | -1.48808207 | -1.18939512 |
| H | 2.67175645  | -1.26499788 | 0.53883830  |
| H | 3.28125414  | -0.05344940 | -0.60382380 |

int7hme\_124

E [Hartrees] = -350.0513473386

Gcorr [kcal/mol] = 92.345

|   |             |             |             |
|---|-------------|-------------|-------------|
| C | -1.06735792 | 1.10403159  | -0.15284108 |
| C | -1.04804797 | -0.24783764 | -0.33649065 |
| C | 0.26379312  | -0.78680734 | 0.14784887  |
| C | 0.10437057  | 1.88643839  | 0.35290654  |
| C | 1.28863052  | 0.01240215  | -0.37684182 |
| C | 1.34392490  | 1.32510061  | 0.34169934  |
| C | -2.24455110 | -1.08428507 | -0.68155468 |
| C | 0.30359339  | -1.32516139 | 1.55892631  |
| H | 1.21615017  | 0.16836128  | -1.46332599 |
| H | -1.99931827 | 1.65347291  | -0.29500779 |
| C | -0.16179467 | 3.29020241  | 0.83278297  |
| H | 2.23367703  | 1.86803096  | 0.65598071  |
| H | -2.44975903 | -1.80886274 | 0.11903782  |
| H | -2.06709930 | -1.66927581 | -1.59328869 |
| H | -3.14255424 | -0.47520179 | -0.83258047 |
| H | 1.32373974  | -1.30843876 | 1.95469954  |
| H | -0.04222757 | -2.36845606 | 1.57955399  |
| H | -0.34992906 | -0.75956541 | 2.23837386  |
| H | -0.89884346 | 3.29701433  | 1.64751858  |
| H | -0.57503560 | 3.91328449  | 0.02794362  |
| H | 0.75239297  | 3.76925514  | 1.19696781  |

int7meme\_124

E [Hartrees] = -350.0513312807

Gcorr [kcal/mol] = 92.250

|   |             |             |             |
|---|-------------|-------------|-------------|
| C | -1.06838740 | 1.10324729  | -0.14445435 |
| C | -1.05907852 | -0.24789462 | -0.33677316 |
| C | 0.25087726  | -0.78594650 | 0.15575853  |
| C | 0.11236346  | 1.87906464  | 0.35562049  |
| C | 1.27388947  | -0.00249200 | -0.37973703 |
| C | 1.34936341  | 1.31109659  | 0.33677341  |

|   |             |             |             |
|---|-------------|-------------|-------------|
| C | -2.25831760 | -1.07570677 | -0.69057068 |
| C | 0.30118538  | -1.31632681 | 1.56857273  |
| H | 1.18286715  | 0.15973122  | -1.46396649 |
| H | -1.99736211 | 1.65957914  | -0.28045391 |
| C | -0.14269198 | 3.28581337  | 0.83293784  |
| H | 2.24475877  | 1.85228995  | 0.63802104  |
| H | -2.47093487 | -1.80199076 | 0.10665119  |
| H | -2.07897875 | -1.65871432 | -1.60322439 |
| H | -3.15211740 | -0.46122676 | -0.84484743 |
| H | 1.27622197  | -1.11427065 | 2.02483710  |
| H | 0.16290337  | -2.40754866 | 1.56974197  |
| H | -0.48737946 | -0.89341198 | 2.20524721  |
| H | -0.86981729 | 3.29829871  | 1.65648050  |
| H | -0.56323763 | 3.90773214  | 0.03101276  |
| H | 0.77762696  | 3.76237903  | 1.18468146  |

propgyl

E [Hartrees] = -116.6545140176

Gcorr [kcal/mol] = 20.084

|   |             |             |             |
|---|-------------|-------------|-------------|
| H | -1.12546150 | -0.00000278 | 0.00017423  |
| C | -0.05923979 | 0.00000275  | 0.00007809  |
| C | 1.14788250  | 0.00000113  | -0.00002367 |
| C | 2.60835984  | -0.00000005 | -0.00004056 |
| H | 3.00459121  | -0.00000062 | 1.02260168  |
| H | 3.00463308  | -0.88561724 | -0.51134515 |
| H | 3.00463465  | 0.88561681  | -0.51134462 |

ts1b\_14zez

E [Hartrees] = -233.2646319663

Gcorr [kcal/mol] = 51.887

|   |             |             |             |
|---|-------------|-------------|-------------|
| H | -2.26885628 | -2.63550461 | -2.41233503 |
| C | -1.81285084 | -2.41536352 | -1.45950230 |
| C | -1.28679230 | -1.41450212 | -0.90173523 |
| C | -0.63384940 | -0.82962129 | 0.26653155  |
| H | -1.20852690 | 0.01035414  | 0.67612681  |
| H | -0.52814054 | -1.58184791 | 1.07052713  |
| H | 0.37123073  | -0.45986956 | 0.02846704  |
| C | -1.87085562 | -3.96580560 | -0.47722206 |
| H | -1.41457826 | -3.74583162 | 0.47551394  |
| C | -2.39728112 | -4.96655700 | -1.03489254 |
| C | -3.05066469 | -5.55099875 | -2.20315842 |
| H | -3.15507679 | -4.79894680 | -3.00750353 |
| H | -2.47703769 | -6.39192798 | -2.61227810 |
| H | -4.05632423 | -5.91925847 | -1.96522239 |

ts1c

E [Hartrees] = -233.2337390267

Gcorr [kcal/mol] = 52.862

|   |             |             |             |
|---|-------------|-------------|-------------|
| C | -1.84404367 | 1.41714980  | -0.29106545 |
| C | -1.02747514 | 0.51041964  | 0.04694576  |
| C | 0.10607294  | 3.00273941  | -0.63352919 |
| C | -0.91125696 | 2.60541163  | 0.13279901  |
| C | 0.21266266  | -0.20000105 | 0.28978680  |
| C | 0.71730819  | 4.35599940  | -0.45733666 |
| H | -2.85472001 | 1.51360208  | -0.66722556 |
| H | -1.17588648 | 2.93391855  | 1.14457157  |
| H | 0.43660819  | -0.28627355 | 1.35981544  |
| H | 1.01636754  | 0.36103792  | -0.21470128 |
| H | 0.17515727  | -1.21238190 | -0.13454059 |
| H | 0.41557097  | 4.92122479  | 0.44479077  |
| H | 0.43699000  | 4.96728030  | -1.32873757 |
| H | 1.81390201  | 4.30129347  | -0.48665568 |

ts2b\_14eee\_eze

E [Hartrees] = -233.2639493271

Gcorr [kcal/mol] = 53.237

|   |             |             |             |
|---|-------------|-------------|-------------|
| H | -2.57929405 | -2.55970275 | -2.13485692 |
| C | -1.76339461 | -2.62897680 | -1.39948452 |
| C | -0.74148026 | -1.80983129 | -1.50405259 |
| C | -0.26900897 | -0.70828008 | -2.35977098 |
| H | 0.69418408  | -0.94667983 | -2.82924458 |
| H | -0.99100356 | -0.49574923 | -3.16708630 |
| H | -0.13154782 | 0.21659517  | -1.78490492 |
| C | -1.91252879 | -3.69874834 | -0.35719427 |
| H | -1.43169609 | -4.66172352 | -0.58692050 |
| C | -2.58056680 | -3.57328232 | 0.76719093  |
| C | -2.93835478 | -4.36696435 | 1.95498062  |
| H | -2.51826374 | -5.38571793 | 1.89250715  |
| H | -2.55754277 | -3.90648200 | 2.87567234  |
| H | -4.02649823 | -4.46212007 | 2.06383336  |

ts2b\_14eez\_eee

E [Hartrees] = -233.2665478795

Gcorr [kcal/mol] = 53.103

|   |             |             |             |
|---|-------------|-------------|-------------|
| H | -2.25524855 | -2.60275786 | -2.36155545 |
| C | -1.81952404 | -2.56844444 | -1.35415175 |
| C | -1.29766829 | -1.43357998 | -0.91951239 |
| C | -1.08034054 | -0.05295019 | -1.37829948 |

|   |             |             |             |
|---|-------------|-------------|-------------|
| H | -0.01337571 | 0.20691157  | -1.39206170 |
| H | -1.47069287 | 0.08975222  | -2.40083246 |
| H | -1.58330154 | 0.67483217  | -0.72754176 |
| C | -1.87065941 | -3.82952059 | -0.58428331 |
| H | -1.42742032 | -3.76374297 | 0.41895342  |
| C | -2.38571534 | -4.96071422 | -1.00629734 |
| C | -2.96829484 | -6.19342210 | -1.50569478 |
| H | -2.96792303 | -7.00560317 | -0.75698862 |
| H | -4.01472855 | -6.05081648 | -1.81543036 |
| H | -2.41917122 | -6.57027528 | -2.38112973 |

ts2b\_14zez\_eez

E [Hartrees] = -233.2698790833

Gcorr [kcal/mol] = 53.061

|   |             |             |             |
|---|-------------|-------------|-------------|
| H | -2.23890419 | -2.62459371 | -2.34679457 |
| C | -1.80421855 | -2.55360106 | -1.34003335 |
| C | -1.29177814 | -1.44065835 | -0.89874829 |
| C | -0.73482078 | -0.17282082 | -0.46270399 |
| H | 0.33171138  | -0.26648910 | -0.21117883 |
| H | -0.81265362 | 0.61497595  | -1.23300387 |
| H | -1.24904923 | 0.20649440  | 0.43237488  |
| C | -1.86467905 | -3.84102392 | -0.55481856 |
| H | -1.44127328 | -3.79844107 | 0.44663265  |
| C | -2.38899245 | -4.95717296 | -1.02483554 |
| C | -3.03598992 | -5.43529255 | -2.25600713 |
| H | -2.47742492 | -6.26257126 | -2.71317879 |
| H | -4.05602085 | -5.79399303 | -2.06558178 |
| H | -3.10385652 | -4.62644598 | -3.00658163 |

ts2c\_12

E [Hartrees] = -233.2479038800

|   |             |             |             |
|---|-------------|-------------|-------------|
| C | -1.97033456 | 1.30463068  | -0.28549507 |
| C | -0.75080141 | 0.97182786  | -0.06239850 |
| C | -0.14662030 | 2.99114615  | -0.84330808 |
| C | -1.15734025 | 2.54451673  | 0.04060782  |
| C | 0.37327306  | 0.08236245  | 0.27919019  |
| C | 0.78483819  | 3.98685309  | -0.20969121 |
| H | -2.99942737 | 1.01577689  | -0.42842142 |
| H | -1.33608031 | 2.97911397  | 1.04134673  |
| H | 0.71502339  | 0.28118593  | 1.30275973  |
| H | 1.21686396  | 0.25195495  | -0.39742197 |
| H | 0.06488565  | -0.96705182 | 0.21276315  |
| H | 0.53307994  | 4.37641793  | 0.79635266  |
| H | 0.89219000  | 4.83656324  | -0.89979101 |

H 1.79190410 3.54537585 -0.16296846

ts2c\_13

E [Hartrees] = -233.2463994817

|   |             |             |             |
|---|-------------|-------------|-------------|
| C | 0.82355501  | 0.93046953  | 0.11080559  |
| C | -0.40640491 | 1.23456402  | -0.11134826 |
| C | -0.99771786 | -0.76063399 | 0.68521961  |
| C | 0.00627355  | -0.30994696 | -0.21447910 |
| H | -1.21793392 | 1.89652541  | -0.36401855 |
| C | -1.93463748 | -1.75689397 | 0.05909784  |
| C | 2.23778274  | 1.29205394  | 0.33469715  |
| H | 0.18735278  | -0.75085326 | -1.21176752 |
| H | -1.79264239 | -2.02229383 | -1.00627718 |
| H | -1.82904952 | -2.67639972 | 0.65760954  |
| H | -2.97839977 | -1.45032679 | 0.21020707  |
| H | 2.86793194  | 0.87092636  | -0.45839750 |
| H | 2.37703267  | 2.37713355  | 0.35663322  |
| H | 2.58818970  | 0.86892441  | 1.28456660  |

ts3b\_14eze

E [Hartrees] = -233.2686878936

Gcorr [kcal/mol] = 52.051

|   |             |             |             |
|---|-------------|-------------|-------------|
| H | -1.68958932 | -3.29865503 | -2.80358512 |
| C | -1.68166269 | -3.04237038 | -1.73769597 |
| C | -1.17063607 | -1.90664283 | -1.27234484 |
| C | -0.51088000 | -0.68207011 | -1.74446939 |
| H | 0.49062156  | -0.56381540 | -1.30880431 |
| H | -0.39659026 | -0.70023628 | -2.84223930 |
| H | -1.08613982 | 0.21737101  | -1.48591334 |
| C | -2.23757906 | -3.93370844 | -0.71909617 |
| H | -2.68796481 | -4.90031942 | -0.97344267 |
| C | -2.15395275 | -3.48259086 | 0.52873793  |
| C | -2.50134667 | -3.87263376 | 1.90167457  |
| H | -2.99323118 | -4.86077814 | 1.91264803  |
| H | -1.61326196 | -3.93722181 | 2.54501706  |
| H | -3.18939808 | -3.15465695 | 2.36844287  |

ts4bcrbhh\_12

E [Hartrees] = -349.9684759147

Gcorr [kcal/mol] = 90.582

|   |             |             |             |
|---|-------------|-------------|-------------|
| C | 0.97296774  | -0.13889964 | 0.13485302  |
| C | -0.30033468 | 0.69230525  | 0.28674909  |
| C | -1.51803486 | -0.22527746 | 0.52443307  |
| C | -1.50883093 | -0.63890701 | -0.77543350 |

|   |             |             |             |
|---|-------------|-------------|-------------|
| C | -0.36213500 | 0.23096216  | -1.11594047 |
| C | 2.23686704  | 0.42345098  | 0.03189548  |
| C | 2.54120097  | 1.70645472  | -0.65396523 |
| H | 0.86046427  | -1.18538405 | 0.41903240  |
| H | -0.22603443 | 1.72578982  | 0.62071951  |
| C | -2.23139976 | -0.62745388 | 1.76633268  |
| C | -2.23828339 | -1.69035319 | -1.54336989 |
| H | 0.00151643  | 0.68876666  | -2.02692272 |
| H | -1.54565006 | -2.45982211 | -1.90951963 |
| H | -2.74501915 | -1.27062995 | -2.42203623 |
| H | -2.99457636 | -2.18121274 | -0.92118345 |
| H | 3.31675834  | 2.27778967  | -0.12765233 |
| H | 1.67473690  | 2.37031076  | -0.82206136 |
| H | 2.95946439  | 1.47539515  | -1.64709501 |
| H | -2.77206402 | 0.21735841  | 2.21553118  |
| H | -1.52964802 | -0.99372781 | 2.52860249  |
| H | -2.95951526 | -1.42110518 | 1.56405377  |

ts4bhh\_12

E [Hartrees] = -349.9676328141

Gcorr [kcal/mol] = 87.053

|   |             |             |             |
|---|-------------|-------------|-------------|
| C | 1.33596122  | -0.23491403 | 0.05066253  |
| C | -0.58265835 | 0.70575053  | -0.21129782 |
| C | -1.47450049 | -0.31951249 | 0.47787614  |
| C | -1.95173036 | -0.74206180 | -0.75898163 |
| C | -1.16217448 | 0.28379727  | -1.45149599 |
| C | 2.26066298  | 0.43893760  | 0.52732260  |
| C | 3.03490250  | 1.56109069  | 1.04837693  |
| H | 1.01018537  | -1.20261955 | -0.28458872 |
| H | -0.29806082 | 1.70194000  | 0.11191280  |
| C | -1.63624284 | -0.73826977 | 1.89209822  |
| C | -2.87691260 | -1.82061630 | -1.20772437 |
| H | -1.06232540 | 0.60207995  | -2.48236798 |
| H | 3.91803197  | 1.75849905  | 0.42741554  |
| H | 3.38761255  | 1.36791546  | 2.06948355  |
| H | 2.43701534  | 2.48569344  | 1.07350624  |
| H | -3.74659502 | -1.40964921 | -1.73898848 |
| H | -3.24808563 | -2.40262568 | -0.35698017 |
| H | -2.38082177 | -2.51286651 | -1.90211145 |
| H | -0.66294361 | -0.98244119 | 2.34093408  |
| H | -2.28623304 | -1.61661333 | 1.97726780  |
| H | -2.07304791 | 0.06315369  | 2.50669494  |

ts4bhme\_12



E [Hartrees] = -349.9669509023

Gcorr [kcal/mol] = 87.168

|   |             |             |             |
|---|-------------|-------------|-------------|
| C | 1.12536341  | -0.48993977 | -0.77364710 |
| C | -0.62053972 | 0.73739954  | -0.52688806 |
| C | -1.23575115 | 0.02618970  | 0.66852604  |
| C | -2.16243205 | -0.59036336 | -0.17723805 |
| C | -1.65139399 | 0.10827174  | -1.33485166 |
| C | 2.23905131  | 0.04367842  | -0.88962042 |
| C | 3.34982287  | 0.98000845  | -1.02954253 |
| H | 0.59295391  | -1.42181143 | -0.70208160 |
| C | -0.08028499 | 2.13118138  | -0.60276775 |
| C | -0.87488705 | -0.02246109 | 2.10688594  |
| H | -2.93858291 | -1.33373521 | -0.02306424 |
| H | -1.92120106 | 0.15769800  | -2.38280824 |
| H | 0.73349868  | 2.27546470  | 0.11608275  |
| H | -0.86377719 | 2.87059533  | -0.38236436 |
| H | 0.31039780  | 2.34252614  | -1.60445539 |
| H | 0.17544605  | -0.32143664 | 2.23519776  |
| H | -1.50498480 | -0.73153777 | 2.65469943  |
| H | -0.98028085 | 0.96251209  | 2.58588610  |
| H | 3.97096195  | 0.73132201  | -1.90006862 |
| H | 4.00125973  | 0.96127360  | -0.14648200 |
| H | 2.99976728  | 2.01424184  | -1.16192411 |

ts4bmeh\_12

E [Hartrees] = -349.9632159238

Gcorr [kcal/mol] = 87.301

|   |             |             |             |
|---|-------------|-------------|-------------|
| C | 1.48119467  | -0.37331361 | -0.08758226 |
| C | -0.40228816 | 0.68549842  | -0.21201763 |
| C | -1.35769430 | -0.14609498 | 0.61371374  |
| C | -2.02437215 | -0.55621616 | -0.53551553 |
| C | -1.15974557 | 0.28781526  | -1.37499828 |
| C | 2.29174364  | 0.23818782  | 0.63620410  |
| H | 2.58670496  | 1.06771047  | 1.24644613  |
| C | 1.23960397  | -1.58395765 | -0.90498823 |
| H | 0.00288258  | 1.66695887  | 0.00920217  |
| H | -1.42788533 | -0.38910445 | 1.66722796  |
| C | -3.14852137 | -1.48760282 | -0.83504388 |
| C | -1.08958913 | 0.59541931  | -2.82677612 |
| H | 2.04124963  | -2.31355854 | -0.74979831 |
| H | 1.19934544  | -1.33334224 | -1.97143814 |
| H | 0.28353590  | -2.04891816 | -0.64158848 |
| H | -3.54151463 | -1.94305805 | 0.07976805  |
| H | -2.82960690 | -2.29576897 | -1.50830344 |

|   |             |             |             |
|---|-------------|-------------|-------------|
| H | -3.97630724 | -0.96851735 | -1.33779190 |
| H | -0.37890050 | 1.40575542  | -3.02173419 |
| H | -2.06861427 | 0.89712999  | -3.22555196 |
| H | -0.76796456 | -0.27603903 | -3.41929169 |

ts4bmeme\_12

E [Hartrees] = -349.9536069908

|   |             |             |             |
|---|-------------|-------------|-------------|
| C | 1.27176581  | -0.36137380 | -0.08487938 |
| C | -0.27455465 | 0.71437273  | -0.34875740 |
| C | -1.30436558 | -0.04396560 | 0.62153847  |
| C | -1.96213059 | -0.51549163 | -0.46248506 |
| C | -1.07696351 | 0.22732286  | -1.39378496 |
| C | 1.93922996  | -0.07473962 | 0.95203345  |
| H | 2.10823470  | 0.63996490  | 1.73756979  |
| C | 1.32219981  | -1.42691896 | -1.12841235 |
| C | 0.14935485  | 2.14835227  | -0.19325848 |
| C | -1.36706424 | -0.19569795 | 2.09239784  |
| H | -2.79441684 | -1.20000531 | -0.59842959 |
| H | -1.08094160 | 0.40297702  | -2.46464877 |
| H | 2.11188474  | -2.15070201 | -0.90247887 |
| H | 1.51531471  | -0.98546246 | -2.11339107 |
| H | 0.35867927  | -1.94732854 | -1.18657746 |
| H | 0.80869752  | 2.27231838  | 0.67445567  |
| H | -0.72821238 | 2.79404221  | -0.05888734 |
| H | 0.69392205  | 2.49279187  | -1.08051365 |
| H | -0.48633047 | -0.73639651 | 2.46547146  |
| H | -2.26712638 | -0.73931927 | 2.39976557  |
| H | -1.36676629 | 0.78522000  | 2.59014919  |

ts4concmehh\_12

E [Hartrees] = -349.9733603275

|   |             |             |             |
|---|-------------|-------------|-------------|
| C | 1.64463934  | 0.34386460  | -0.24694595 |
| C | -0.36777772 | 0.72202132  | -1.13669243 |
| C | -0.93797961 | 0.79743600  | 0.33116261  |
| C | -1.55825784 | -0.39448979 | 0.11557329  |
| C | -1.03417789 | -0.46441419 | -1.28698611 |
| C | 1.35173655  | 0.36611390  | 0.95129108  |
| C | 1.31321631  | 0.34915505  | 2.41567444  |
| H | 2.28988085  | 0.26360528  | -1.09788867 |
| H | -0.03150911 | 1.47921803  | -1.83626211 |
| H | -1.04785687 | 1.59526679  | 1.05584542  |
| C | -2.37759573 | -1.32618742 | 0.94011459  |
| C | -1.13667866 | -1.49000797 | -2.36026208 |
| H | -0.65598442 | -2.43437672 | -2.06386923 |

|   |             |             |             |
|---|-------------|-------------|-------------|
| H | -0.65829880 | -1.14484078 | -3.28337783 |
| H | -2.18447890 | -1.72930081 | -2.58952363 |
| H | -1.86742698 | -2.28957899 | 1.08300760  |
| H | -3.33935422 | -1.54809123 | 0.45746005  |
| H | -2.58452984 | -0.90219977 | 1.92883421  |
| H | 2.31263820  | 0.18568628  | 2.84440486  |
| H | 0.65173286  | -0.44416741 | 2.78354387  |
| H | 0.93384843  | 1.29835591  | 2.81348537  |

ts4concmehme\_12

E [Hartrees] = -349.9718301792

|   |             |             |             |
|---|-------------|-------------|-------------|
| C | 1.74188040  | 0.06896902  | -0.23601326 |
| C | -0.38719522 | 0.95738810  | -0.82172885 |
| C | -0.86671536 | 0.33420276  | 0.55940534  |
| C | -1.53380310 | -0.62135204 | -0.16905091 |
| C | -1.08802500 | -0.02311650 | -1.45420865 |
| C | 1.25623192  | -0.40970987 | 0.79120940  |
| H | 1.22026630  | -0.91219109 | 1.73580342  |
| C | 2.61705083  | 0.50400830  | -1.32870774 |
| H | 0.01094177  | 1.92303860  | -1.10991499 |
| C | -1.09371459 | 0.94568754  | 1.90056836  |
| C | -2.34543771 | -1.81822764 | 0.18381504  |
| H | -1.21485321 | -0.30801548 | -2.49482661 |
| H | -0.17858080 | 1.38072573  | 2.31812603  |
| H | -1.47367245 | 0.20035991  | 2.61000363  |
| H | -1.84098937 | 1.75195815  | 1.83488124  |
| H | -1.86585967 | -2.74783663 | -0.15614278 |
| H | -3.33799785 | -1.78418445 | -0.28661514 |
| H | -2.48920585 | -1.89126018 | 1.26765493  |
| H | 2.63078231  | 1.59761011  | -1.41336755 |
| H | 2.27135946  | 0.10824210  | -2.29092873 |
| H | 3.65251385  | 0.16961363  | -1.17266066 |

ts4concmemeh\_12

E [Hartrees] = -349.9728062000

Gcorr [kcal/mol] = 89.033

|   |             |             |             |
|---|-------------|-------------|-------------|
| C | 1.78356573  | 0.03047504  | -0.20627433 |
| C | -0.40620343 | 1.00067582  | -0.83076661 |
| C | -0.84416008 | 0.31774393  | 0.53546286  |
| C | -1.49700426 | -0.62471124 | -0.21395914 |
| C | -1.04169851 | -0.01191437 | -1.49093890 |
| C | 1.24298446  | -0.31215894 | 0.84835711  |
| H | 1.22476055  | -0.74100308 | 1.83028727  |
| C | 2.63433248  | 0.32622208  | -1.35805738 |

|   |             |             |             |
|---|-------------|-------------|-------------|
| C | 0.02577010  | 2.38204395  | -1.16708175 |
| H | -1.00348873 | 0.71193864  | 1.53335085  |
| H | -2.06006278 | -1.52152706 | 0.02533383  |
| C | -1.20408321 | -0.38025500 | -2.92570877 |
| H | 2.59214741  | 1.38859700  | -1.62688434 |
| H | 2.31623034  | -0.24600682 | -2.23795413 |
| H | 3.68665413  | 0.07917102  | -1.15581618 |
| H | 0.87834726  | 2.70616645  | -0.55855156 |
| H | -0.79000340 | 3.09956650  | -0.98431494 |
| H | 0.30403330  | 2.46326234  | -2.22495048 |
| H | -0.73152817 | 0.36118277  | -3.57973436 |
| H | -2.26466035 | -0.44876237 | -3.20435343 |
| H | -0.75572506 | -1.35994480 | -3.14384112 |

ts4concmeme\_12

E [Hartrees] = -349.9716120305

Gcorr [kcal/mol] = 89.263

|   |             |             |             |
|---|-------------|-------------|-------------|
| C | 1.77483709  | 0.03098843  | -0.23246207 |
| C | -0.38523395 | 1.01376755  | -0.82532377 |
| C | -0.84744232 | 0.34243791  | 0.55792304  |
| C | -1.48030959 | -0.61137335 | -0.20163191 |
| C | -1.02981322 | -0.00218264 | -1.46865157 |
| C | 1.24420187  | -0.34843887 | 0.81426391  |
| H | 1.21481062  | -0.78496279 | 1.79255105  |
| C | 2.64502893  | 0.35102010  | -1.36427864 |
| C | 0.05046479  | 2.39318236  | -1.16894009 |
| C | -1.12172840 | 0.93016990  | 1.90320885  |
| H | -2.05338710 | -1.50016922 | 0.04360257  |
| H | -1.13787927 | -0.27284651 | -2.51493450 |
| H | -0.24013530 | 1.42359236  | 2.32825457  |
| H | -1.45070117 | 0.15293902  | 2.60392433  |
| H | -1.92426219 | 1.68067550  | 1.84418426  |
| H | 2.63311461  | 1.42418361  | -1.58946675 |
| H | 2.31997932  | -0.17605255 | -2.26937694 |
| H | 3.68788481  | 0.06817539  | -1.16163471 |
| H | 0.88311173  | 2.73008723  | -0.54020711 |
| H | -0.77325686 | 3.10907955  | -1.02327700 |
| H | 0.35915389  | 2.45842534  | -2.21930751 |

ts5bcrbhhh\_12

E [Hartrees] = -349.9609597898

Gcorr [kcal/mol] = 90.477

|   |             |             |            |
|---|-------------|-------------|------------|
| C | 0.97690010  | -0.11549828 | 0.06908857 |
| C | -0.31679766 | 0.71475390  | 0.14984823 |

|   |             |             |             |
|---|-------------|-------------|-------------|
| C | -1.50532519 | -0.24130173 | 0.50371143  |
| C | -1.60348802 | -0.63409654 | -0.79571476 |
| C | -0.52937079 | 0.28262164  | -1.22073800 |
| C | 2.22923900  | 0.43662475  | 0.05021436  |
| C | 2.52157777  | 1.68326089  | -0.70933327 |
| H | 0.79963516  | -1.16000480 | 0.33949560  |
| H | -0.23993803 | 1.74531607  | 0.49441296  |
| C | -2.11960076 | -0.63204447 | 1.79783919  |
| C | -2.38892847 | -1.67737265 | -1.51785433 |
| H | -0.16235882 | 0.66140632  | -2.16544519 |
| H | -1.72378949 | -2.42110442 | -1.97564322 |
| H | -2.98952551 | -1.24113913 | -2.32634348 |
| H | -3.06916163 | -2.20036690 | -0.83719213 |
| H | 3.07950938  | 2.39343187  | -0.08395619 |
| H | 1.67664789  | 2.21177152  | -1.18877105 |
| H | 3.22654935  | 1.40863616  | -1.51046620 |
| H | -2.68102872 | 0.20118558  | 2.24493268  |
| H | -1.35591032 | -0.92576261 | 2.53027005  |
| H | -2.81321010 | -1.47048758 | 1.66850030  |

ts5bcrbhhme\_12

E [Hartrees] = -349.9591204964

Gcorr [kcal/mol] = 93.209

|   |             |             |             |
|---|-------------|-------------|-------------|
| C | 1.00155436  | -0.25842590 | -0.26527310 |
| C | -0.49489934 | 0.81740708  | 0.40812341  |
| C | -1.57813676 | -0.19423310 | 0.60465410  |
| C | -1.44793374 | -0.65965470 | -0.65833285 |
| C | -0.26819232 | 0.30807265  | -0.93731275 |
| C | 2.27990998  | 0.15954653  | -0.58665932 |
| C | 2.57993321  | 1.57693435  | -0.93035096 |
| H | 0.82387623  | -1.24088340 | 0.17717758  |
| C | -0.17757033 | 2.07711184  | 1.13337024  |
| C | -2.37647638 | -0.57073536 | 1.80616199  |
| H | -1.85017068 | -1.50421965 | -1.20751321 |
| H | -0.15092375 | 0.90107138  | -1.84303798 |
| H | 3.02266472  | 2.02050663  | -0.02120888 |
| H | 1.74451521  | 2.23758102  | -1.22976368 |
| H | 3.36680051  | 1.64510952  | -1.69228192 |
| H | -0.01020824 | 1.89717318  | 2.20241705  |
| H | -1.02425704 | 2.77667378  | 1.05238557  |
| H | 0.70564300  | 2.57383924  | 0.72929168  |
| H | -2.95342456 | 0.28187640  | 2.18738616  |
| H | -1.71983872 | -0.90275835 | 2.62128691  |
| H | -3.07605683 | -1.38110754 | 1.57762626  |

ts5bcrbhme<sub>h</sub>\_12

E [Hartrees] = -349.9581034803

Gcorr [kcal/mol] = 89.309

|   |             |             |             |
|---|-------------|-------------|-------------|
| C | 1.05059443  | -0.23577867 | -0.36568135 |
| C | -0.45268863 | 0.88370360  | 0.33487531  |
| C | -1.51581666 | -0.09697289 | 0.58654727  |
| C | -1.40123077 | -0.65095605 | -0.64706543 |
| C | -0.23283684 | 0.34923556  | -1.00294158 |
| C | 2.33210790  | 0.18381689  | -0.59718713 |
| C | 2.69980843  | 1.62049567  | -0.71030422 |
| H | 0.84737805  | -1.22459538 | 0.05805329  |
| H | -0.10202046 | 1.78607351  | 0.81783423  |
| H | -2.09205007 | -0.35455658 | 1.47051228  |
| C | -2.00440598 | -1.77548445 | -1.40464318 |
| C | -0.20111583 | 1.09721259  | -2.31315450 |
| H | 3.59320330  | 1.81530893  | -0.09920555 |
| H | 1.93967986  | 2.37892595  | -0.44811571 |
| H | 3.03650708  | 1.80356357  | -1.74316772 |
| H | 0.06503728  | 0.42346953  | -3.13599897 |
| H | 0.52178017  | 1.91764847  | -2.29978909 |
| H | -1.19106679 | 1.52086666  | -2.51852911 |
| H | -2.52123604 | -1.41492831 | -2.30604354 |
| H | -2.73302541 | -2.31823707 | -0.79283263 |
| H | -1.23989303 | -2.48640383 | -1.74520487 |

ts5bcrbhmem<sub>e</sub>\_12

E [Hartrees] = -349.9544022430

Gcorr [kcal/mol] = 90.946

|   |             |             |             |
|---|-------------|-------------|-------------|
| C | 1.00167208  | -0.22157480 | -0.32016136 |
| C | -0.42672341 | 0.84116199  | 0.37375342  |
| C | -1.50284944 | -0.15822506 | 0.61555914  |
| C | -1.42011511 | -0.66286768 | -0.63321895 |
| C | -0.28038749 | 0.33733827  | -0.99465751 |
| C | 2.29868873  | 0.16730271  | -0.60727361 |
| C | 2.73047001  | 1.58128518  | -0.69206034 |
| H | 0.81740843  | -1.22757920 | 0.06588584  |
| C | -0.09806395 | 2.14550582  | 1.02596284  |
| H | -2.05050509 | -0.44110357 | 1.51055039  |
| H | -1.83023960 | -1.52054717 | -1.15476574 |
| C | -0.26291589 | 1.12533783  | -2.27869114 |
| H | 3.20330070  | 1.78201549  | 0.28665412  |
| H | 1.97019425  | 2.37234065  | -0.82714274 |
| H | 3.53024988  | 1.72018472  | -1.43027257 |

|   |             |            |             |
|---|-------------|------------|-------------|
| H | 0.72132909  | 2.06866540 | 1.75085547  |
| H | -0.97731739 | 2.51182416 | 1.56975804  |
| H | 0.18665571  | 2.90741948 | 0.28997342  |
| H | 0.03739513  | 0.49192893 | -3.12082468 |
| H | 0.42463812  | 1.97474572 | -2.23315900 |
| H | -1.26863876 | 1.51223626 | -2.47936248 |

ts5bhhh\_12

E [Hartrees] = -350.0058022285

Gcorr [kcal/mol] = 87.691

|   |             |             |             |
|---|-------------|-------------|-------------|
| C | -2.44986448 | 0.26551827  | 0.42161560  |
| C | 0.60070380  | -1.63605642 | -0.92519174 |
| C | 1.53773796  | -0.59648966 | -0.88188370 |
| C | 0.82820298  | 0.11477652  | 0.09820977  |
| C | -0.26222183 | -0.96606003 | 0.15953346  |
| C | -1.67664949 | -0.57265777 | -0.23227722 |
| H | -2.05878368 | -1.01922891 | -1.16279860 |
| H | -0.27692841 | -1.52703988 | 1.10632573  |
| H | 0.94516666  | 1.06927011  | 0.59766501  |
| C | 2.82468324  | -0.35732065 | -1.60846231 |
| C | 0.44874528  | -2.90432449 | -1.68136463 |
| C | -3.79354991 | 0.86114769  | 0.32821797  |
| H | -4.41057821 | 0.61013975  | 1.20109442  |
| H | -4.32419547 | 0.49913812  | -0.56960249 |
| H | -3.74795148 | 1.95645039  | 0.26614550  |
| H | 2.84081876  | 0.63817412  | -2.06801327 |
| H | 2.97801003  | -1.09889821 | -2.40002940 |
| H | 3.68212161  | -0.41346345 | -0.92604245 |
| H | 0.48172569  | -3.78328464 | -1.01891838 |
| H | 1.24247634  | -3.02035295 | -2.42860929 |
| H | -0.51667870 | -2.95080979 | -2.20781659 |

ts5bhhme\_12

E [Hartrees] = -350.0075085535

Gcorr [kcal/mol] = 88.954

|   |             |             |             |
|---|-------------|-------------|-------------|
| C | -2.47899785 | -0.37743099 | -0.39309615 |
| C | 0.51222439  | -1.43510563 | -0.77979023 |
| C | 1.66402442  | -0.64979154 | -0.93624783 |
| C | 1.24709831  | 0.30060316  | 0.00497819  |
| C | -0.04765112 | -0.47723329 | 0.28541710  |
| C | -1.36324256 | 0.21302416  | -0.02422733 |
| H | -1.35819245 | 1.30914793  | 0.07257092  |
| H | -0.08541884 | -0.91918468 | 1.29356010  |
| H | 1.66715224  | 1.21478040  | 0.40961172  |

|   |             |             |             |
|---|-------------|-------------|-------------|
| C | 2.88837169  | -0.80227042 | -1.78423712 |
| C | -0.05973230 | -2.64954752 | -1.40542478 |
| C | -3.86679277 | -0.02882014 | -0.74449672 |
| H | -4.11959033 | -0.34546706 | -1.76471739 |
| H | -4.02636808 | 1.06185140  | -0.68542773 |
| H | -4.58808147 | -0.50525134 | -0.06751886 |
| H | 3.25745070  | 0.17077244  | -2.12694596 |
| H | 2.68529878  | -1.42114978 | -2.66550303 |
| H | 3.70139678  | -1.28297840 | -1.22464363 |
| H | -0.10504491 | -3.49647403 | -0.70287674 |
| H | 0.52377376  | -2.96947581 | -2.27685249 |
| H | -1.09463344 | -2.45866951 | -1.72787780 |

ts5bhpre\_12

E [Hartrees] = -349.9575453588

Gcorr [kcal/mol] = 87.858

|   |             |             |             |
|---|-------------|-------------|-------------|
| C | 1.19792082  | -0.21121853 | 0.07894970  |
| C | -0.17383443 | 0.44767247  | -0.08749596 |
| C | -1.27648609 | -0.42779897 | 0.51878845  |
| C | -1.75717205 | -0.75339842 | -0.75890637 |
| C | -0.82825098 | 0.06847965  | -1.41460172 |
| C | 2.27069051  | 0.35520078  | 0.54484463  |
| C | 3.47287285  | 0.98343659  | 1.04146007  |
| H | 1.17310840  | -1.26817475 | -0.23820763 |
| H | -0.15210810 | 1.50619921  | 0.19225923  |
| C | -1.58895215 | -0.83071509 | 1.91000285  |
| C | -2.85380443 | -1.65882890 | -1.22773796 |
| H | -0.53270289 | 0.21819512  | -2.44618021 |
| H | 4.37013278  | 0.33861183  | 0.95069593  |
| H | 3.38571371  | 1.24170453  | 2.10738453  |
| H | 3.71134219  | 1.91048261  | 0.49467638  |
| H | -3.65359409 | -1.08967538 | -1.71772461 |
| H | -3.29811191 | -2.21036016 | -0.39212203 |
| H | -2.48069161 | -2.38770416 | -1.95729660 |
| H | -0.69192688 | -1.18184395 | 2.43988276  |
| H | -2.33367558 | -1.63522982 | 1.93510848  |
| H | -1.98831413 | 0.00796946  | 2.50479125  |

ts5bhme\_12

E [Hartrees] = -350.0019977022

Gcorr [kcal/mol] = 89.890

|   |             |             |             |
|---|-------------|-------------|-------------|
| C | -2.51395557 | -0.34330472 | -0.33502180 |
| C | 0.51383670  | -1.45068032 | -0.77307329 |
| C | 1.65157434  | -0.65276023 | -0.92381552 |



|   |             |             |             |
|---|-------------|-------------|-------------|
| C | 1.23176576  | 0.30133552  | 0.00746094  |
| C | -0.06918206 | -0.48955912 | 0.28264353  |
| C | -1.35085697 | 0.23069042  | -0.12175264 |
| H | -1.27589412 | 1.32268328  | -0.23376519 |
| C | -0.17666082 | -1.06678069 | 1.70171801  |
| C | 1.75580657  | 1.56772530  | 0.57566383  |
| H | 2.54636033  | -0.73763646 | -1.53643103 |
| H | 0.13751940  | -2.36220539 | -1.22135974 |
| C | -3.89171808 | 0.00710478  | -0.71741795 |
| H | -1.01023377 | -1.77597957 | 1.75974765  |
| H | -0.36633675 | -0.27072058 | 2.43271988  |
| H | 0.74832327  | -1.58415603 | 1.98097188  |
| H | 1.87735391  | 1.50250279  | 1.66782217  |
| H | 1.07012719  | 2.40974906  | 0.39241158  |
| H | 2.72830830  | 1.82840157  | 0.14342590  |
| H | -4.19275709 | -0.49047852 | -1.64862289 |
| H | -3.99286448 | 1.09515174  | -0.87412131 |
| H | -4.61401937 | -0.28471757 | 0.05618775  |

ts5bhmememe\_12

E [Hartrees] = -350.0036494086

Gcorr [kcal/mol] = 89.441

|   |             |             |             |
|---|-------------|-------------|-------------|
| C | -2.47271785 | -0.36363766 | -0.40695834 |
| C | 0.48335418  | -1.44944563 | -0.77427881 |
| C | 1.61242160  | -0.64917209 | -0.97320583 |
| C | 1.23263475  | 0.30359908  | -0.02384159 |
| C | -0.04976326 | -0.48617876 | 0.31011205  |
| C | -1.35352377 | 0.21899403  | -0.03692383 |
| H | -1.33632207 | 1.31544107  | 0.05527430  |
| C | -0.10363930 | -1.07911610 | 1.72655900  |
| H | 1.66354852  | 1.21696700  | 0.37008319  |
| H | 2.47364967  | -0.74452603 | -1.63057979 |
| C | -0.09550355 | -2.68702577 | -1.34428777 |
| C | -3.85450666 | -0.01010961 | -0.77452099 |
| H | -4.09823798 | -0.33452738 | -1.79443503 |
| H | -4.00933505 | 1.08179514  | -0.72644344 |
| H | -4.58469013 | -0.47737215 | -0.10074426 |
| H | -0.16489864 | -3.48958564 | -0.59384930 |
| H | 0.49653193  | -3.06221456 | -2.18650710 |
| H | -1.12350480 | -2.50161557 | -1.69262676 |
| H | -0.29358379 | -0.29714007 | 2.47192961  |
| H | 0.84238574  | -1.57338230 | 1.97571528  |
| H | -0.91657458 | -1.81129479 | 1.79865613  |

## ts6crbhhh\_124

E [Hartrees] = -349.9706987375

|   |             |             |             |
|---|-------------|-------------|-------------|
| C | 0.99052699  | -0.42217023 | -0.42045665 |
| C | -0.12850197 | 0.64974473  | 0.33155387  |
| C | -1.33024155 | -0.25253302 | 0.63183861  |
| C | -1.49310793 | -0.56543530 | -0.67119672 |
| C | -0.22439366 | 0.18514614  | -1.09971568 |
| C | 1.84885655  | 0.48702651  | 0.18211956  |
| C | 2.74204987  | -0.09372964 | 1.24203322  |
| H | 0.95800840  | -1.50554208 | -0.20101220 |
| H | -0.04962468 | 1.68243070  | 0.64294702  |
| C | -1.98182665 | -0.62930921 | 1.91582063  |
| C | -2.42734805 | -1.43235104 | -1.44064712 |
| H | -0.11722891 | 0.84495989  | -1.95632455 |
| H | -1.88443111 | -2.24952132 | -1.93645757 |
| H | -2.94038549 | -0.86875635 | -2.23110179 |
| H | -3.19031765 | -1.87296622 | -0.78959044 |
| H | 3.76662632  | -0.07999171 | 0.84142436  |
| H | 2.52376185  | -1.13203361 | 1.56275642  |
| H | 2.77152047  | 0.54598625  | 2.13296969  |
| H | -2.36752888 | 0.25154144  | 2.44604301  |
| H | -1.26631328 | -1.11912843 | 2.59019307  |
| H | -2.81875836 | -1.31606044 | 1.74803647  |

## ts6crbhhme\_123

E [Hartrees] = -349.9661692650

|   |             |             |             |
|---|-------------|-------------|-------------|
| C | 0.72115280  | -0.48062873 | -0.89627137 |
| C | -0.09689416 | 0.60227843  | 0.20478457  |
| C | -1.32078443 | -0.25008174 | 0.60095078  |
| C | -1.75036409 | -0.31017990 | -0.67226854 |
| C | -0.49687754 | 0.36983964  | -1.22723359 |
| C | 1.82481361  | 0.19721701  | -0.40241807 |
| C | 2.79917938  | -0.65291561 | 0.36084097  |
| H | 0.55889429  | -1.57173229 | -0.82009483 |
| C | 0.18298880  | 1.90707659  | 0.90778675  |
| C | -1.75910130 | -0.75929526 | 1.92752230  |
| H | -2.60092396 | -0.78255879 | -1.15503719 |
| H | -0.45677237 | 1.13171934  | -2.00123964 |
| H | 3.03106965  | -0.19752011 | 1.33305393  |
| H | 3.75012762  | -0.64373808 | -0.19190981 |
| H | 2.51624412  | -1.71146799 | 0.52914857  |
| H | 0.68405078  | 1.74006732  | 1.86807582  |
| H | -0.78283971 | 2.39645472  | 1.11391444  |
| H | 0.81026522  | 2.55730583  | 0.30063945  |

|   |             |             |            |
|---|-------------|-------------|------------|
| H | -1.87844482 | 0.06095782  | 2.64788159 |
| H | -1.01139516 | -1.44517538 | 2.34839064 |
| H | -2.71251458 | -1.29270027 | 1.85380169 |

ts6crbhmeH\_124

E [Hartrees] = -349.9683803982

Gcorr [kcal/mol] = 90.613

|   |             |             |             |
|---|-------------|-------------|-------------|
| C | 0.99183917  | -0.42953835 | -0.41307036 |
| C | -0.13234346 | 0.65459203  | 0.33351043  |
| C | -1.32835898 | -0.24654866 | 0.62398478  |
| C | -1.48368820 | -0.57501469 | -0.67256304 |
| C | -0.21823565 | 0.19562358  | -1.10283257 |
| C | 1.85016050  | 0.47969953  | 0.18327185  |
| C | 2.74474369  | -0.08265539 | 1.25052784  |
| H | 0.95741684  | -1.51182706 | -0.19164889 |
| H | -0.05047081 | 1.68573125  | 0.65043413  |
| H | -1.82114003 | -0.53165593 | 1.54756598  |
| C | -2.41120759 | -1.43342258 | -1.45732367 |
| C | -0.09949811 | 1.08329064  | -2.31403185 |
| H | -1.86773605 | -2.26658961 | -1.92532921 |
| H | -2.88165999 | -0.86819075 | -2.27273450 |
| H | -3.20360288 | -1.84955957 | -0.82663768 |
| H | 3.77000746  | -0.07101738 | 0.85176863  |
| H | 2.52769323  | -1.11651785 | 1.58426935  |
| H | 2.77042059  | 0.56887431  | 2.13291129  |
| H | -0.07677991 | 0.49171357  | -3.23784634 |
| H | 0.82464976  | 1.66432189  | -2.24811854 |
| H | -0.94751262 | 1.77575350  | -2.37636894 |

ts6crbhmemE\_124

E [Hartrees] = -349.9628474975

Gcorr [kcal/mol] = 91.254

|   |             |             |             |
|---|-------------|-------------|-------------|
| C | 0.99865990  | -0.42334504 | -0.40944802 |
| C | -0.13857902 | 0.70243762  | 0.31768786  |
| C | -1.31112034 | -0.24123877 | 0.61674795  |
| C | -1.46073886 | -0.56513668 | -0.67716188 |
| C | -0.20571373 | 0.20868104  | -1.10964084 |
| C | 1.90026500  | 0.46890614  | 0.14307149  |
| C | 2.78736121  | -0.09239482 | 1.21545661  |
| H | 0.94075405  | -1.50096146 | -0.17201391 |
| C | -0.13760401 | 2.12313756  | 0.82517407  |
| H | -1.79886272 | -0.52106674 | 1.54467570  |
| H | -2.13944773 | -1.21581217 | -1.22120199 |
| C | -0.06962840 | 1.06649494  | -2.34032885 |

|   |             |             |             |
|---|-------------|-------------|-------------|
| H | 3.82626246  | -0.02275852 | 0.86118937  |
| H | 2.60116376  | -1.14201814 | 1.51783947  |
| H | 2.75076262  | 0.53803417  | 2.11428282  |
| H | -0.04474157 | 0.45104994  | -3.24793685 |
| H | 0.86083895  | 1.63852101  | -2.28315183 |
| H | -0.90992112 | 1.76514346  | -2.42757786 |
| H | 0.20596324  | 2.17180888  | 1.86436710  |
| H | -1.17295155 | 2.49792427  | 0.79735866  |
| H | 0.50727272  | 2.75943450  | 0.22091711  |

ts7hh\_124

E [Hartrees] = -350.0439052669

Gcorr [kcal/mol] = 91.176

|   |             |             |             |
|---|-------------|-------------|-------------|
| C | -1.27528490 | 1.24025287  | -0.27515702 |
| C | -1.20821214 | -0.12511974 | -0.38671153 |
| C | 0.00298141  | -0.36876262 | 0.38222445  |
| C | -0.00217457 | 1.76438226  | 0.23929253  |
| C | 1.28715968  | -0.11871380 | -0.27355731 |
| C | 1.31919382  | 1.24745134  | -0.15891680 |
| H | -1.71818386 | -0.77414857 | -1.09138760 |
| H | -0.05044611 | -0.10621299 | 1.44120510  |
| C | 2.09621267  | -1.05596962 | -1.11244630 |
| C | -2.40946714 | 2.15253855  | -0.66330805 |
| H | -0.02511443 | 2.73331081  | 0.75083212  |
| C | 2.45246881  | 2.18557545  | -0.48584342 |
| H | 1.45379978  | -1.59512394 | -1.82361101 |
| H | 2.60302055  | -1.81766257 | -0.50541505 |
| H | 2.85834451  | -0.52171678 | -1.68903741 |
| H | 2.69486130  | 2.81943652  | 0.37800369  |
| H | 2.19615000  | 2.85802923  | -1.31522911 |
| H | 3.36142418  | 1.63857617  | -0.75725166 |
| H | -2.07854747 | 2.93751980  | -1.35540219 |
| H | -2.82966307 | 2.65598893  | 0.21835176  |
| H | -3.22071630 | 1.59096625  | -1.13849974 |

ts7hhme\_123

E [Hartrees] = -350.0422181463

|   |             |             |             |
|---|-------------|-------------|-------------|
| C | -1.23261095 | 1.32495527  | -0.39831807 |
| C | -1.28292460 | -0.01790610 | -0.15249027 |
| C | 0.01922211  | -0.49458399 | 0.37107993  |
| C | 0.02030188  | 1.64986879  | 0.27083353  |
| C | 1.30222956  | -0.02141679 | -0.20088066 |
| C | 1.24649958  | 1.32155806  | -0.44472910 |
| C | -2.43487302 | -0.95764700 | -0.39809798 |

|   |             |             |             |
|---|-------------|-------------|-------------|
| C | 0.03370373  | -1.72928314 | 1.24491300  |
| C | 2.44164725  | -0.96435107 | -0.48906501 |
| H | -1.78736377 | 1.90371290  | -1.13076193 |
| H | 0.04042703  | 1.51882266  | 1.35455453  |
| H | 1.77543143  | 1.89908023  | -1.19698068 |
| H | -2.87277672 | -1.31420201 | 0.54454491  |
| H | -2.12469012 | -1.84624116 | -0.96336168 |
| H | -3.23026578 | -0.45265844 | -0.95604142 |
| H | 0.93322466  | -1.78363000 | 1.86672427  |
| H | 0.01831662  | -2.63913350 | 0.62388631  |
| H | -0.83990133 | -1.77862704 | 1.90310000  |
| H | 2.10832116  | -1.85172405 | -1.04299502 |
| H | 2.91279336  | -1.32269471 | 0.43670225  |
| H | 3.21755142  | -0.46147069 | -1.07569526 |

ts7hhme\_124

E [Hartrees] = -350.0376370151

|   |             |             |             |
|---|-------------|-------------|-------------|
| C | -1.34617572 | 1.10093996  | 0.07146675  |
| C | -1.30717534 | -0.24435368 | -0.18197784 |
| C | 0.02664744  | -0.52496839 | 0.37598645  |
| C | -0.03627060 | 1.67144717  | 0.38594095  |
| C | 1.15454650  | -0.16277624 | -0.47168288 |
| C | 1.19755062  | 1.19500787  | -0.22522512 |
| C | -2.14475702 | -1.08273656 | -1.09676247 |
| C | 0.20699724  | -0.77955690 | 1.84469229  |
| H | 1.54167956  | -0.68019940 | -1.34606054 |
| H | -2.22096317 | 1.74150527  | -0.06404214 |
| H | -0.00819785 | 2.62099298  | 0.92693273  |
| C | 2.30907914  | 2.14090178  | -0.60272212 |
| H | -2.53276235 | -1.97957315 | -0.59559100 |
| H | -1.56331678 | -1.42916443 | -1.96337497 |
| H | -2.99583495 | -0.50907142 | -1.47823196 |
| H | 1.15642862  | -0.38298504 | 2.21769288  |
| H | 0.24340349  | -1.87542768 | 1.97654537  |
| H | -0.63962780 | -0.41621566 | 2.43588065  |
| H | 3.01904548  | 1.65635735  | -1.28192016 |
| H | 2.87483313  | 2.46137420  | 0.28321547  |
| H | 1.92336237  | 3.04653899  | -1.08750145 |

ts7meme\_124

E [Hartrees] = -350.0395749898

Gcorr [kcal/mol] = 91.712

|   |             |             |             |
|---|-------------|-------------|-------------|
| C | -1.24850292 | 1.08562328  | 0.00281776  |
| C | -1.19435397 | -0.25767877 | -0.22940025 |

|   |             |             |             |
|---|-------------|-------------|-------------|
| C | 0.12892705  | -0.51337324 | 0.37153216  |
| C | 0.04955437  | 1.67884111  | 0.37009948  |
| C | 1.26504581  | -0.15321970 | -0.46860123 |
| C | 1.28720655  | 1.20036754  | -0.22842248 |
| C | -2.02182352 | -1.13333203 | -1.11722740 |
| C | 0.28258530  | -0.71631144 | 1.85278097  |
| H | 1.66791030  | -0.68667570 | -1.32638589 |
| H | -2.12175234 | 1.72853159  | -0.14202733 |
| C | 0.06129654  | 2.91820337  | 1.21791803  |
| H | 2.08069592  | 1.90273381  | -0.49906319 |
| H | -2.41912208 | -2.00516807 | -0.58057340 |
| H | -1.42761298 | -1.52107201 | -1.95703953 |
| H | -2.86542815 | -0.57611844 | -1.53775152 |
| H | 1.21888029  | -0.29049590 | 2.22884420  |
| H | 0.32792237  | -1.80335299 | 2.03800441  |
| H | -0.57763821 | -0.33438106 | 2.41375858  |
| H | 0.12642277  | 2.66415721  | 2.28777683  |
| H | -0.85820020 | 3.50529317  | 1.09006758  |
| H | 0.92723334  | 3.55363525  | 0.99064074  |

ts8hh\_124

E [Hartrees] = -350.0482528036

Gcorr [kcal/mol] = 92.606

|   |             |             |             |
|---|-------------|-------------|-------------|
| C | -1.32548508 | 1.49927336  | -0.40757487 |
| C | -1.09779576 | 0.24183337  | -1.07422975 |
| C | -0.30547399 | -0.72402225 | -0.38410419 |
| C | -0.06757865 | 2.09520559  | -0.51750517 |
| C | 0.99654443  | -0.21295797 | -0.47601909 |
| C | 1.06939429  | 1.22034325  | -0.72656023 |
| H | -0.63547938 | 0.43961054  | -2.04663601 |
| H | -0.60783543 | -1.45928091 | 0.35930284  |
| C | 2.22023849  | -1.00695034 | -0.07545713 |
| C | -2.42743305 | 1.90688620  | 0.51932278  |
| H | 0.12813619  | 3.12508012  | -0.20751366 |
| C | 2.41152864  | 1.86556120  | -0.96910665 |
| H | 2.88955564  | -1.17878250 | -0.92902201 |
| H | 1.91959318  | -1.99015376 | 0.30093403  |
| H | 2.81421995  | -0.51310352 | 0.70458413  |
| H | 2.38008743  | 2.94272857  | -0.77398016 |
| H | 2.71798873  | 1.73580305  | -2.01679951 |
| H | 3.20563392  | 1.42589241  | -0.35585445 |
| H | -2.19126006 | 2.84539062  | 1.03112941  |
| H | -2.59849230 | 1.13596898  | 1.28462233  |
| H | -3.37742957 | 2.03518693  | -0.01501623 |

ts8hme\_123

E [Hartrees] = -350.0481580592

Gcorr [kcal/mol] = 93.106

|   |             |             |             |
|---|-------------|-------------|-------------|
| C | -1.08981526 | 1.06882401  | -0.84992475 |
| C | -1.33238094 | -0.19890223 | -0.09669377 |
| C | -0.11097888 | -0.81241144 | -0.01098355 |
| C | -0.21387243 | 1.94905832  | -0.19144840 |
| C | 1.12436903  | -0.00755837 | -0.32582923 |
| C | 1.10927186  | 1.38204388  | -0.33839417 |
| C | -2.66668329 | -0.67113945 | 0.39174757  |
| C | 0.08463576  | -2.22616798 | 0.49010695  |
| C | 2.44159733  | -0.73755931 | -0.41616466 |
| H | -0.73132489 | 0.83870664  | -1.86209162 |
| H | -0.47117210 | 2.48744441  | 0.72493933  |
| H | 2.04329864  | 1.93255512  | -0.21319962 |
| H | -3.15598931 | 0.12226634  | 0.97211759  |
| H | -2.60181993 | -1.56087462 | 1.02450643  |
| H | -3.33737302 | -0.89738537 | -0.44898852 |
| H | 0.67769560  | -2.25729277 | 1.41424921  |
| H | 0.61543520  | -2.84117321 | -0.24770692 |
| H | -0.86960979 | -2.71775329 | 0.69253913  |
| H | 2.43723191  | -1.45210136 | -1.25071052 |
| H | 2.65653964  | -1.31833162 | 0.48929824  |
| H | 3.26940404  | -0.04115760 | -0.57897419 |

ts8hme\_124

E [Hartrees] = -350.0475888375

Gcorr [kcal/mol] = 95.339

|   |             |             |             |
|---|-------------|-------------|-------------|
| C | -1.05258468 | 1.17189815  | -0.68525079 |
| C | -1.35053325 | -0.02203875 | 0.03500128  |
| C | -0.16594649 | -0.76965214 | -0.10405732 |
| C | -0.14450236 | 2.11782724  | -0.09513983 |
| C | 0.99705901  | 0.02471672  | -0.41522762 |
| C | 1.09225624  | 1.45880180  | -0.24164970 |
| H | -2.06966439 | -0.18674617 | 0.83449765  |
| C | -0.02932059 | -2.21859924 | 0.29960438  |
| H | 1.93718232  | -0.51329531 | -0.55554493 |
| H | -0.67798172 | 0.89343566  | -1.67524811 |
| C | -0.46980850 | 3.26744308  | 0.80828503  |
| C | 2.43559943  | 2.09327089  | 0.03956539  |
| H | 0.96145458  | -2.44114560 | 0.71269466  |
| H | -0.19170974 | -2.89029178 | -0.55422283 |
| H | -0.77994596 | -2.47908037 | 1.05560820  |

|   |             |            |             |
|---|-------------|------------|-------------|
| H | 0.34962990  | 3.50942695 | 1.49256559  |
| H | -1.36251433 | 3.03770370 | 1.40576236  |
| H | -0.70278622 | 4.17642030 | 0.23639299  |
| H | 2.35673293  | 2.86966794 | 0.80968077  |
| H | 2.84515841  | 2.57879927 | -0.85655162 |
| H | 3.17027265  | 1.35702161 | 0.38454627  |

ts8meme\_124

E [Hartrees] = -350.0512902276

Gcorr [kcal/mol] = 92.326

|   |             |             |             |
|---|-------------|-------------|-------------|
| C | -1.04757420 | 1.16825123  | -0.17347682 |
| C | -1.02041564 | -0.19065551 | -0.28265196 |
| C | 0.28996955  | -0.71464703 | 0.21044019  |
| C | 0.11878545  | 1.98121555  | 0.28802084  |
| C | 1.32735731  | 0.07282353  | -0.33899629 |
| C | 1.35954587  | 1.42599633  | 0.29842501  |
| C | -2.21545924 | -1.04900825 | -0.57706014 |
| C | 0.35750526  | -1.25377646 | 1.61818606  |
| H | 1.28958141  | 0.15780690  | -1.43540163 |
| H | -1.98258170 | 1.70336585  | -0.34575127 |
| C | -0.15358840 | 3.40543849  | 0.69838905  |
| H | 2.24739950  | 1.99106406  | 0.57711757  |
| H | -2.41106470 | -1.73259655 | 0.26122303  |
| H | -2.04115797 | -1.67928183 | -1.45864183 |
| H | -3.11761569 | -0.45279258 | -0.75250900 |
| H | 1.27131988  | -0.91277149 | 2.11891455  |
| H | 0.39034133  | -2.35345567 | 1.60887088  |
| H | -0.51062760 | -0.96235673 | 2.22334876  |
| H | -0.88672375 | 3.44897326  | 1.51550849  |
| H | -0.57495308 | 3.98446630  | -0.13469699 |
| H | 0.75929697  | 3.90787673  | 1.03308983  |

tstrim\_mestIn

E [Hartrees] = -349.8895580413

Gcorr [kcal/mol] = 86.467

|   |             |             |             |
|---|-------------|-------------|-------------|
| H | 0.52002003  | -0.64117114 | -2.50132371 |
| C | 0.63596825  | -0.78276466 | -1.44913806 |
| C | 1.13767747  | -1.39764968 | -0.50556119 |
| C | 0.47028260  | -0.58550644 | 1.59827895  |
| H | 1.09975022  | -1.36607823 | 1.96584580  |
| C | -0.29372082 | 0.35782413  | 1.81400692  |
| C | -1.10507442 | 1.36935945  | -0.14883455 |
| H | -1.61681511 | 2.00951703  | 0.53594461  |
| C | -0.84424897 | 1.03996720  | -1.30796010 |



|   |             |             |             |
|---|-------------|-------------|-------------|
| C | -0.96372978 | 1.17925073  | -2.77122365 |
| H | -1.36867278 | 0.27027505  | -3.23341300 |
| H | -1.63718339 | 2.00870810  | -3.01791308 |
| H | 0.00686970  | 1.38545918  | -3.23950520 |
| C | -1.03565052 | 1.26959560  | 2.70454344  |
| H | -0.74201608 | 2.31541540  | 2.54992226  |
| H | -0.83706837 | 1.01796309  | 3.75318636  |
| H | -2.11879285 | 1.20175149  | 2.54314316  |
| C | 1.99741886  | -2.45050567 | 0.06647268  |
| H | 1.42389414  | -3.14914900 | 0.68844417  |
| H | 2.47115581  | -3.02848265 | -0.73597434 |
| H | 2.79485277  | -2.02835058 | 0.69076704  |

<sup>1</sup> K. Yamaguchi, F. Jensen, A. Dorigo and K. N. Houk, *Chem. Phys. Lett.*, 1988, **149**, 537–542.
